# Supplementary material for: The use of Foundational Ontologies in Bioinformatics
Source: Research Square preprint supplement (doi:10.21203/rs.3.rs-1929507/v1), 2022-08-09
Supplement: Supplementary file 3 [file Extraction - 2 - Duplicates Removed.xlsx]

## Sheet: Duplicates Removed
ID	Title	Author	Publication Year	Publication Title	ISSN	DOI	Abstract Note
1	The BioTop Family of Upper Level Ontological Resources for Biomedicine.	Schulz, Stefan; Boeker, Martin; Martinez-Costa, Catalina	2017	Studies in health technology and informatics	1879-8365 0926-9630		BioTop is a domain upper level ontology for the life sciences, based on OWL DL, introduced ten years ago. This paper provides an update of the current state of this resource, with a special focus on BioTop's top level, BioTopLite, which currently contains 55 classes, 37 object properties and 247 description logics axioms. A bridging file allows harmonising BioTopLite with the classes of Basic For…
2	Interoperability between biomedical ontologies through relation expansion, upper-level ontologies and automatic reasoning.	Hoehndorf, Robert; Dumontier, Michel; Oellrich, Anika; Rebholz-Schuhmann, Dietrich; Schofield, Paul N.; Gkoutos, Georgios V.	2011	PloS one	1932-6203 1932-6203	10.1371/journal.pone.0022006	Researchers design ontologies as a means to accurately annotate and integrate experimental data across heterogeneous and disparate data- and knowledge bases. Formal ontologies make the semantics of terms and relations explicit such that automated reasoning can be used to verify the consistency of knowledge. However, many biomedical ontologies do not sufficiently formalize the semantics of their r…
3	Proposed actions are no actions: re-modeling an ontology design pattern with a realist top-level ontology.	Seddig-Raufie, Djamila; Jansen, Ludger; Schober, Daniel; Boeker, Martin; Grewe, Niels; Schulz, Stefan	2012	Journal of biomedical semantics	2041-1480	10.1186/2041-1480-3-S2-S2	BACKGROUND: Ontology Design Patterns (ODPs) are representational artifacts devised to offer solutions for recurring ontology design problems. They promise to enhance the ontology building process in terms of flexibility, re-usability and expansion, and to make the result of ontology engineering more predictable. In this paper, we analyze ODP repositories and investigate their relation with upper-…
4	Enhancing Terminological Knowledge With Upper Level Ontologies.	Seppala, Selja; Hicks, Amanda	2015	CEUR workshop proceedings	1613-0073 1613-0073		In this communication, we advocate the use of upper level ontologies such as the Basic Formal Ontology (BFO) to enhance terminological resources and research. First, we present common issues in ontologized terminological work. Then, we review two projects that illustrate the potential advantages of integrating rigorous formal upper level ontologies. Finally, we discuss possible challenges and con…
5	SNOMED CT standard ontology based on the ontology for general medical science.	El-Sappagh, Shaker; Franda, Francesco; Ali, Farman; Kwak, Kyung-Sup	2018	BMC medical informatics and decision making	1472-6947 1472-6947	10.1186/s12911-018-0651-5	BACKGROUND: Systematized Nomenclature of Medicine-Clinical Terms (SNOMED CT, hereafter abbreviated SCT) is a comprehensive medical terminology used for standardizing the storage, retrieval, and exchange of electronic health data. Some efforts have been made to capture the contents of SCT as Web Ontology Language (OWL), but these efforts have been hampered by the size and complexity of SCT. METHOD…
6	Harmonizing SNOMED CT with BioTopLite: An Exercise in Principled Ontology Alignment.	Schulz, Stefan; Martinez-Costa, Catalina	2015	Studies in health technology and informatics	1879-8365 0926-9630		The integration of heterogeneous ontologies is often hampered by different upper level categories and relations. We report on an on-going effort to align clinical terminology/ontology SNOMED CT with the formal upper-level ontology BioTopLite. This alignment introduces several constraints at the OWL-DL level. The mapping was done manually by analysing formal and textual definitions. Descriptive lo…
7	Towards automated biomedical ontology harmonization.	Uribe, Gustavo A.; Lopez, Diego M.; Blobel, Bernd	2014	Studies in health technology and informatics	1879-8365 0926-9630		The use of biomedical ontologies is increasing, especially in the context of health systems interoperability. Ontologies are key pieces to understand the semantics of information exchanged. However, given the diversity of biomedical ontologies, it is essential to develop tools that support harmonization processes amongst them. Several algorithms and tools are proposed by computer scientist for pa…
8	Top-level categories of constitutively organized material entities--suggestions for a formal top-level ontology.	Vogt, Lars; Grobe, Peter; Quast, Bjorn; Bartolomaeus, Thomas	2011	PloS one	1932-6203 1932-6203	10.1371/journal.pone.0018794	BACKGROUND: Application oriented ontologies are important for reliably communicating and managing data in databases. Unfortunately, they often differ in the definitions they use and thus do not live up to their potential. This problem can be reduced when using a standardized and ontologically consistent template for the top-level categories from a top-level formal foundational ontology. This woul…
9	Scalable representations of diseases in biomedical ontologies.	Schulz, Stefan; Spackman, Kent; James, Andrew; Cocos, Cristian; Boeker, Martin	2011	Journal of biomedical semantics	2041-1480	10.1186/2041-1480-2-S2-S6	BACKGROUND: The realm of pathological entities can be subdivided into pathological dispositions, pathological processes, and pathological structures. The latter are the bearer of dispositions, which can then be realized by their manifestations - pathologic processes. Despite its ontological soundness, implementing this model via purpose-oriented domain ontologies will likely require considerable …
10	The Problems of Realism-Based Ontology Design: a Case Study in Creating Definitions for an Application Ontology for Diabetes Camps.	Schuler, James C.; Ceusters, Werner M.	2017	AMIA ... Annual Symposium proceedings. AMIA Symposium	1942-597X 1559-4076		A requirement of realism-based ontology design is that classes denote exclusively entities that exist objectively in reality and that their definitions adhere to strict criteria to ensure that the classes are re-usable in other ontologies while preserving their ontological commitment. Building realism-based ontologies is therefore quite challenging and time-consuming, demanding considerable train…
11	Upper-level ontologies for health information systems. Towards an archetype patterns approach.	Raghupathi, W.; Umar, A.	2011	Methods of information in medicine	2511-705X 0026-1270	10.3414/ME0519	OBJECTIVES: We examine the potential of archetype patterns for upper-level ontology development in health information systems (HISs). METHODS: Archetype patterns, based on the integration of archetype concepts and design patterns, are conceptualized and developed for ontology in the HIS domain. The UML provides the underlying modeling support. RESULTS: We argue in favor of the archetype pattern p…
12	OBIB-a novel ontology for biobanking.	Brochhausen, Mathias; Zheng, Jie; Birtwell, David; Williams, Heather; Masci, Anna Maria; Ellis, Helena Judge; Stoeckert, Christian J. Jr	2016	Journal of biomedical semantics	2041-1480	10.1186/s13326-016-0068-y	BACKGROUND: Biobanking necessitates extensive integration of data to allow data analysis and specimen sharing. Ontologies have been demonstrated to be a promising approach in fostering better semantic integration of biobank-related data. Hitherto no ontology provided the coverage needed to capture a broad spectrum of biobank user scenarios. METHODS: Based in the principles laid out by the Open Bi…
14	Toward cognitivist ontologies : on the role of selective attention for upper ontologies.	Carstensen, Kai-Uwe	2011	Cognitive processing	1612-4790 1612-4782	10.1007/s10339-011-0405-0	Ontologies play a key role in modern information society although there are still many fundamental questions regarding their structure to be answered. In this paper, some of these are presented, and it is argued that they require a shift from realist to cognitivist ontologies, with ontology design crucially depending on taking both cognitive and linguistic aspects into consideration. A detailed d…
16	Development and Evaluation of Ontologies in Traditional Medicine: A Review Study.	Shojaee-Mend, Hassan; Ayatollahi, Haleh; Abdolahadi, Azam	2019	Methods of information in medicine	2511-705X 0026-1270	10.1055/s-0040-1702236	BACKGROUND: Development of ontologies in traditional medicine can be a foundation for other applications of informatics in this field. Despite the importance of the development of ontologies in traditional medicine, there are few review studies in this area. This study aims to review different methods for ontology development and evaluation in traditional medicine. METHODS: This review study was …
17	Effects of guideline-based training on the quality of formal ontologies: a randomized controlled trial.	Boeker, Martin; Jansen, Ludger; Grewe, Niels; Rohl, Johannes; Schober, Daniel; Seddig-Raufie, Djamila; Schulz, Stefan	2013	PloS one	1932-6203 1932-6203	10.1371/journal.pone.0061425	BACKGROUND: The importance of ontologies in the biomedical domain is generally recognized. However, their quality is often too poor for large-scale use in critical applications, at least partially due to insufficient training of ontology developers. OBJECTIVE: To show the efficacy of guideline-based ontology development training on the performance of ontology developers. The hypothesis was that s…
18	Expert2OWL: A Methodology for Pattern-Based Ontology Development.	Tahar, Kais; Xu, Jie; Herre, Heinrich	2017	Studies in health technology and informatics	1879-8365 0926-9630		The formalization of expert knowledge enables a broad spectrum of applications employing ontologies as underlying technology. These include eLearning, Semantic Web and expert systems. However, the manual construction of such ontologies is time-consuming and thus expensive. Moreover, experts are often unfamiliar with the syntax and semantics of formal ontology languages such as OWL and usually hav…
19	MiDas: automatic extraction of a common domain of discourse in sleep medicine for multi-center data integration.	Sahoo, Satya S.; Ogbuji, Chimezie; Luo, Lingyun; Dong, Xiao; Cui, Licong; Redline, Susan S.; Zhang, Guo-Qiang	2011	AMIA ... Annual Symposium proceedings. AMIA Symposium	1942-597X 1559-4076		Clinical studies often use data dictionaries with controlled sets of terms to facilitate data collection, limited interoperability and sharing at a local site. Multi-center retrospective clinical studies require that these data dictionaries, originating from individual participating centers, be harmonized in preparation for the integration of the corresponding clinical research data. Domain ontol…
20	CNTRO 2.0: A Harmonized Semantic Web Ontology for Temporal Relation Inferencing in Clinical Narratives.	Tao, Cui; Solbrig, Harold R.; Chute, Christopher G.	2011	AMIA Joint Summits on Translational Science proceedings. AMIA Joint Summits on Translational Science	2153-4063		The Clinical Narrative Temporal Relation Ontology (CNTRO) has been developed for the purpose of allowing temporal information of clinical data to be semantically annotated and queried, and using inference to expose new temporal features and relations based on the semantic assertions and definitions of the temporal aspects in the ontology. While CNTRO provides a formal semantic foundation to lever…
21	Physical properties of biological entities: an introduction to the ontology of physics for biology.	Cook, Daniel L.; Bookstein, Fred L.; Gennari, John H.	2011	PloS one	1932-6203 1932-6203	10.1371/journal.pone.0028708	As biomedical investigators strive to integrate data and analyses across spatiotemporal scales and biomedical domains, they have recognized the benefits of formalizing languages and terminologies via computational ontologies. Although ontologies for biological entities-molecules, cells, organs-are well-established, there are no principled ontologies of physical properties-energies, volumes, flow …
22	Transforming semi-structured life science diagrams into meaningful domain ontologies with DiDOn.	Keet, C. Maria	2012	Journal of biomedical informatics	1532-0480 1532-0464	10.1016/j.jbi.2012.01.004	Bio-ontology development is a resource-consuming task despite the many open source ontologies available for reuse. Various strategies and tools for bottom-up ontology development have been proposed from a computing angle, yet the most obvious one from a domain expert perspective is unexplored: the abundant diagrams in the sciences. To speed up and simplify bio-ontology development, we propose a d…
23	A unified anatomy ontology of the vertebrate skeletal system.	Dahdul, Wasila M.; Balhoff, James P.; Blackburn, David C.; Diehl, Alexander D.; Haendel, Melissa A.; Hall, Brian K.; Lapp, Hilmar; Lundberg, John G.; Mungall, Christopher J.; Ringwald, Martin; Segerdell, Erik; Van Slyke, Ceri E.; Vickaryous, Matthew K.; Westerfield, Monte; Mabee, Paula M.	2012	PloS one	1932-6203 1932-6203	10.1371/journal.pone.0051070	The skeleton is of fundamental importance in research in comparative vertebrate morphology, paleontology, biomechanics, developmental biology, and systematics. Motivated by research questions that require computational access to and comparative reasoning across the diverse skeletal phenotypes of vertebrates, we developed a module of anatomical concepts for the skeletal system, the Vertebrate Skel…
24	The neurological disease ontology.	Jensen, Mark; Cox, Alexander P.; Chaudhry, Naveed; Ng, Marcus; Sule, Donat; Duncan, William; Ray, Patrick; Weinstock-Guttman, Bianca; Smith, Barry; Ruttenberg, Alan; Szigeti, Kinga; Diehl, Alexander D.	2013	Journal of biomedical semantics	2041-1480	10.1186/2041-1480-4-42	BACKGROUND: We are developing the Neurological Disease Ontology (ND) to provide a framework to enable representation of aspects of neurological diseases that are relevant to their treatment and study. ND is a representational tool that addresses the need for unambiguous annotation, storage, and retrieval of data associated with the treatment and study of neurological diseases. ND is being develop…
25	Light-Weighted Automatic Import of Standardized Ontologies into the Content Management System Drupal.	Beger, Christoph; Uciteli, Alexandr; Herre, Heinrich	2017	Studies in health technology and informatics	1879-8365 0926-9630		The amount of ontologies, which are utilizable for widespread domains, is growing steadily. BioPortal alone, embraces over 500 published ontologies with nearly 8 million classes. In contrast, the vast informative content of these ontologies is only directly intelligible by experts. To overcome this deficiency it could be possible to represent ontologies as web portals, which does not require know…
26	Disease Specific Ontology of Adverse Events: Ontology extension and adaptation for Chronic Kidney Disease.	Kang, Yin; Fink, Jeffrey C.; Doerfler, Rebecca; Zhou, Lina	2018	Computers in biology and medicine	1879-0534 0010-4825	10.1016/j.compbiomed.2018.08.024	BACKGROUND: Adverse Event (AE) ontology can be used to support interoperability and computer-assisted reasoning of AEs. Despite significant progress in developing biomedical ontologies, they are facing the obstacle of adoption partly because those ontologies are too general to meet the requirements of a specific domain. Understanding and representing of AEs for a specific domain such as Chronic K…
27	Semantic aspects of the International Classification of Functioning, Disability and Health: towards sharing knowledge and unifying information.	Andronache, Adrian Stefan; Simoncello, Andrea; Della Mea, Vincenzo; Daffara, Carlo; Francescutti, Carlo	2012	American journal of physical medicine & rehabilitation	1537-7385 0894-9115	10.1097/PHM.0b013e31823d53ea	During the last decade, under the World Health Organization's direction, the International Classification of Functioning, Disability and Health (ICF) has become a reference tool for monitoring and developing various policies addressing people with disability. This article presents three steps to increase the semantic interoperability of ICF: first, the representation of ICF using ontology tools; …
28	CSEO - the Cigarette Smoke Exposure Ontology.	Younesi, Erfan; Ansari, Sam; Guendel, Michaela; Ahmadi, Shiva; Coggins, Chris; Hoeng, Julia; Hofmann-Apitius, Martin; Peitsch, Manuel C.	2014	Journal of biomedical semantics	2041-1480	10.1186/2041-1480-5-31	BACKGROUND: In the past years, significant progress has been made to develop and use experimental settings for extensive data collection on tobacco smoke exposure and tobacco smoke exposure-associated diseases. Due to the growing number of such data, there is a need for domain-specific standard ontologies to facilitate the integration of tobacco exposure data. RESULTS: The CSEO (version 1.0) is c…
29	The ChEBI reference database and ontology for biologically relevant chemistry: enhancements for 2013.	Hastings, Janna; de Matos, Paula; Dekker, Adriano; Ennis, Marcus; Harsha, Bhavana; Kale, Namrata; Muthukrishnan, Venkatesh; Owen, Gareth; Turner, Steve; Williams, Mark; Steinbeck, Christoph	2013	Nucleic acids research	1362-4962 0305-1048	10.1093/nar/gks1146	ChEBI (http://www.ebi.ac.uk/chebi) is a database and ontology of chemical entities of biological interest. Over the past few years, ChEBI has continued to grow steadily in content, and has added several new features. In addition to incorporating all user-requested compounds, our annotation efforts have emphasized immunology, natural products and metabolites in many species. All database entries a…
30	TRAK ontology: defining standard care for the rehabilitation of knee conditions.	Button, Kate; van Deursen, Robert W.; Soldatova, Larisa; Spasic, Irena	2013	Journal of biomedical informatics	1532-0480 1532-0464	10.1016/j.jbi.2013.04.009	In this paper we discuss the design and development of TRAK (Taxonomy for RehAbilitation of Knee conditions), an ontology that formally models information relevant for the rehabilitation of knee conditions. TRAK provides the framework that can be used to collect coded data in sufficient detail to support epidemiologic studies so that the most effective treatment components can be identified, new …
31	Anatomy ontologies and potential users: bridging the gap.	Travillian, Ravensara S.; Adamusiak, Tomasz; Burdett, Tony; Gruenberger, Michael; Hancock, John; Mallon, Ann-Marie; Malone, James; Schofield, Paul; Parkinson, Helen	2011	Journal of biomedical semantics	2041-1480	10.1186/2041-1480-2-S4-S3	MOTIVATION: To evaluate how well current anatomical ontologies fit the way real-world users apply anatomy terms in their data annotations. METHODS: Annotations from three diverse multi-species public-domain datasets provided a set of use cases for matching anatomical terms in two major anatomical ontologies (the Foundational Model of Anatomy and Uberon), using two lexical-matching applications (Z…
32	Multi-species Ontologies of the Craniofacial Musculoskeletal System.	Mejino, Jose L. V. Jr; Detwiler, Landon T.; Cox, Timothy C.; Brinkley, James F.	2016	CEUR workshop proceedings	1613-0073 1613-0073		We created the Ontology of Craniofacial Development and Malformation (OCDM) [1] to provide a unifying framework for organizing and integrating craniofacial data ranging from genes to clinical phenotypes from multi-species. Within this framework we focused on spatio-structural representation of anatomical entities related to craniofacial development and malformation, such as craniosynostosis and m…
33	Development of an Intervention Setting Ontology for behaviour change: Specifying where interventions take place.	Norris, Emma; Marques, Marta M.; Finnerty, Ailbhe N.; Wright, Alison J.; West, Robert; Hastings, Janna; Williams, Poppy; Carey, Rachel N.; Kelly, Michael P.; Johnston, Marie; Michie, Susan	2020	Wellcome open research	2398-502X 2398-502X	10.12688/wellcomeopenres.15904.1	Background: Contextual factors such as an intervention's setting are key to understanding how interventions to change behaviour have their effects and patterns of generalisation across contexts. The intervention's setting is not consistently reported in published reports of evaluations. Using ontologies to specify and classify intervention setting characteristics enables clear and reproducible re…
34	Behavior change interventions: the potential of ontologies for advancing science and practice.	Larsen, Kai R.; Michie, Susan; Hekler, Eric B.; Gibson, Bryan; Spruijt-Metz, Donna; Ahern, David; Cole-Lewis, Heather; Ellis, Rebecca J. Bartlett; Hesse, Bradford; Moser, Richard P.; Yi, Jean	2017	Journal of behavioral medicine	1573-3521 0160-7715	10.1007/s10865-016-9768-0	A central goal of behavioral medicine is the creation of evidence-based interventions for promoting behavior change. Scientific knowledge about behavior change could be more effectively accumulated using "ontologies." In information science, an ontology is a systematic method for articulating a "controlled vocabulary" of agreed-upon terms and their inter-relationships. It involves three core elem…
35	Unintended consequences of existential quantifications in biomedical ontologies.	Boeker, Martin; Tudose, Ilinca; Hastings, Janna; Schober, Daniel; Schulz, Stefan	2011	BMC bioinformatics	1471-2105 1471-2105	10.1186/1471-2105-12-456	BACKGROUND: The Open Biomedical Ontologies (OBO) Foundry is a collection of freely available ontologically structured controlled vocabularies in the biomedical domain. Most of them are disseminated via both the OBO Flatfile Format and the semantic web format Web Ontology Language (OWL), which draws upon formal logic. Based on the interpretations underlying OWL description logics (OWL-DL) semantic…
36	Ontology for assessment studies of human-computer-interaction in surgery.	Machno, Andrej; Jannin, Pierre; Dameron, Olivier; Korb, Werner; Scheuermann, Gerik; Meixensberger, Jurgen	2015	Artificial intelligence in medicine	1873-2860 0933-3657	10.1016/j.artmed.2014.12.011	OBJECTIVE: New technologies improve modern medicine, but may result in unwanted consequences. Some occur due to inadequate human-computer-interactions (HCI). To assess these consequences, an investigation model was developed to facilitate the planning, implementation and documentation of studies for HCI in surgery. METHODS AND MATERIAL: The investigation model was formalized in Unified Modeling L…
37	Grains, components and mixtures in biomedical ontologies.	Jansen, Ludger; Schulz, Stefan	2011	Journal of biomedical semantics	2041-1480	10.1186/2041-1480-2-S4-S2	BACKGROUND: In biomedical ontologies, mereological relations have always been subject to special interest due to their high relevance in structural descriptions of anatomical entities, cells, and biomolecules. This paper investigates two important subrelations of has_proper_part, viz. the relation has_grain, which relates a collective entity to its multiply occurring uniform parts (e.g., water mo…
38	An ontology-based exploration of the concepts and relationships in the activities and participation component of the international classification of functioning, disability and health.	Della Mea, Vincenzo; Simoncello, Andrea	2012	Journal of biomedical semantics	2041-1480	10.1186/2041-1480-3-1	BACKGROUND: The International Classification of Functioning, Disability and Health (ICF) is a classification of health and health-related issues, aimed at describing and measuring health and disability at both individual and population levels. Here we discuss a preliminary qualitative and quantitative analysis of the relationships used in the Activities and Participation component of ICF, and a p…
39	The epidemiology ontology: an ontology for the semantic annotation of epidemiological resources.	Pesquita, Catia; Ferreira, Joao D.; Couto, Francisco M.; Silva, Mario J.	2014	Journal of biomedical semantics	2041-1480	10.1186/2041-1480-5-4	BACKGROUND: Epidemiology is a data-intensive and multi-disciplinary subject, where data integration, curation and sharing are becoming increasingly relevant, given its global context and time constraints. The semantic annotation of epidemiology resources is a cornerstone to effectively support such activities. Although several ontologies cover some of the subdomains of epidemiology, we identified…
40	Why functions are not special dispositions: an improved classification of realizables for top-level ontologies.	Rohl, Johannes; Jansen, Ludger	2014	Journal of biomedical semantics	2041-1480	10.1186/2041-1480-5-27	BACKGROUND: The concept of function is central to both biology and technology, but neither in philosophy nor in formal ontology is there a generally accepted theory of functions. In particular, there is no consensus how to include functions into a top-level ontology or whether to include them at all. METHODS: We first review current conceptions of functions in philosophy and formal ontology and e…
42	Towards symbiosis in knowledge representation and natural language processing for structuring clinical practice guidelines.	Weng, Chunhua; Payne, Philip R. O.; Velez, Mark; Johnson, Stephen B.; Bakken, Suzanne	2014	Studies in health technology and informatics	1879-8365 0926-9630		The successful adoption by clinicians of evidence-based clinical practice guidelines (CPGs) contained in clinical information systems requires efficient translation of free-text guidelines into computable formats. Natural language processing (NLP) has the potential to improve the efficiency of such translation. However, it is laborious to develop NLP to structure free-text CPGs using existing for…
43	OntoStudyEdit: a new approach for ontology-based representation and management of metadata in clinical and epidemiological research.	Uciteli, Alexandr; Herre, Heinrich	2015	Journal of biomedical semantics	2041-1480	10.1186/s13326-015-0042-0	BACKGROUND: The specification of metadata in clinical and epidemiological study projects absorbs significant expense. The validity and quality of the collected data depend heavily on the precise and semantical correct representation of their metadata. In various research organizations, which are planning and coordinating studies, the required metadata are specified differently, depending on many …
44	DermO; an ontology for the description of dermatologic disease.	Fisher, Hannah M.; Hoehndorf, Robert; Bazelato, Bruno S.; Dadras, Soheil S.; King, Lloyd E. Jr; Gkoutos, Georgios V.; Sundberg, John P.; Schofield, Paul N.	2016	Journal of biomedical semantics	2041-1480	10.1186/s13326-016-0085-x	BACKGROUND: There have been repeated initiatives to produce standard nosologies and terminologies for cutaneous disease, some dedicated to the domain and some part of bigger terminologies such as ICD-10. Recently, formally structured terminologies, ontologies, have been widely developed in many areas of biomedical research. Primarily, these address the aim of providing comprehensive working termi…
45	Toward a patient safety upper level ontology.	Souvignet, Julien; Rodrigues, Jean-Marie	2015	Studies in health technology and informatics	1879-8365 0926-9630		Patient Safety (PS) standardization is the key to improve interoperability and expand international share of incident reporting system knowledge. By aligning the Patient Safety Categorial Structure (PS-CAST) to the Basic Formal Ontology version 2 (BFO2) upper level ontology, we aim to provide more rigor on the underlying organization on the one hand, and to share instances of concepts of categori…
46	Representing vision and blindness.	Ray, Patrick L.; Cox, Alexander P.; Jensen, Mark; Allen, Travis; Duncan, William; Diehl, Alexander D.	2016	Journal of biomedical semantics	2041-1480	10.1186/s13326-016-0058-0	BACKGROUND: There have been relatively few attempts to represent vision or blindness ontologically. This is unsurprising as the related phenomena of sight and blindness are difficult to represent ontologically for a variety of reasons. Blindness has escaped ontological capture at least in part because: blindness or the employment of the term 'blindness' seems to vary from context to context, blin…
47	CELDA -- an ontology for the comprehensive representation of cells in complex systems.	Seltmann, Stefanie; Stachelscheid, Harald; Damaschun, Alexander; Jansen, Ludger; Lekschas, Fritz; Fontaine, Jean-Fred; Nguyen-Dobinsky, Throng Nghia; Leser, Ulf; Kurtz, Andreas	2013	BMC bioinformatics	1471-2105 1471-2105	10.1186/1471-2105-14-228	BACKGROUND: The need for detailed description and modeling of cells drives the continuous generation of large and diverse datasets. Unfortunately, there exists no systematic and comprehensive way to organize these datasets and their information. CELDA (Cell: Expression, Localization, Development, Anatomy) is a novel ontology for the association of primary experimental data and derived knowledge t…
49	CLO: The cell line ontology.	Sarntivijai, Sirarat; Lin, Yu; Xiang, Zuoshuang; Meehan, Terrence F.; Diehl, Alexander D.; Vempati, Uma D.; Schurer, Stephan C.; Pang, Chao; Malone, James; Parkinson, Helen; Liu, Yue; Takatsuki, Terue; Saijo, Kaoru; Masuya, Hiroshi; Nakamura, Yukio; Brush, Matthew H.; Haendel, Melissa A.; Zheng, Jie; Stoeckert, Christian J.; Peters, Bjoern; Mungall, Christopher J.; Carey, Thomas E.; States, David…	2014	Journal of biomedical semantics	2041-1480	10.1186/2041-1480-5-37	BACKGROUND: Cell lines have been widely used in biomedical research. The community-based Cell Line Ontology (CLO) is a member of the OBO Foundry library that covers the domain of cell lines. Since its publication two years ago, significant updates have been made, including new groups joining the CLO consortium, new cell line cells, upper level alignment with the Cell Ontology (CL) and the Ontolog…
50	Process attributes in bio-ontologies.	Andrade, Andre Q.; Blonde, Ward; Hastings, Janna; Schulz, Stefan	2012	BMC bioinformatics	1471-2105 1471-2105	10.1186/1471-2105-13-217	BACKGROUND: Biomedical processes can provide essential information about the (mal-) functioning of an organism and are thus frequently represented in biomedical terminologies and ontologies, including the GO Biological Process branch. These processes often need to be described and categorised in terms of their attributes, such as rates or regularities. The adequate representation of such process …
51	A unified framework for managing provenance information in translational research.	Sahoo, Satya S.; Nguyen, Vinh; Bodenreider, Olivier; Parikh, Priti; Minning, Todd; Sheth, Amit P.	2011	BMC bioinformatics	1471-2105 1471-2105	10.1186/1471-2105-12-461	BACKGROUND: A critical aspect of the NIH Translational Research roadmap, which seeks to accelerate the delivery of "bench-side" discoveries to patient's "bedside," is the management of the provenance metadata that keeps track of the origin and history of data resources as they traverse the path from the bench to the bedside and back. A comprehensive provenance framework is essential for researche…
53	An ontological analysis of medical Bayesian indicators of performance.	Barton, Adrien; Ethier, Jean-Francois; Duvauferrier, Regis; Burgun, Anita	2017	Journal of biomedical semantics	2041-1480	10.1186/s13326-016-0099-4	BACKGROUND: Biomedical ontologies aim at providing the most exhaustive and rigorous representation of reality as described by biomedical sciences. A large part of medical reasoning deals with diagnosis and is essentially probabilistic. It would be an asset for biomedical ontologies to be able to support such a probabilistic reasoning and formalize Bayesian indicators of performance: sensitivity, …
54	An analysis of FMA using structural self-bisimilarity.	Luo, Lingyun; Mejino, Jose L. V. Jr; Zhang, Guo-Qiang	2013	Journal of biomedical informatics	1532-0480 1532-0464	10.1016/j.jbi.2013.03.005	As ontologies are mostly manually created, they tend to contain errors and inconsistencies. In this paper, we present an automated computational method to audit symmetric concepts in ontologies by leveraging self-bisimilarity and linguistic structure in the concept names. Two concepts A and B are symmetric if concept B can be obtained from concept A by replacing a single modifier such as "left" w…
55	Development of a cardiac-centered frailty ontology.	Doing-Harris, Kristina; Bray, Bruce E.; Thackeray, Anne; Shah, Rashmee U.; Shao, Yijun; Cheng, Yan; Zeng-Treitler, Qing; Garvin, Jennifer H.; Weir, Charlene	2019	Journal of biomedical semantics	2041-1480	10.1186/s13326-019-0195-3	BACKGROUND: A Cardiac-centered Frailty Ontology can be an important foundation for using NLP to assess patient frailty. Frailty is an important consideration when making patient treatment decisions, particularly in older adults, those with a cardiac diagnosis, or when major surgery is a consideration. Clinicians often report patient's frailty in progress notes and other documentation. Frailty is …
56	Information and organization in public health institutes: an ontology-based modeling of the entities in the reception-analysis-report phases.	Pozza, Giandomenico; Borgo, Stefano; Oltramari, Alessandro; Contalbrigo, Laura; Marangon, Stefano	2016	Journal of biomedical semantics	2041-1480	10.1186/s13326-016-0095-8	BACKGROUND: Ontologies are widely used both in the life sciences and in the management of public and private companies. Typically, the different offices in an organization develop their own models and related ontologies to capture specific tasks and goals. Although there might be an overall coordination, the use of distinct ontologies can jeopardize the integration of data across the organization…
57	Semantic enrichment of clinical models towards semantic interoperability. The heart failure summary use case.	Martinez-Costa, Catalina; Cornet, Ronald; Karlsson, Daniel; Schulz, Stefan; Kalra, Dipak	2015	Journal of the American Medical Informatics Association : JAMIA	1527-974X 1067-5027	10.1093/jamia/ocu013	OBJECTIVE: To improve semantic interoperability of electronic health records (EHRs) by ontology-based mediation across syntactically heterogeneous representations of the same or similar clinical information. MATERIALS AND METHODS: Our approach is based on a semantic layer that consists of: (1) a set of ontologies supported by (2) a set of semantic patterns. The first aspect of the semantic layer …
58	Generating a focused view of disease ontology cancer terms for pan-cancer data integration and analysis.	Wu, Tsung-Jung; Schriml, Lynn M.; Chen, Qing-Rong; Colbert, Maureen; Crichton, Daniel J.; Finney, Richard; Hu, Ying; Kibbe, Warren A.; Kincaid, Heather; Meerzaman, Daoud; Mitraka, Elvira; Pan, Yang; Smith, Krista M.; Srivastava, Sudhir; Ward, Sari; Yan, Cheng; Mazumder, Raja	2015	Database : the journal of biological databases and curation	1758-0463 1758-0463	10.1093/database/bav032	Bio-ontologies provide terminologies for the scientific community to describe biomedical entities in a standardized manner. There are multiple initiatives that are developing biomedical terminologies for the purpose of providing better annotation, data integration and mining capabilities. Terminology resources devised for multiple purposes inherently diverge in content and structure. A major issu…
59	Bi-directional semantic similarity for gene ontology to optimize biological and clinical analyses.	Bien, Sang Jay; Park, Chan Hee; Shim, Hae Jin; Yang, Woongcheol; Kim, Jihun; Kim, Ju Han	2012	Journal of the American Medical Informatics Association : JAMIA	1527-974X 1067-5027	10.1136/amiajnl-2011-000659	BACKGROUND: Semantic similarity analysis facilitates automated semantic explanations of biological and clinical data annotated by biomedical ontologies. Gene ontology (GO) has become one of the most important biomedical ontologies with a set of controlled vocabularies, providing rich semantic annotations for genes and molecular phenotypes for diseases. Current methods for measuring GO semantic si…
60	Development and application of an interaction network ontology for literature mining of vaccine-associated gene-gene interactions.	Hur, Junguk; Ozgur, Arzucan; Xiang, Zuoshuang; He, Yongqun	2015	Journal of biomedical semantics	2041-1480	10.1186/2041-1480-6-2	BACKGROUND: Literature mining of gene-gene interactions has been enhanced by ontology-based name classifications. However, in biomedical literature mining, interaction keywords have not been carefully studied and used beyond a collection of keywords. METHODS: In this study, we report the development of a new Interaction Network Ontology (INO) that classifies >800 interaction keywords and incorpor…
61	Experiences from the anatomy track in the ontology alignment evaluation initiative.	Dragisic, Zlatan; Ivanova, Valentina; Li, Huanyu; Lambrix, Patrick	2017	Journal of biomedical semantics	2041-1480	10.1186/s13326-017-0166-5	BACKGROUND: One of the longest running tracks in the Ontology Alignment Evaluation Initiative is the Anatomy track which focuses on aligning two anatomy ontologies. The Anatomy track was started in 2005. In 2005 and 2006 the task in this track was to align the Foundational Model of Anatomy and the OpenGalen Anatomy Model. Since 2007 the ontologies used in the track are the Adult Mouse Anatomy and…
62	My Corporis Fabrica: an ontology-based tool for reasoning and querying on complex anatomical models.	Palombi, Olivier; Ulliana, Federico; Favier, Valentin; Leon, Jean-Claude; Rousset, Marie-Christine	2014	Journal of biomedical semantics	2041-1480	10.1186/2041-1480-5-20	BACKGROUND: Multiple models of anatomy have been developed independently and for different purposes. In particular, 3D graphical models are specially useful for visualizing the different organs composing the human body, while ontologies such as FMA (Foundational Model of Anatomy) are symbolic models that provide a unified formal description of anatomy. Despite its comprehensive content concerning…
63	The Foundational Model of Anatomy in OWL 2 and its use.	Golbreich, Christine; Grosjean, Julien; Darmoni, Stefan Jacques	2013	Artificial intelligence in medicine	1873-2860 0933-3657	10.1016/j.artmed.2012.11.002	OBJECTIVE: The objective is to represent the Foundational Model of Anatomy (FMA) in the OWL 2 Web Ontology Language (informally OWL 2), and to use it in a European cross-lingual portal of health terminologies for indexing and searching Web resources. Formalizing the FMA in OWL 2 is essential for semantic interoperability, to improve its design, and to ensure its reliability and correctness, which…
64	Ontological labels for automated location of anatomical shape differences.	Steinert-Threlkeld, Shane; Ardekani, Siamak; Mejino, Jose L. V.; Detwiler, Landon Todd; Brinkley, James F.; Halle, Michael; Kikinis, Ron; Winslow, Raimond L.; Miller, Michael I.; Ratnanather, J. Tilak	2012	Journal of biomedical informatics	1532-0480 1532-0464	10.1016/j.jbi.2012.02.013	A method for automated location of shape differences in diseased anatomical structures via high resolution biomedical atlases annotated with labels from formal ontologies is described. In particular, a high resolution magnetic resonance image of the myocardium of the human left ventricle was segmented and annotated with structural terms from an extracted subset of the Foundational Model of Anatom…
65	Ontology-based approach for in vivo human connectomics: the medial Brodmann area 6 case study.	Moreau, Tristan; Gibaud, Bernard	2015	Frontiers in neuroinformatics	1662-5196 1662-5196	10.3389/fninf.2015.00009	Different non-invasive neuroimaging modalities and multi-level analysis of human connectomics datasets yield a great amount of heterogeneous data which are hard to integrate into an unified representation. Biomedical ontologies can provide a suitable integrative framework for domain knowledge as well as a tool to facilitate information retrieval, data sharing and data comparisons across scales, m…
66	An harmonised vocabulary for communicating and interchanging biofilms experimental results.	Sousa, Ana Margarida; Pereira, Maria Olivia; Azevedo, Nuno F.; Lourenco, Analia	2014	Journal of integrative bioinformatics	1613-4516 1613-4516	10.2390/biecoll-jib-2014-249	Biofilm studies are at the crossroads of Biology, Chemistry, Medicine, Material Science and Engineering, among other fields. Data harmonisation in Biofilms is therefore crucial to allow for researchers to collaborate, interchange, understand, and replicate studies at an inter-laboratory and inter-domain scale. The international Minimum Information About a Biofilms Experiment initiative has prepar…
67	Automatic Structuring of Ontology Terms Based on Lexical Granularity and Machine Learning: Algorithm Development and Validation.	Luo, Lingyun; Feng, Jingtao; Yu, Huijun; Wang, Jiaolong	2020	JMIR medical informatics	2291-9694	10.2196/22333	BACKGROUND: As the manual creation and maintenance of biomedical ontologies are labor-intensive, automatic aids are desirable in the lifecycle of ontology development. OBJECTIVE: Provided with a set of concept names in the Foundational Model of Anatomy (FMA), we propose an innovative method for automatically generating the taxonomy and the partonomy structures among them, respectively. METHODS: O…
68	Towards a Formal Representation of Processes and Objects Regarding the Delivery of Telehealth Services: The Telehealth Ontology (TEON).	Santana, Filipe; Schulz, Stefan; Campos, Amadeu; Novaes, Magdala A.	2015	Studies in health technology and informatics	1879-8365 0926-9630		This study introduces ontological aspects concerning the Telehealth Ontology (TEON), an ontology that represents formal-ontological content concerning the delivery of telehealth services. TEON formally represents the main services, actors and other entity types relevant to telehealth service delivery. TEON uses the upper level ontology BioTopLite2 and reuses content from the Ontology for Biomedic…
69	Information Model Construction of EBM Resources.	Zhu, Yanxin; Xu, Wei; Wang, Xia	2017	Studies in health technology and informatics	1879-8365 0926-9630		To build evidence-based medicine (EBM) databases in China, we developed a semantic structure of EBM database information model by top-level, middle-level, and bottom-level structure. Top-level structure was composed of three modules including Literature Characteristics, Treatment Process and Evidence Levels. We further specified each top-level module based on international and national metadata a…
71	TNM-O: ontology support for staging of malignant tumours.	Boeker, Martin; Franca, Fabio; Bronsert, Peter; Schulz, Stefan	2016	Journal of biomedical semantics	2041-1480	10.1186/s13326-016-0106-9	BACKGROUND: Objectives of this work are to (1) present an ontological framework for the TNM classification system, (2) exemplify this framework by an ontology for colon and rectum tumours, and (3) evaluate this ontology by assigning TNM classes to real world pathology data. METHODS: The TNM ontology uses the Foundational Model of Anatomy for anatomical entities and BioTopLite 2 as a domain top-le…
72	The Semanticscience Integrated Ontology (SIO) for biomedical research and knowledge discovery.	Dumontier, Michel; Baker, Christopher Jo; Baran, Joachim; Callahan, Alison; Chepelev, Leonid; Cruz-Toledo, Jose; Del Rio, Nicholas R.; Duck, Geraint; Furlong, Laura I.; Keath, Nichealla; Klassen, Dana; McCusker, James P.; Queralt-Rosinach, Nuria; Samwald, Matthias; Villanueva-Rosales, Natalia; Wilkinson, Mark D.; Hoehndorf, Robert	2014	Journal of biomedical semantics	2041-1480	10.1186/2041-1480-5-14	The Semanticscience Integrated Ontology (SIO) is an ontology to facilitate biomedical knowledge discovery. SIO features a simple upper level comprised of essential types and relations for the rich description of arbitrary (real, hypothesized, virtual, fictional) objects, processes and their attributes. SIO specifies simple design patterns to describe and associate qualities, capabilities, functio…
73	Assessing the impact of case sensitivity and term information gain on biomedical concept recognition.	Groza, Tudor; Verspoor, Karin	2015	PloS one	1932-6203 1932-6203	10.1371/journal.pone.0119091	Concept recognition (CR) is a foundational task in the biomedical domain. It supports the important process of transforming unstructured resources into structured knowledge. To date, several CR approaches have been proposed, most of which focus on a particular set of biomedical ontologies. Their underlying mechanisms vary from shallow natural language processing and dictionary lookup to specializ…
74	Ontology patterns for tabular representations of biomedical knowledge on neglected tropical diseases.	Santana, Filipe; Schober, Daniel; Medeiros, Zulma; Freitas, Fred; Schulz, Stefan	2011	Bioinformatics (Oxford, England)	1367-4811 1367-4803	10.1093/bioinformatics/btr226	MOTIVATION: Ontology-like domain knowledge is frequently published in a tabular format embedded in scientific publications. We explore the re-use of such tabular content in the process of building NTDO, an ontology of neglected tropical diseases (NTDs), where the representation of the interdependencies between hosts, pathogens and vectors plays a crucial role. RESULTS: As a proof of concept we an…
75	Developing a modular architecture for creation of rule-based clinical diagnostic criteria.	Hong, Na; Pathak, Jyotishman; Chute, Christopher G.; Jiang, Guoqian	2016	BioData mining	1756-0381 1756-0381	10.1186/s13040-016-0113-5	BACKGROUND: With recent advances in computerized patient records system, there is an urgent need for producing computable and standards-based clinical diagnostic criteria. Notably, constructing rule-based clinical diagnosis criteria has become one of the goals in the International Classification of Diseases (ICD)-11 revision. However, few studies have been done in building a unified architecture …
76	A Patient Safety Information Model for Interoperability.	Rodrigues, Jean Marie; Dhingra-Kumar, Neelam; Schulz, Stefan; Souvignet, Julien	2016	Studies in health technology and informatics	1879-8365 0926-9630		Current systems that target Patient Safety (PS) like mandatory reporting systems and specific vigilance reporting systems share the same information types but are not interoperable. Ten years ago, WHO embarked on an international project to standardize quality management information systems for PS. The goal is to support interoperability between different systems in a country and to expand intern…
80	Top-Level Design of a Normalized Chinese Clinical Terminology: An Integrated Application of National and International Data Standards and Terminologies.	Sun, Haixia; Ji, Yujing; Deng, Panpan; Li, Junlian; Ren, Huiling; Shen, Liu; Feng, Ming; Wang, Yi	2019	Studies in health technology and informatics	1879-8365 0926-9630	10.3233/SHTI190553	This work describes the design and building of a Chinese clinical terminology (called CCTS). The terminology is similar to an ontology, and will promote the use of Chinese clinical data, such as indexing, retrieval and exchange. The terminology is a TOPL concept framework, which integrates hierarchical structures of Chinese and interenational reference terminology standards for health. Our framew…
81	Comparative analysis of knowledge representation and reasoning requirements across a range of life sciences textbooks.	Chaudhri, Vinay K.; Elenius, Daniel; Goldenkranz, Andrew; Gong, Allison; Martone, Maryann E.; Webb, William; Yorke-Smith, Neil	2014	Journal of biomedical semantics	2041-1480	10.1186/2041-1480-5-51	BACKGROUND: Using knowledge representation for biomedical projects is now commonplace. In previous work, we represented the knowledge found in a college-level biology textbook in a fashion useful for answering questions. We showed that embedding the knowledge representation and question-answering abilities in an electronic textbook helped to engage student interest and improve learning. A natural…
82	Development of ICD-10-TM ontology for a semi-automated morbidity coding system in Thailand.	Nitsuwat, S.; Paoin, W.	2012	Methods of information in medicine	2511-705X 0026-1270	10.3414/ME11-02-0024	OBJECTIVES: The International Classification of Diseases and Related Health Problems, 10th Revision, Thai Modification (ICD-10-TM) ontology is a knowledge base created from the Thai modification of the World Health Organization International Classification of Diseases and Related Health Problems, 10th Revision. The objectives of this research were to develop the ICD-10-TM ontology as a knowledge …
83	Design Considerations for a Knowledge Graph: The WATRIMed Use Case.	Some, Borlli Michel Jonas; Bordea, Georgeta; Thiessard, Frantz; Schulz, Stefan; Diallo, Gayo	2019	Studies in health technology and informatics	1879-8365 0926-9630		The World Health Organization estimates that as much as 80% of the population uses Traditional Medicine (TM) in some form, and in particular, herbal-based Traditional Medicine (HTM). However, TM is mostly orally transmitted and suffers from lack of standardizations and lack of computable TM data. Shareable standards could enable computational support of TM data management. In this paper, we outli…
84	Building a drug ontology based on RxNorm and other sources.	Hanna, Josh; Joseph, Eric; Brochhausen, Mathias; Hogan, William R.	2013	Journal of biomedical semantics	2041-1480	10.1186/2041-1480-4-44	BACKGROUND: We built the Drug Ontology (DrOn) because we required correct and consistent drug information in a format for use in semantic web applications, and no existing resource met this requirement or could be altered to meet it. One of the obstacles we faced when creating DrOn was the difficulty in reusing drug information from existing sources. The primary external source we have used at th…
85	Development of terminology for mammographic techniques for radiological technologists.	Yagahara, Ayako; Yokooka, Yuki; Tsuji, Shintaro; Nishimoto, Naoki; Uesugi, Masahito; Muto, Hiroshi; Ohba, Hisateru; Kurowarabi, Kunio; Ogasawara, Katsuhiko	2011	Radiological physics and technology	1865-0341 1865-0333	10.1007/s12194-011-0114-5	We are developing a mammographic ontology to share knowledge of the mammographic domain for radiologic technologists, with the aim of improving mammographic techniques. As a first step in constructing the ontology, we used mammography reference books to establish mammographic terminology for identifying currently available knowledge. This study proceeded in three steps: (1) determination of the d…
86	Towards a foundational representation of potential drug-drug interaction knowledge.	Brochhausen, Mathias; Schneider, Jodi; Malone, Daniel; Empey, Philip E.; Hogan, William R.; Boyce, Richard D.	2014	CEUR workshop proceedings	1613-0073 1613-0073		Inadequate representation of evidence and knowledge about potential drug-drug interactions is a major factor underlying disagreements among sources of drug information that are used by clinicians. In this paper we describe the initial steps toward developing a foundational domain representation that allows tracing the evidence underlying potential drug-drug interaction knowledge. The new represen…
87	A chemical specialty semantic network for the Unified Medical Language System.	Morrey, C. Paul; Perl, Yehoshua; Halper, Michael; Chen, Ling; Gu, Huanying Helen	2012	Journal of cheminformatics	1758-2946 1758-2946	10.1186/1758-2946-4-9	BACKGROUND: Terms representing chemical concepts found the Unified Medical Language System (UMLS) are used to derive an expanded semantic network with mutually exclusive semantic types. The UMLS Semantic Network (SN) is composed of a collection of broad categories called semantic types (STs) that are assigned to concepts. Within the UMLS's coverage of the chemical domain, we find a great deal of …
88	Implementation of ontology-based clinical decision support system for management of interactions between antihypertensive drugs and diet.	Park, Jeong Eun; Kim, Hwa Sun; Chang, Min Jung; Hong, Hae Sook	2014	Journal of Korean Academy of Nursing	2093-758X 2005-3673	10.4040/jkan.2014.44.3.294	PURPOSE: The influence of dietary composition on blood pressure is an important subject in healthcare. Interactions between antihypertensive drugs and diet (IBADD) is the most important factor in the management of hypertension. It is therefore essential to support healthcare providers' decision making role in active and continuous interaction control in hypertension management. The aim of this st…
89	An ontological framework for the formalization, organization and usage of TCM-Knowledge.	Long, Hai; Zhu, Yan; Jia, Lirong; Gao, Bo; Liu, Jing; Liu, Lihong; Herre, Heinrich	2019	BMC medical informatics and decision making	1472-6947 1472-6947	10.1186/s12911-019-0760-9	BACKGROUND: The traditional Chinese Medicine Language System (TCMLS) is a large-scale terminology system, developed from 2002 on by the Institute of Information of Traditional Chinese Medicine (IITCM). Until now, more than 120,000 concepts, 300,000 terms and 1.27 million semantic relational links are included. Its top-level framework, called TCMLS-semantic network (SN), provides an important basi…
90	Ontology-Based Approach to Social Data Sentiment Analysis: Detection of Adolescent Depression Signals.	Jung, Hyesil; Park, Hyeoun-Ae; Song, Tae-Min	2017	Journal of medical Internet research	1438-8871 1438-8871	10.2196/jmir.7452	BACKGROUND: Social networking services (SNSs) contain abundant information about the feelings, thoughts, interests, and patterns of behavior of adolescents that can be obtained by analyzing SNS postings. An ontology that expresses the shared concepts and their relationships in a specific field could be used as a semantic framework for social media data analytics. OBJECTIVE: The aim of this study …
91	An ontologically founded architecture for information systems in clinical and epidemiological research.	Uciteli, Alexandr; Gross, Silvia; Kireyev, Sergej; Herre, Heinrich	2011	Journal of biomedical semantics	2041-1480	10.1186/2041-1480-2-S4-S1	This paper presents an ontologically founded basic architecture for information systems, which are intended to capture, represent, and maintain metadata for various domains of clinical and epidemiological research. Clinical trials exhibit an important basis for clinical research, and the accurate specification of metadata and their documentation and application in clinical and epidemiological stu…
92	Partial sequencing of the bottle gourd genome reveals markers useful for phylogenetic analysis and breeding.	Xu, Pei; Wu, Xiaohua; Luo, Jie; Wang, Baogen; Liu, Yonghua; Ehlers, Jeffrey D.; Wang, Sha; Lu, Zhongfu; Li, Guojing	2011	BMC genomics	1471-2164 1471-2164	10.1186/1471-2164-12-467	BACKGROUND: Bottle gourd [Lagenaria siceraria (Mol.) Standl.] is an important cucurbit crop worldwide. Archaeological research indicates that bottle gourd was domesticated more than 10,000 years ago, making it one of the earliest plants cultivated by man. In spite of its widespread importance and long history of cultivation almost nothing has been known about the genome of this species thus far. …
93	GOcats: A tool for categorizing Gene Ontology into subgraphs of user-defined concepts.	Hinderer, Eugene W. 3rd; Moseley, Hunter N. B.	2020	PloS one	1932-6203 1932-6203	10.1371/journal.pone.0233311	Gene Ontology is used extensively in scientific knowledgebases and repositories to organize a wealth of biological information. However, interpreting annotations derived from differential gene lists is often difficult without manually sorting into higher-order categories. To address these issues, we present GOcats, a novel tool that organizes the Gene Ontology (GO) into subgraphs representing use…
94	Integrating social context into comprehensive shared care plans: A scoping review.	Sullivan, Suzanne S.; Mistretta, Francine; Casucci, Sabrina; Hewner, Sharon	2017	Nursing outlook	1528-3968 0029-6554	10.1016/j.outlook.2017.01.014	BACKGROUND: Failure to address social determinants of health (SDH) may contribute to the problem of readmissions in high-risk individuals. Comprehensive shared care plans (CSCP) may improve care continuity and health outcomes by communicating SDH risk factors across settings. PURPOSE: The purpose of this study to evaluate the state of knowledge for integrating SDH into a CSCP. Our scoping review …
95	Development of an obesity management ontology based on the nursing process for the mobile-device domain.	Kim, Hyun-Young; Park, Hyeoun-Ae; Min, Yul Ha; Jeon, Eunjoo	2013	Journal of medical Internet research	1438-8871 1438-8871	10.2196/jmir.2512	BACKGROUND: Lifestyle modification is the most important factor in the management of obesity. It is therefore essential to enhance client participation in voluntary and continuous weight control. OBJECTIVE: The aim of this study was to develop an obesity management ontology for application in the mobile-device domain. We considered the concepts of client participation in behavioral modification f…
96	Evaluation Results of an Ontology-based Design Model of Virtual Environments for Upper Limb Motor Rehabilitation of Stroke Patients.	Ramirez-Fernandez, Cristina; Moran, Alberto L.; Garcia-Canseco, Eloisa; Gomez-Montalvo, Jorge R.	2017	Methods of information in medicine	2511-705X 0026-1270	10.3414/ME16-02-0017	OBJECTIVES: 1) To enhance the content of an ontology for designing virtual environments (VEs) for upper limb motor rehabilitation of stroke patients according to the suggestions and comments of rehabilitation specialists and software developers, 2) to characterize the perceived importance level of the ontology, 3) to determine the perceived usefulness of the ontology, and 4) to identify the safet…
97	Levels and building blocks-toward a domain granularity framework for the life sciences.	Vogt, Lars	2019	Journal of biomedical semantics	2041-1480	10.1186/s13326-019-0196-2	BACKGROUND: With the emergence of high-throughput technologies, Big Data and eScience, the use of online data repositories and the establishment of new data standards that require data to be computer-parsable become increasingly important. As a consequence, there is an increasing need for an integrated system of hierarchies of levels of different types of material entities that helps with organiz…
98	Concept mapping One-Carbon Metabolism to model future ontologies for nutrient-gene-phenotype interactions.	Joslin, A. C.; Green, R.; German, J. B.; Lange, M. C.	2014	Genes & nutrition	1555-8932 1555-8932	10.1007/s12263-014-0419-1	Advances in the development of bioinformatic tools continue to improve investigators' ability to interrogate, organize, and derive knowledge from large amounts of heterogeneous information. These tools often require advanced technical skills not possessed by life scientists. User-friendly, low-barrier-to-entry methods of visualizing nutrigenomics information are yet to be developed. We utilized c…
99	Faceted visualization of three dimensional neuroanatomy by combining ontology with faceted search.	Veeraraghavan, Harini; Miller, James V.	2014	Neuroinformatics	1559-0089 1539-2791	10.1007/s12021-013-9202-5	In this work, we present a faceted-search based approach for visualization of anatomy by combining a three dimensional digital atlas with an anatomy ontology. Specifically, our approach provides a drill-down search interface that exposes the relevant pieces of information (obtained by searching the ontology) for a user query. Hence, the user can produce visualizations starting with minimally spec…
101	Biomedical ontology alignment: an approach based on representation learning.	Kolyvakis, Prodromos; Kalousis, Alexandros; Smith, Barry; Kiritsis, Dimitris	2018	Journal of biomedical semantics	2041-1480	10.1186/s13326-018-0187-8	BACKGROUND: While representation learning techniques have shown great promise in application to a number of different NLP tasks, they have had little impact on the problem of ontology matching. Unlike past work that has focused on feature engineering, we present a novel representation learning approach that is tailored to the ontology matching task. Our approach is based on embedding ontological …
102	Human Development Domain of the Ontology of Craniofacial Development and Malformation.	Mejino, Jose Lv Jr; Travillian, Ravensara S.; Cox, Timothy C.; Shapiro, Linda G.; Brinkley, James F.	2013	CEUR workshop proceedings	1613-0073 1613-0073		In this paper we describe an ontological scheme for representing anatomical entities undergoing morphological transformation and changes in phenotype during prenatal development. This is a proposed component of the Anatomical Transformation Abstraction (ATA) of the Foundational Model of Anatomy (FMA) Ontology that was created to provide an ontological framework for capturing knowledge about human…
103	The Zebrafish Information Network: new support for non-coding genes, richer Gene Ontology annotations and the Alliance of Genome Resources.	Ruzicka, Leyla; Howe, Douglas G.; Ramachandran, Sridhar; Toro, Sabrina; Van Slyke, Ceri E.; Bradford, Yvonne M.; Eagle, Anne; Fashena, David; Frazer, Ken; Kalita, Patrick; Mani, Prita; Martin, Ryan; Moxon, Sierra Taylor; Paddock, Holly; Pich, Christian; Schaper, Kevin; Shao, Xiang; Singer, Amy; Westerfield, Monte	2019	Nucleic acids research	1362-4962 0305-1048	10.1093/nar/gky1090	The Zebrafish Information Network (ZFIN) (https://zfin.org/) is the database for the model organism, zebrafish (Danio rerio). ZFIN expertly curates, organizes and provides a wide array of zebrafish genetic and genomic data, including genes, alleles, transgenic lines, gene expression, gene function, mutant phenotypes, orthology, human disease models, nomenclature and reagents. New features at ZFIN…
104	Neuroanatomical domain of the foundational model of anatomy ontology.	Nichols, B. Nolan; Mejino, Jose Lv; Detwiler, Landon T.; Nilsen, Trond T.; Martone, Maryann E.; Turner, Jessica A.; Rubin, Daniel L.; Brinkley, James F.	2014	Journal of biomedical semantics	2041-1480	10.1186/2041-1480-5-1	BACKGROUND: The diverse set of human brain structure and function analysis methods represents a difficult challenge for reconciling multiple views of neuroanatomical organization. While different views of organization are expected and valid, no widely adopted approach exists to harmonize different brain labeling protocols and terminologies. Our approach uses the natural organizing framework provi…
105	Biological Model Development as an Opportunity to Provide Content Auditing for the Foundational Model of Anatomy Ontology.	Wang, Lucy L.; Grunblatt, Eli; Jung, Hyunggu; Kalet, Ira J.; Whipple, Mark E.	2015	AMIA ... Annual Symposium proceedings. AMIA Symposium	1942-597X 1559-4076		Constructing a biological model using an established ontology provides a unique opportunity to perform content auditing on the ontology. We built a Markov chain model to study tumor metastasis in the regional lymphatics of patients with head and neck squamous cell carcinoma (HNSCC). The model attempts to determine regions with high likelihood for metastasis, which guides surgeons and radiation on…
106	The ontology of craniofacial development and malformation for translational craniofacial research.	Brinkley, J. F.; Borromeo, C.; Clarkson, M.; Cox, T. C.; Cunningham, M. J.; Detwiler, L. T.; Heike, C. L.; Hochheiser, H.; Mejino, J. L. V.; Travillian, R. S.; Shapiro, L. G.	2013	American journal of medical genetics. Part C, Seminars in medical genetics	1552-4876 1552-4868	10.1002/ajmg.c.31377	We introduce the Ontology of Craniofacial Development and Malformation (OCDM) as a mechanism for representing knowledge about craniofacial development and malformation, and for using that knowledge to facilitate integrating craniofacial data obtained via multiple techniques from multiple labs and at multiple levels of granularity. The OCDM is a project of the NIDCR-sponsored FaceBase Consortium, …
107	From frames to OWL2: Converting the Foundational Model of Anatomy.	Detwiler, Landon T.; Mejino, Jose L. V.; Brinkley, James F.	2016	Artificial intelligence in medicine	1873-2860 0933-3657	10.1016/j.artmed.2016.04.003	OBJECTIVE: The Foundational Model of Anatomy (FMA) [Rosse C, Mejino JLV. A reference ontology for bioinformatics: the Foundational Model of Anatomy. J. Biomed. Inform. 2003;36:478-500] is an ontology that represents canonical anatomy at levels ranging from the entire body to biological macromolecules, and has rapidly become the primary reference ontology for human anatomy, and a template for mode…
108	OWL2 benchmarking for the evaluation of knowledge based systems.	Khan, Sher Afgun; Qadir, Muhammad Abdul; Abbas, Muhammad Azeem; Afzal, Muhammad Tanvir	2017	PloS one	1932-6203 1932-6203	10.1371/journal.pone.0179578	OWL2 semantics are becoming increasingly popular for the real domain applications like Gene engineering and health MIS. The present work identifies the research gap that negligible attention has been paid to the performance evaluation of Knowledge Base Systems (KBS) using OWL2 semantics. To fulfil this identified research gap, an OWL2 benchmark for the evaluation of KBS is proposed. The proposed …
109	Dissecting the Ambiguity of FMA Concept Names Using Taxonomy and Partonomy Structural Information.	Luo, Lingyun; Xu, Rong; Zhang, Guo-Qiang	2013	AMIA Joint Summits on Translational Science proceedings. AMIA Joint Summits on Translational Science	2153-4063		The complex inner structures of concept names in the Foundational Model of Anatomy (FMA) remain an obstacle for further analyzing the ontology using lexical methods. A very common problem is the ambiguity lying in names with the sometimes multiple occurrences of the preposition "of." In this paper, we propose an automatic method to help disambiguating FMA terms by leveraging the taxonomy and part…
110	Quantitative imaging biomarker ontology (QIBO) for knowledge representation of biomedical imaging biomarkers.	Buckler, Andrew J.; Liu, Tiffany Ting; Savig, Erica; Suzek, Baris E.; Rubin, Daniel L.; Paik, David	2013	Journal of digital imaging	1618-727X 0897-1889	10.1007/s10278-013-9599-2	A widening array of novel imaging biomarkers is being developed using ever more powerful clinical and preclinical imaging modalities. These biomarkers have demonstrated effectiveness in quantifying biological processes as they occur in vivo and in the early prediction of therapeutic outcomes. However, quantitative imaging biomarker data and knowledge are not standardized, representing a critical …
111	Transcriptional profiles of supragranular-enriched genes associate with corticocortical network architecture in the human brain.	Krienen, Fenna M.; Yeo, B. T. Thomas; Ge, Tian; Buckner, Randy L.; Sherwood, Chet C.	2016	Proceedings of the National Academy of Sciences of the United States of America	1091-6490 0027-8424	10.1073/pnas.1510903113	The human brain is patterned with disproportionately large, distributed cerebral networks that connect multiple association zones in the frontal, temporal, and parietal lobes. The expansion of the cortical surface, along with the emergence of long-range connectivity networks, may be reflected in changes to the underlying molecular architecture. Using the Allen Institute's human brain transcriptio…
112	Hybrid Model-Based Emotion Contextual Recognition for Cognitive Assistance Services.	Ayari, N.; Abdelkawy, H.; Chibani, A.; Amirat, Y.	2020	IEEE transactions on cybernetics	2168-2275 2168-2267	10.1109/TCYB.2020.3013112	Endowing ubiquitous robots with cognitive capabilities for recognizing emotions, sentiments, affects, and moods of humans in their context is an important challenge, which requires sophisticated and novel approaches of emotion recognition. Most studies explore data-driven pattern recognition techniques that are generally highly dependent on learning data and insufficiently effective for emotion c…
113	Transcriptional abnormalities of hamstring muscle contractures in children with cerebral palsy.	Smith, Lucas R.; Chambers, Henry G.; Subramaniam, Shankar; Lieber, Richard L.	2012	PloS one	1932-6203 1932-6203	10.1371/journal.pone.0040686	Cerebral palsy (CP) is an upper motor neuron disease that results in a spectrum of movement disorders. Secondary to the neurological lesion, muscles from patients with CP are often spastic and form debilitating contractures that limit range of motion and joint function. With no genetic component, the pathology of skeletal muscle in CP is a response to aberrant complex neurological input in ways t…
114	NEO: Systematic Non-Lattice Embedding of Ontologies for Comparing the Subsumption Relationship in SNOMED CT and in FMA Using MapReduce.	Zhu, Wei; Zhang, Guo-Qiang; Tao, Shiqiang; Sun, Mengmeng; Cui, Licong	2015	AMIA Joint Summits on Translational Science proceedings. AMIA Joint Summits on Translational Science	2153-4063		A structural disparity of the subsumption relationship between FMA and SNOMED CT's Body Structure sub-hierarchy is that while the is-a relation in FMA has a tree structure, the corresponding relation in Body Structure is not even a lattice. This paper introduces a method called NEO, for non-lattice embedding of FMA fragments into the Body Structure sub-hierarchy to understand (1) this structural …
115	Changes in ambient temperature are the prevailing cue in determining Brachypodium distachyon diurnal gene regulation.	MacKinnon, Kirk J.-M.; Cole, Benjamin J.; Yu, Chang; Coomey, Joshua H.; Hartwick, Nolan T.; Remigereau, Marie-Stanislas; Duffy, Tomas; Michael, Todd P.; Kay, Steve A.; Hazen, Samuel P.	2020	The New phytologist	1469-8137 0028-646X	10.1111/nph.16507	Plants are continuously exposed to diurnal fluctuations in light and temperature, and spontaneous changes in their physical or biotic environment. The circadian clock coordinates regulation of gene expression with a 24 h period, enabling the anticipation of these events. We used RNA sequencing to characterize the Brachypodium distachyon transcriptome under light and temperature cycles, as well as…
116	Transcriptome analysis of gene expression in Chlorella vulgaris under salt stress.	Abdellaoui, Najib; Kim, Min Jeong; Choi, Tae Jin	2019	World journal of microbiology & biotechnology	1573-0972 0959-3993	10.1007/s11274-019-2718-6	Chlorella vulgaris is an important freshwater alga that is widely used as a food source for humans and animals. High-salinity environments can cause accumulation of lipids and proteins in this species, but the mechanism of this accumulation and the salt response remain unclear. In this work, transcriptome analysis was performed for the C. vulgaris response to salt stress (1% and 3% NaCl) applied …
117	Developmental Transcriptome for a Facultatively Eusocial Bee, Megalopta genalis.	Jones, Beryl M.; Wcislo, William T.; Robinson, Gene E.	2015	G3 (Bethesda, Md.)	2160-1836 2160-1836	10.1534/g3.115.021261	Transcriptomes provide excellent foundational resources for mechanistic and evolutionary analyses of complex traits. We present a developmental transcriptome for the facultatively eusocial bee Megalopta genalis, which represents a potential transition point in the evolution of eusociality. A de novo transcriptome assembly of Megalopta genalis was generated using paired-end Illumina sequencing and…
118	Translating the Foundational Model of Anatomy into French using knowledge-based and lexical methods.	Merabti, Tayeb; Soualmia, Lina F.; Grosjean, Julien; Palombi, Olivier; Muller, Jean-Michel; Darmoni, Stefan J.	2011	BMC medical informatics and decision making	1472-6947 1472-6947	10.1186/1472-6947-11-65	BACKGROUND: The Foundational Model of Anatomy (FMA) is the reference ontology regarding human anatomy. FMA vocabulary was integrated into the Health Multi Terminological Portal (HMTP) developed by CISMeF based on the CISMeF Information System which also includes 26 other terminologies and controlled vocabularies, mainly in French. However, FMA is primarily in English. In this context, the transla…
119	De novo assembly and characterization of the transcriptome of the toxic dinoflagellate Karenia brevis.	Ryan, Darcie E.; Pepper, Alan E.; Campbell, Lisa	2014	BMC genomics	1471-2164 1471-2164	10.1186/1471-2164-15-888	BACKGROUND: Karenia brevis is a harmful algal species that blooms in the Gulf of Mexico and produces brevetoxins that cause neurotoxic shellfish poisoning. Elevated brevetoxin levels in K. brevis cells have been measured during laboratory hypo-osmotic stress treatments. To investigate mechanisms underlying K. brevis osmoacclimation and osmoregulation and establish a valuable resource for gene dis…
120	RNA-seq analyses reveal that cervical spinal cords and anterior motor neurons from amyotrophic lateral sclerosis subjects show reduced expression of mitochondrial DNA-encoded respiratory genes, and rhTFAM may correct this respiratory deficiency.	Ladd, Amy C.; Brohawn, David G.; Thomas, Ravindar R.; Keeney, Paula M.; Berr, Stuart S.; Khan, Shaharyar M.; Portell, Francisco R.; Shakenov, Meiram Zh; Antkowiak, Patrick F.; Kundu, Bijoy; Tustison, Nicholas; Bennett, James P.	2017	Brain research	1872-6240 0006-8993	10.1016/j.brainres.2017.05.010	Amyotrophic lateral sclerosis (ALS) is a generally fatal neurodegenerative disease of adults that produces weakness and atrophy due to dysfunction and death of upper and lower motor neurons. We used RNA-sequencing (RNA-seq) to analyze expression of all mitochondrial DNA (mtDNA)-encoded respiratory genes in ALS and CTL human cervical spinal cords (hCSC) and isolated motor neurons. We analyzed with…
121	Constitutional Mosaic Trisomy 13 in Two Germ Cell Layers is Different from Patau Syndrome? A Case Report.	Kunwar, Fulesh; Pandya, Vidhi; Bakshi, Sonal R.	2016	Journal of clinical and diagnostic research : JCDR	2249-782X 0973-709X	10.7860/JCDR/2016/15659.7414	The heterogeneous phenotype of known syndromes is a clinical challenge, and harmonized description using globally accepted ontology is desirable. This report attempts phenotypic analysis in a patient of constitutional mosaic trisomy 13 in mesoderm and ectoderm to make globally comparable clinical description. Phenotypic features (minor/major abnormalities) were recorded and matched with the Human…
122	Exploring information from the topology beneath the Gene Ontology terms to improve semantic similarity measures.	Zhang, Shu-Bo; Lai, Jian-Huang	2016	Gene	1879-0038 0378-1119	10.1016/j.gene.2016.04.024	Measuring the similarity between pairs of biological entities is important in molecular biology. The introduction of Gene Ontology (GO) provides us with a promising approach to quantifying the semantic similarity between two genes or gene products. This kind of similarity measure is closely associated with the GO terms annotated to biological entities under consideration and the structure of the …
123	Digital gene expression analysis in mice lung with coinfection of influenza and streptococcus pneumoniae.	Luo, Jun; Zhou, Linlin; Wang, Hongren; Qin, Zhen; Xiang, Li; Zhu, Jie; Huang, Xiaojun; Yang, Yuan; Li, Wanyi; Wang, Baoning; Li, Mingyuan	2017	Oncotarget	1949-2553 1949-2553	10.18632/oncotarget.23104	Influenza A virus (IAV) and Streptococcus pneumoniae (SP) are two major upper respiratory tract pathogens that can also cause infection in polarized bronchial epithelial cells to exacerbate disease in coinfected individuals which may result in significant morbidity. However, the underlying molecular mechanism is poorly understood. Here, we employed BALB/c ByJ mice inflected with SP, IAV, IAV foll…
124	The Chinchilla Research Resource Database: resource for an otolaryngology disease model.	Shimoyama, Mary; Smith, Jennifer R.; De Pons, Jeff; Tutaj, Marek; Khampang, Pawjai; Hong, Wenzhou; Erbe, Christy B.; Ehrlich, Garth D.; Bakaletz, Lauren O.; Kerschner, Joseph E.	2016	Database : the journal of biological databases and curation	1758-0463 1758-0463	10.1093/database/baw073	The long-tailed chinchilla (Chinchilla lanigera) is an established animal model for diseases of the inner and middle ear, among others. In particular, chinchilla is commonly used to study diseases involving viral and bacterial pathogens and polymicrobial infections of the upper respiratory tract and the ear, such as otitis media. The value of the chinchilla as a model for human diseases prompted …
125	LungMAP: The Molecular Atlas of Lung Development Program.	Ardini-Poleske, Maryanne E.; Clark, Robert F.; Ansong, Charles; Carson, James P.; Corley, Richard A.; Deutsch, Gail H.; Hagood, James S.; Kaminski, Naftali; Mariani, Thomas J.; Potter, Steven S.; Pryhuber, Gloria S.; Warburton, David; Whitsett, Jeffrey A.; Palmer, Scott M.; Ambalavanan, Namasivayam	2017	American journal of physiology. Lung cellular and molecular physiology	1522-1504 1040-0605	10.1152/ajplung.00139.2017	The National Heart, Lung, and Blood Institute is funding an effort to create a molecular atlas of the developing lung (LungMAP) to serve as a research resource and public education tool. The lung is a complex organ with lengthy development time driven by interactive gene networks and dynamic cross talk among multiple cell types to control and coordinate lineage specification, cell proliferation, …
126	Shoot transcriptome of the giant reed, Arundo donax.	Barrero, Roberto A.; Guerrero, Felix D.; Moolhuijzen, Paula; Goolsby, John A.; Tidwell, Jason; Bellgard, Stanley E.; Bellgard, Matthew I.	2015	Data in brief	2352-3409 2352-3409	10.1016/j.dib.2014.12.007	The giant reed, Arundo donax, is a perennial grass species that has become an invasive plant in many countries. Expansive stands of A. donax have significant negative impacts on available water resources and efforts are underway to identify biological control agents against this species. The giant reed grows under adverse environmental conditions, displaying insensitivity to drought stress, flood…
127	Spatial-symbolic Query Engine in Anatomy.	Puget, A.; Mejino, J. L. V. Jr; Detwiler, L. T.; Franklin, J. D.; Brinkley, J. F.	2012	Methods of information in medicine	2511-705X 0026-1270	10.3414/ME11-01-0047	OBJECTIVES: Currently, the primary means for answering anatomical questions such as 'what vital organs would potentially be impacted by a bullet wound to the abdomen?' is to look them up in textbooks or to browse online sources. In this work we describe a semantic web service and spatial query processor that permits a user to graphically pose such questions as joined queries over separately defin…
128	Proteomic Responses of Switchgrass and Prairie Cordgrass to Senescence.	Paudel, Bimal; Das, Aayudh; Tran, Michaellong; Boe, Arvid; Palmer, Nathan A.; Sarath, Gautam; Gonzalez-Hernandez, Jose L.; Rushton, Paul J.; Rohila, Jai S.	2016	Frontiers in plant science	1664-462X 1664-462X	10.3389/fpls.2016.00293	Senescence in biofuel grasses is a critical issue because early senescence decreases potential biomass production by limiting aerial growth and development. 2-Dimensional, differential in-gel electrophoresis (2D-DIGE) followed by mass spectrometry of selected protein spots was used to evaluate differences between leaf proteomes of early (ES)- and late- senescing (LS) genotypes of Prairie cordgras…
129	Minimum Information about a Genotyping Experiment (MIGEN).	Huang, Jie; Mirel, Daniel; Pugh, Elizabeth; Xing, Chao; Robinson, Peter N.; Pertsemlidis, Alexander; Ding, Lianghao; Kozlitina, Julia; Maher, Joseph; Rios, Jonathan; Story, Michael; Marthandan, Nishanth; Scheuermann, Richard H.	2011	Standards in genomic sciences	1944-3277 1944-3277	10.4056/sigs.1994602	Genotyping experiments are widely used in clinical and basic research laboratories to identify associations between genetic variations and normal/abnormal phenotypes. Genotyping assay techniques vary from single genomic regions that are interrogated using PCR reactions to high throughput assays examining genome-wide sequence and structural variation. The resulting genotype data may include millio…
130	Cell cycle gene expression networks discovered using systems biology: Significance in carcinogenesis.	Scott, Robert E.; Ghule, Prachi N.; Stein, Janet L.; Stein, Gary S.	2015	Journal of cellular physiology	1097-4652 0021-9541	10.1002/jcp.24990	The early stages of carcinogenesis are linked to defects in the cell cycle. A series of cell cycle checkpoints are involved in this process. The G1/S checkpoint that serves to integrate the control of cell proliferation and differentiation is linked to carcinogenesis and the mitotic spindle checkpoint is associated with the development of chromosomal instability. This paper presents the outcome o…
131	Commensal microbiota modulate gene expression in the skin.	Meisel, Jacquelyn S.; Sfyroera, Georgia; Bartow-McKenney, Casey; Gimblet, Ciara; Bugayev, Julia; Horwinski, Joseph; Kim, Brian; Brestoff, Jonathan R.; Tyldsley, Amanda S.; Zheng, Qi; Hodkinson, Brendan P.; Artis, David; Grice, Elizabeth A.	2018	Microbiome	2049-2618 2049-2618	10.1186/s40168-018-0404-9	BACKGROUND: The skin harbors complex communities of resident microorganisms, yet little is known of their physiological roles and the molecular mechanisms that mediate cutaneous host-microbe interactions. Here, we profiled skin transcriptomes of mice reared in the presence and absence of microbiota to elucidate the range of pathways and functions modulated in the skin by the microbiota. RESULTS: …
132	Identification of AflR Binding Sites in the Genome of Aspergillus flavus by ChIP-Seq.	Kong, Qing; Chang, Perng-Kuang; Li, Chunjuan; Hu, Zhaorong; Zheng, Mei; Sun, Quanxi; Shan, Shihua	2020	Journal of fungi (Basel, Switzerland)	2309-608X 2309-608X	10.3390/jof6020052	We report here the AflR binding motif of Aspergillus flavus for the first time with the aid of ChIP-seq analysis. Of the 540 peak sequences associated with AflR binding events, 66.8% were located within 2 kb upstream (promoter region) of translational start sites. The identified 18-bp binding motif was a perfect palindromic sequence, 5'-CSSGGGWTCGAWCCCSSG'3' with S representing G or C and W repre…
133	Transcriptome analysis reveals an activation of major histocompatibility complex 1 and 2 pathways in chicken trachea immunized with infectious laryngotracheitis virus vaccine.	Luo, Juan; Carrillo, Jose A.; Menendez, Kimberly R.; Tablante, Nathaniel L.; Song, Jiuzhou	2014	Poultry science	0032-5791 0032-5791	10.3382/ps.2013-03624	Infectious laryngotracheitis is an acute, contagious, upper respiratory disease of chickens caused by gallid herpes virus 1. Due to mortality rates that can reach up to 70% depending on the virulence of the virus, the disease is of great economic importance to the poultry industry. In this study, 15-d-old specific pathogen-free White Leghorn chickens were used to perform transcriptome analysis of…
134	What Happens in a Moment.	Elliott, Mark A.; Giersch, Anne	2015	Frontiers in psychology	1664-1078 1664-1078	10.3389/fpsyg.2015.01905	There has been evidence for the very brief, temporal quantization of perceptual experience at regular intervals below 100 ms for several decades. We briefly describe how earlier studies led to the concept of "psychological moment" of between 50 and 60 ms duration. According to historical theories, within the psychological moment all events would be processed as co-temporal. More recently, a link …
135	The impact of allergic rhinitis and asthma on human nasal and bronchial epithelial gene expression.	Wagener, Ariane H.; Zwinderman, Aeilko H.; Luiten, Silvia; Fokkens, Wytske J.; Bel, Elisabeth H.; Sterk, Peter J.; van Drunen, Cornelis M.	2013	PloS one	1932-6203 1932-6203	10.1371/journal.pone.0080257	BACKGROUND: The link between upper and lower airways in patients with both asthma and allergic rhinitis is still poorly understood. As the biological complexity of these disorders can be captured by gene expression profiling we hypothesized that the clinical expression of rhinitis and/or asthma is related to differential gene expression between upper and lower airways epithelium. OBJECTIVE: Defin…
136	An ontology-based comparative anatomy information system.	Travillian, Ravensara S.; Diatchka, Kremena; Judge, Tejinder K.; Wilamowska, Katarzyna; Shapiro, Linda G.	2011	Artificial intelligence in medicine	1873-2860 0933-3657	10.1016/j.artmed.2010.10.001	INTRODUCTION: This paper describes the design, implementation, and potential use of a comparative anatomy information system (CAIS) for querying on similarities and differences between homologous anatomical structures across species, the knowledge base it operates upon, the method it uses for determining the answers to the queries, and the user interface it employs to present the results. The rel…
137	An integrative knowledge graph for rare diseases, derived from the Genetic and Rare Diseases Information Center (GARD).	Zhu, Qian; Nguyen, Dac-Trung; Grishagin, Ivan; Southall, Noel; Sid, Eric; Pariser, Anne	2020	Journal of biomedical semantics	2041-1480	10.1186/s13326-020-00232-y	BACKGROUND: The Genetic and Rare Diseases (GARD) Information Center was established by the National Institutes of Health (NIH) to provide freely accessible consumer health information on over 6500 genetic and rare diseases. As the cumulative scientific understanding and underlying evidence for these diseases have expanded over time, existing practices to generate knowledge from these publications…
138	HIVBrainSeqDB: a database of annotated HIV envelope sequences from brain and other anatomical sites.	Holman, Alexander G.; Mefford, Megan E.; O'Connor, Niall; Gabuzda, Dana	2010	AIDS research and therapy	1742-6405 1742-6405	10.1186/1742-6405-7-43	BACKGROUND: The population of HIV replicating within a host consists of independently evolving and interacting sub-populations that can be genetically distinct within anatomical compartments. HIV replicating within the brain causes neurocognitive disorders in up to 20-30% of infected individuals and is a viral sanctuary site for the development of drug resistance. The primary determinant of HIV n…
139	iTRAQ-Based Quantitative Proteomics Analysis of HeLa Cells Infected With Chlamydia muridarum TC0668 Mutant and Wild-Type Strains.	Wang, Yingzi; Arthur, Emmanuel Wirekoh; Liu, Na; Li, Xiaofang; Xiang, Wenjing; Maxwell, Asamoah; Li, Zhongyu; Zhou, Zhou	2019	Frontiers in microbiology	1664-302X 1664-302X	10.3389/fmicb.2019.02553	Chlamydia muridarum, an obligate intracellular pathogen, was used to establish a murine model of female upper genital tract infection by Chlamydia trachomatis. TC0668 in C. muridarum is a hypothetical chromosomal virulence protein that is involved in upper genital tract pathogenesis. The infection of mice with the C. muridarum TC0668-mutant (G216*) strain results in less pathological damage in th…
140	Preaxial polydactyly of the foot.	Burger, Elise B.; Baas, Martijn; Hovius, Steven E. R.; Hoogeboom, A. Jeannette M.; van Nieuwenhoven, Christianne A.	2018	Acta orthopaedica	1745-3682 1745-3674	10.1080/17453674.2017.1383097	Background and purpose - Preaxial polydactyly of the foot is a rare malformation and clinicians are often unfamiliar with the associated malformations and syndromes. In order to give guidelines for diagnostics and referral to a clinical geneticist, we provide an overview of the presentation using a literature review and our own patient population. Patients and methods - The literature review was …
141	Pulmonary microRNA profiling: implications in upper lobe predominant lung disease.	Armstrong, David A.; Nymon, Amanda B.; Ringelberg, Carol S.; Lesseur, Corina; Hazlett, Haley F.; Howard, Louisa; Marsit, Carmen J.; Ashare, Alix	2017	Clinical epigenetics	1868-7083 1868-7075	10.1186/s13148-017-0355-1	BACKGROUND: Numerous pulmonary diseases manifest with upper lobe predominance including cystic fibrosis, smoking-related chronic obstructive pulmonary disease, and tuberculosis. Zonal hypoxia, characteristic of these pulmonary maladies, and oxygen stress in general is known to exert profound effects on various important aspects of cell biology. Lung macrophages are major participants in the pulmo…
142	Differential microRNA expression in aristolochic acid-induced upper urothelial tract cancers ex vivo.	Tao, Le; Zeng, Yigang; Wang, Jun; Liu, Zhihong; Shen, Bing; Ge, Jifu; Liu, Yong; Guo, Yifeng; Qiu, Jianxin	2015	Molecular medicine reports	1791-3004 1791-2997	10.3892/mmr.2015.4330	Aristolochic acid (AA) is a carcinogenic, mutagenic and nephrotoxic compound commonly isolated from members of the plant family of Aristolochiaceae (such as Aristolochia and Asarum) and used in Chinese herbal medicine. Use of AA and AAcontaining plants causes chronic kidney disease (CKD) and upper urinary tract carcinoma (UUC); however, the underlying mechanism remains to be defined. miRNAs regul…
143	dsRNA-induced changes in gene expression profiles of primary nasal and bronchial epithelial cells from patients with asthma, rhinitis and controls.	Wagener, Ariane H.; Zwinderman, Aeilko H.; Luiten, Silvia; Fokkens, Wytske J.; Bel, Elisabeth H.; Sterk, Peter J.; van Drunen, Cornelis M.	2014	Respiratory research	1465-993X 1465-9921	10.1186/1465-9921-15-9	BACKGROUND: Rhinovirus infections are the most common cause of asthma exacerbations. The complex responses by airway epithelium to rhinovirus can be captured by gene expression profiling. We hypothesized that: a) upper and lower airway epithelium exhibit differential responses to double-stranded RNA (dsRNA), and b) that this is modulated by the presence of asthma and allergic rhinitis. OBJECTIVES…
144	The distinct effects of orally administered Lactobacillus rhamnosus GG and Lactococcus lactis subsp. lactis C59 on gene expression in the murine small intestine.	Suzuki, Chise; Aoki-Yoshida, Ayako; Aoki, Reiji; Sasaki, Keisuke; Takayama, Yoshiharu; Mizumachi, Koko	2017	PloS one	1932-6203 1932-6203	10.1371/journal.pone.0188985	The molecular mechanisms of strain-specific probiotic effects and the impact of the oral administration of probiotic strains on the host's gene expression are not yet well understood. The aim of this study was to investigate the strain-specific effects of probiotic strain intake on gene expression in the murine small intestine. Two distinct strains of lactic acid bacteria, Lactobacillus rhamnosus…
145	Comparative proteome analysis of the capsule from patients with frozen shoulder.	Hagiwara, Yoshihiro; Mori, Masaru; Kanazawa, Kenji; Ando, Akira; Yabe, Yutaka; Koide, Masashi; Sekiguchi, Takuya; Itaya, Nobuyuki; Tsuchiya, Masahiro; Itoi, Eiji	2018	Journal of shoulder and elbow surgery	1532-6500 1058-2746	10.1016/j.jse.2018.03.010	BACKGROUND: The etiology of frozen shoulder (FS) is unclear. Accordingly, this study used a label-free quantitative shotgun proteomic approach to elucidate the pathogenesis of FS based on protein expression levels. METHODS: Tissue samples from the rotator interval (RI), middle glenohumeral ligament (MGHL), and anterior-inferior glenohumeral ligament (IGHL) were collected from 12 FSs with severe s…
146	Identification of Associated Genes and Diseases in Patients With Congenital Upper-Limb Anomalies: A Novel Application of the OMT Classification.	Baas, Martijn; Stubbs, Andrew P.; van Zessen, David B.; Galjaard, Robert-Jan H.; van der Spek, Peter J.; Hovius, Steven E. R.; van Nieuwenhoven, Christianne A.	2017	The Journal of hand surgery	1531-6564 0363-5023	10.1016/j.jhsa.2017.03.043	PURPOSE: Congenital upper-limb anomalies (CULA) can present as a part of a syndrome or association. There is a wide spectrum of CULA, each of which might be related to different diseases. The structure provided by the Oberg, Manske, and Tonkin (OMT) classification could aid in differential diagnosis formulation in patients with CULA. The aims of this study were to review the Human Phenotype Ontol…
147	Identification of pathways and genes in the process of E6/E7-induced carcinogenesis of esophageal epithelial cells.	Xia, Yang; Li, Jintao; Li, Shuying; Khodahemmati, Sara; Ghaffar, Maliha; Chen, Su; Sheng, Wang	2020	Journal of medical virology	1096-9071 0146-6615	10.1002/jmv.25667	Human papillomavirus (HPV) infection was associated with some carcinomas, especially malignant tumors in upper digestive tract, upper respiratory tract, and genitourinary system. The mechanism of the viral transformation of normal cells is still not very clear. To investigate the tumorigenesis of epithelial cells, E6/E7-induced malignant transformation model cells were used for expression profili…
148	The genomic signature of human rhinoviruses A, B and C.	Megremis, Spyridon; Demetriou, Philippos; Makrinioti, Heidi; Manoussaki, Alkistis E.; Papadopoulos, Nikolaos G.	2012	PloS one	1932-6203 1932-6203	10.1371/journal.pone.0044557	Human rhinoviruses are single stranded positive sense RNA viruses that are presented in more than 50% of acute upper respiratory tract infections. Despite extensive studies on the genetic diversity of the virus, little is known about the forces driving it. In order to explain this diversity, many research groups have focused on protein sequence requirements for viable, functional and transmissibl…
149	Integrated pathway analysis of nasopharyngeal carcinoma implicates the axonemal dynein complex in the Malaysian cohort.	Chin, Yoon-Ming; Tan, Lu Ping; Abdul Aziz, Norazlin; Mushiroda, Taisei; Kubo, Michiaki; Mohd Kornain, Noor Kaslina; Tan, Geok Wee; Khoo, Alan Soo-Beng; Krishnan, Gopala; Pua, Kin-Choo; Yap, Yoke-Yeow; Teo, Soo-Hwang; Lim, Paul Vey-Hong; Nakamura, Yusuke; Lum, Chee Lun; Ng, Ching-Ching	2016	International journal of cancer	1097-0215 0020-7136	10.1002/ijc.30207	Nasopharyngeal carcinoma (NPC) is an epithelial squamous cell carcinoma on the mucosal lining of the nasopharynx. The etiology of NPC remains elusive despite many reported studies. Most studies employ a single platform approach, neglecting the cumulative influence of both the genome and transcriptome toward NPC development. We aim to employ an integrated pathway approach to identify dysregulated …
150	Real-Time Compliant Stream Processing Agents for Physical Rehabilitation.	Calvaresi, Davide; Calbimonte, Jean-Paul	2020	Sensors (Basel, Switzerland)	1424-8220 1424-8220	10.3390/s20030746	Digital rehabilitation is a novel concept that integrates state-of-the-art technologies for motion sensing and monitoring, with personalized patient-centric methodologies emerging from the field of physiotherapy. Thanks to the advances in wearable and portable sensing technologies, it is possible to provide patients with accurate monitoring devices, which simplifies the tracking of performance an…
151	Genomic analyses reveal evolutionary and geologic context for the plateau fungus Ophiocordyceps sinensis.	Liu, Jie; Guo, Linong; Li, Zongwei; Zhou, Zhe; Li, Zhen; Li, Qian; Bo, Xiaochen; Wang, Shengqi; Wang, Junli; Ma, Shuangcheng; Zheng, Jian; Yang, Ying	2020	Chinese medicine	1749-8546 1749-8546	10.1186/s13020-020-00365-3	Background: Ophiocordyceps sinensis, which is only naturally found in the high-elevation extreme environment of the Tibetan Plateau, has been used in traditional Chinese medicine. Information concerning the evolutionary and geologic context of O. sinensis remains limited, however. Methods: We constructed the high-quality genome of O. sinensis and provided insight into the evolution and ecology of…
152	A Knowledge-Based Machine Learning Approach to Gene Prioritisation in Amyotrophic Lateral Sclerosis.	Bean, Daniel M.; Al-Chalabi, Ammar; Dobson, Richard J. B.; Iacoangeli, Alfredo	2020	Genes	2073-4425 2073-4425	10.3390/genes11060668	Amyotrophic lateral sclerosis is a neurodegenerative disease of the upper and lower motor neurons resulting in death from neuromuscular respiratory failure, typically within two to five years of first symptoms. Several rare disruptive gene variants have been associated with ALS and are responsible for about 15% of all cases. Although our knowledge of the genetic landscape of this disease is impro…
153	Identification of a myometrial molecular profile for dystocic labor.	Brennan, Donal J.; McGee, Sharon F.; Rexhepaj, Elton; O'Connor, Darran P.; Robson, Michael; O'Herlihy, Colm	2011	BMC pregnancy and childbirth	1471-2393 1471-2393	10.1186/1471-2393-11-74	BACKGROUND: The most common indication for cesarean section (CS) in nulliparous women is dystocia secondary to ineffective myometrial contractility. The aim of this study was to identify a molecular profile in myometrium associated with dystocic labor. METHODS: Myometrial biopsies were obtained from the upper incisional margins of nulliparous women undergoing lower segment CS for dystocia (n = 4)…
154	Mechanism of Shuang Huang Lian oral liquid for Treatment of Mycoplasma Pneumonia in Children on Network Pharmacology.	Shi, Ling; Wu, Qi-Guo; Zhang, Ju-Cheng; Yang, Guang-Ming; Liu, Wei; Wang, Ze-Feng	2020	Combinatorial chemistry & high throughput screening	1875-5402 1386-2073	10.2174/1386207323666200514073428	BACKGROUND AND OBJECTIVE: Mycoplasmal pneumonia (MP) can lead to inflammation, multiple system immune damage, and mixed infection in children. The pathogenesis is still unclear. Shuang-Huang-Lian (SHL) oral liquid can treat acute upper respiratory tract infection, acute bronchitis and light pneumonia. However, our current understanding of the molecular mechanisms supporting its clinical applicati…
155	Gene expression profiling in the Cynomolgus macaque Macaca fascicularis shows variation within the normal birth range.	Emerald, Bright Starling; Chng, Keefe; Masuda, Shinya; Sloboda, Deborah M.; Vickers, Mark H.; Kambadur, Ravi; Gluckman, Peter D.	2011	BMC genomics	1471-2164 1471-2164	10.1186/1471-2164-12-509	BACKGROUND: Although an adverse early-life environment has been linked to an increased risk of developing the metabolic syndrome, the molecular mechanisms underlying altered disease susceptibility as well as their relevance to humans are largely unknown. Importantly, emerging evidence suggests that these effects operate within the normal range of birth weights and involve mechanisms of developmen…
156	Transcriptome analysis of chicken kidney tissues following coronavirus avian infectious bronchitis virus infection.	Cong, Feng; Liu, Xiaoli; Han, Zongxi; Shao, Yuhao; Kong, Xiangang; Liu, Shengwang	2013	BMC genomics	1471-2164 1471-2164	10.1186/1471-2164-14-743	BACKGROUND: Infectious bronchitis virus (IBV), a prototype of the Coronaviridae family, is an economically important causative agent of infectious bronchitis in chickens and causes an acute and highly contagious upper respiratory tract infections that may lead to nephritis. However, the molecular antiviral mechanisms of chickens to IBV infection remain poorly understood. In this study, we conduct…
157	Balanced Genome Triplication in Wheat Causes Premature Growth Arrest and an Upheaval of Genome-Wide Gene Regulation.	Gou, Xiaowan; Lv, Ruili; Wang, Changyi; Fu, Tiansi; Sha, Yan; Gong, Lei; Zhang, Huakun; Liu, Bao	2020	Frontiers in genetics	1664-8021 1664-8021	10.3389/fgene.2020.00687	Polyploidy, or whole genome duplication (WGD), is a driving evolutionary force across the tree of life and has played a pervasive role in the evolution of the plant kingdom. It is generally believed that a major genetic attribute contributing to the success of polyploidy is increased gene and genome dosage. The evolution of polyploid wheat has lent support to this scenario. Wheat has evolved at t…
158	Machine learning for discovering missing or wrong protein function annotations : A comparison using updated benchmark datasets.	Nakano, Felipe Kenji; Lietaert, Mathias; Vens, Celine	2019	BMC bioinformatics	1471-2105 1471-2105	10.1186/s12859-019-3060-6	BACKGROUND: A massive amount of proteomic data is generated on a daily basis, nonetheless annotating all sequences is costly and often unfeasible. As a countermeasure, machine learning methods have been used to automatically annotate new protein functions. More specifically, many studies have investigated hierarchical multi-label classification (HMC) methods to predict annotations, using the Func…
159	An equivalence approach to the integrative analysis of feature lists.	Sanchez-Pla, Alex; Salicru, Miquel; Ocana, Jordi	2019	BMC bioinformatics	1471-2105 1471-2105	10.1186/s12859-019-3008-x	BACKGROUND: Although a few comparison methods based on the biological meaning of gene lists have been developed, the goProfiles approach is one of the few that are being used for that purpose. It consists of projecting lists of genes into predefined levels of the Gene Ontology, in such a way that a multinomial model can be used for estimation and testing. Of particular interest is the fact that i…
160	Assessing the patterns of linkage disequilibrium in genic regions of the human genome.	Sun, Peng; Zhang, Ruijie; Jiang, Yongshuai; Wang, Xing; Li, Jin; Lv, Hongchao; Tang, Guoping; Guo, Xiaodan; Meng, Xianwen; Zhang, Haikun; Zhang, Ruimin	2011	The FEBS journal	1742-4658 1742-464X	10.1111/j.1742-4658.2011.08293.x	We used the genotyping data generated by the International HapMap Project to study the patterns of linkage disequilibrium (LD) in human genic regions. LD patterns for 11,998 genes from 11 HapMap populations were identified by analyzing the distribution of haplotype blocks. The genes were prioritized using LD levels. The results showed that there were significant differences in the degree of LD be…
161	City block distance and rough-fuzzy clustering for identification of co-expressed microRNAs.	Paul, Sushmita; Maji, Pradipta	2014	Molecular bioSystems	1742-2051 1742-2051	10.1039/c4mb00101j	The microRNAs or miRNAs are short, endogenous RNAs having ability to regulate mRNA expression at the post-transcriptional level. Various studies have revealed that miRNAs tend to cluster on chromosomes. The members of a cluster that are in close proximity on chromosomes are highly likely to be processed as co-transcribed units. Therefore, a large proportion of miRNAs are co-expressed. Expression …
162	Decreased Levels of Foldase and Chaperone Proteins Are Associated with an Early-Onset Amyotrophic Lateral Sclerosis.	Filareti, Melania; Luotti, Silvia; Pasetto, Laura; Pignataro, Mauro; Paolella, Katia; Messina, Paolo; Pupillo, Elisabetta; Filosto, Massimiliano; Lunetta, Christian; Mandrioli, Jessica; Fuda, Giuseppe; Calvo, Andrea; Chio, Adriano; Corbo, Massimo; Bendotti, Caterina; Beghi, Ettore; Bonetto, Valentina	2017	Frontiers in molecular neuroscience	1662-5099 1662-5099	10.3389/fnmol.2017.00099	Amyotrophic lateral sclerosis (ALS) is a fatal neurodegenerative disease characterized by a progressive upper and lower motor neuron degeneration. One of the peculiar clinical characteristics of ALS is the wide distribution in age of onset, which is probably caused by different combinations of intrinsic and exogenous factors. We investigated whether these modifying factors are converging into com…
163	Proteomic Evaluation of the Acute Radiation Syndrome of the Gastrointestinal Tract in a Murine Total-body Irradiation Model.	Huang, Weiliang; Yu, Jianshi; Jones, Jace W.; Carter, Claire L.; Pierzchalski, Keely; Tudor, Gregory; Booth, Catherine; MacVittie, Thomas J.; Kane, Maureen A.	2019	Health physics	1538-5159 0017-9078	10.1097/HP.0000000000000951	Radiation exposure to the gastrointestinal system contributes to the acute radiation syndrome in a dose- and time-dependent manner. Molecular mechanisms that lead to the gastrointestinal acute radiation syndrome remain incompletely understood. Using a murine model of total-body irradiation, C57BL/6J male mice were irradiated at 8, 10, 12, and 14 Gy and assayed at day 1, 3, and 6 after exposure an…
164	Whole genome expression profiling of gastric high-grade intraepithelial neoplasia with or without cancer.	Zu, Ming; Xu, Xue; Zhou, Wei-xun; Fei, Gui-jun; Wu, Xi; Yao, Fang; Li, Yuan; Cheng, Shu-jun; Lu, Xing-hua	2015	Zhongguo yi xue ke xue yuan xue bao. Acta Academiae Medicinae Sinicae	1000-503X 1000-503X	10.3881/j.issn.1000-503X.2015.01.005	OBJECTIVE: To investigate the whole genome expression profiles between gastric high-grade intraepithelial neoplasia (HGIN) tissues with cancer and HGIN tissues without cancer. METHODS: Gastric specimens from an upper magnifying chromoendoscopic targeted biopsy were collected at Peking Union Medical College Hospital from March 2010 to May 2013. Each of the forceps biopsies from the 21 patients was…
165	Gene expression of sternohyoid and diaphragm muscles in type 2 diabetic rats.	van Lunteren, Erik; Moyer, Michelle	2013	BMC endocrine disorders	1472-6823 1472-6823	10.1186/1472-6823-13-43	BACKGROUND: Type 2 diabetes differs from type 1 diabetes in its pathogenesis. Type 1 diabetic diaphragm has altered gene expression which includes lipid and carbohydrate metabolism, ubiquitination and oxidoreductase activity. The objectives of the present study were to assess respiratory muscle gene expression changes in type 2 diabetes and to determine whether they are greater for the diaphragm …
166	De novo transcriptome sequencing of the snail Echinolittorina malaccana: identification of genes responsive to thermal stress and development of genetic markers for population studies.	Wang, Wei; Hui, Jerome H. L.; Chan, Ting Fung; Chu, Ka Hou	2014	Marine biotechnology (New York, N.Y.)	1436-2236 1436-2228	10.1007/s10126-014-9573-0	Echinolittorina snails inhabit the upper intertidal rocky shore and face strong selection pressures from thermal extremes and fluctuations. Revealing the molecular processes of adaptive significance is greatly obstructed by the scarcity of genomic resource for these taxa. Here, we reported the first comprehensive transcriptome dataset for the genus Echinolittorina. Using Illumina HiSeq 2000 platf…
167	Excess Dietary Zinc Intake in Neonatal Mice Causes Oxidative Stress and Alters Intestinal Host-Microbe Interactions.	Podany, Abigail; Rauchut, Jessica; Wu, Tong; Kawasawa, Yuka Imamura; Wright, Justin; Lamendella, Regina; Soybel, David I.; Kelleher, Shannon L.	2019	Molecular nutrition & food research	1613-4133 1613-4125	10.1002/mnfr.201800947	SCOPE: Greater than 68% of young infants are exposed to dietary zinc (Zn) levels that are higher than the Tolerable Upper Intake Limit. However, the consequences of excess dietary Zn during early life on intestinal function and host-microbe interactions are unknown. METHODS AND RESULTS: Neonatal mice are gavaged with 100 Zn microg d(-1) from postnatal day (PN) 2 through PN10 and indices of intest…
168	The administration of intranasal live attenuated influenza vaccine induces changes in the nasal microbiota and nasal epithelium gene expression profiles.	Tarabichi, Y.; Li, K.; Hu, S.; Nguyen, C.; Wang, X.; Elashoff, D.; Saira, K.; Frank, Bryan; Bihan, Monika; Ghedin, E.; Methe, Barbara A.; Deng, Jane C.	2015	Microbiome	2049-2618 2049-2618	10.1186/s40168-015-0133-2	BACKGROUND: Viral infections such as influenza have been shown to predispose hosts to increased colonization of the respiratory tract by pathogenic bacteria and secondary bacterial pneumonia. To examine how viral infections and host antiviral immune responses alter the upper respiratory microbiota, we analyzed nasal bacterial composition by 16S ribosomal RNA (rRNA) gene sequencing in healthy adul…
169	Suppression of skeletal muscle turnover in cancer cachexia: evidence from the transcriptome in sequential human muscle biopsies.	Gallagher, Iain J.; Stephens, Nathan A.; MacDonald, Alisdair J.; Skipworth, Richard J. E.; Husi, Holger; Greig, Carolyn A.; Ross, James A.; Timmons, James A.; Fearon, Kenneth C. H.	2012	Clinical cancer research : an official journal of the American Association for Cancer Research	1078-0432 1078-0432	10.1158/1078-0432.CCR-11-2133	PURPOSE: The mechanisms underlying muscle wasting in patients with cancer remain poorly understood, and consequently there remains an unmet clinical need for new biomarkers and treatment strategies. EXPERIMENTAL DESIGN: Microarrays were used to examine the transcriptome in single biopsies from healthy controls (n = 6) and in paired biopsies [pre-resection baseline (weight-loss 7%) and 8 month pos…
170	Identify differential gene expressions in fatty infiltration process in rotator cuff.	Hu, Pengfei; Jiang, Lifeng; Wu, Lidong	2019	Journal of orthopaedic surgery and research	1749-799X 1749-799X	10.1186/s13018-019-1182-1	BACKGROUND: Rotator cuff tears are one of the most frequent upper extremity injuries and lead to pain and disability. Recent studies have implicated fatty infiltration in rotator cuff is a key failure element with the higher re-tear rates and poorer functional prognosis. Therefore, we investigated the differential expression of key genes in each stage of rotator cuff tear. METHODS: A published ex…
171	Standard Anatomic Terminologies: Comparison for Use in a Health Information Exchange-Based Prior Computed Tomography (CT) Alerting System.	Beitia, Anton Oscar; Lowry, Tina; Vreeman, Daniel J.; Loo, George T.; Delman, Bradley N.; Thum, Frederick L.; Slovis, Benjamin H.; Shapiro, Jason S.	2017	JMIR medical informatics	2291-9694	10.2196/medinform.8765	BACKGROUND: A health information exchange (HIE)-based prior computed tomography (CT) alerting system may reduce avoidable CT imaging by notifying ordering clinicians of prior relevant studies when a study is ordered. For maximal effectiveness, a system would alert not only for prior same CTs (exams mapped to the same code from an exam name terminology) but also for similar CTs (exams mapped to di…
172	CK14 Expression Identifies a Basal/Squamous-Like Type of Papillary Non-Muscle-Invasive Upper Tract Urothelial Carcinoma.	Jung, Minsun; Jang, Insoon; Kim, Kwangsoo; Moon, Kyung Chul	2020	Frontiers in oncology	2234-943X 2234-943X	10.3389/fonc.2020.00623	Object: CK14 expression is an important marker of basal/squamous-like (BASQ)-type muscle-invasive bladder carcinoma, and this molecularly defined subtype has a poor prognosis and a distinct response to chemotherapy. However, CK14 expression and its clinicopathological and molecular significance in papillary non-muscle-invasive upper tract urothelial carcinoma (NMIUTUC) remain unknown. Herein, we …
173	Differential gene expression profiling of gastric intraepithelial neoplasia and early-stage adenocarcinoma.	Xu, Xue; Feng, Lin; Liu, Yu; Zhou, Wei-Xun; Ma, Ying-Cai; Fei, Gui-Jun; An, Ning; Li, Yuan; Wu, Xi; Yao, Fang; Cheng, Shu-Jun; Lu, Xing-Hua	2014	World journal of gastroenterology	2219-2840 1007-9327	10.3748/wjg.v20.i47.17883	AIM: To investigate the differentiated whole genome expression profiling of gastric high- and low-grade intraepithelial neoplasia and early-stage adenocarcinoma. METHODS: Gastric specimens from an upper magnifying chromoendoscopic targeted biopsy were collected from March 2010 to May 2013. Whole genome expression profiling was performed on 19 low-grade intraepithelial neoplasia (LGIN), 20 high-gr…
174	Gene expression underlying enhanced, steroid-dependent auditory sensitivity of hair cell epithelium in a vocal fish.	Fergus, Daniel J.; Feng, Ni Y.; Bass, Andrew H.	2015	BMC genomics	1471-2164 1471-2164	10.1186/s12864-015-1940-3	BACKGROUND: Successful animal communication depends on a receiver's ability to detect a sender's signal. Exemplars of adaptive sender-receiver coupling include acoustic communication, often important in the context of seasonal reproduction. During the reproductive summer season, both male and female midshipman fish (Porichthys notatus) exhibit similar increases in the steroid-dependent frequency …
175	RNA sequencing-based analysis of the spleen transcriptome following infectious bronchitis virus infection of chickens selected for different mannose-binding lectin serum concentrations.	Hamzic, Edin; Kjaerup, Rikke Brodsgaard; Mach, Nuria; Minozzi, Guilietta; Strozzi, Francesco; Gualdi, Valentina; Williams, John L.; Chen, Jun; Wattrang, Eva; Buitenhuis, Bart; Juul-Madsen, Helle Risdahl; Dalgaard, Tina Sorensen	2016	BMC genomics	1471-2164 1471-2164	10.1186/s12864-016-2403-1	BACKGROUND: Avian infectious bronchitis is a highly contagious disease of the upper-respiratory tract caused by infectious bronchitis virus (IBV). Understanding the molecular mechanisms involved in the interaction between innate and adaptive immune responses to IBV infection is a crucial element for further improvements in strategies to control IB. To this end, two chicken lines, selected for hig…
176	Comprehensive discovery of subsample gene expression components by information explanation: therapeutic implications in cancer.	Pepke, Shirley; Ver Steeg, Greg	2017	BMC medical genomics	1755-8794 1755-8794	10.1186/s12920-017-0245-6	BACKGROUND: De novo inference of clinically relevant gene function relationships from tumor RNA-seq remains a challenging task. Current methods typically either partition patient samples into a few subtypes or rely upon analysis of pairwise gene correlations that will miss some groups in noisy data. Leveraging higher dimensional information can be expected to increase the power to discern targeta…
182	Restructuring the foundational model of anatomy.	Héja, Gergely; Varga, Péter; Pallinger, Péter; Surján, György	2006	Studies in health technology and informatics	0926-9630 0926-9630		The authors present a method to convert the FMA to a description logic-based representation in OWL. The concepts denoting anatomical structures are aligned to the DOLCE formal top-level ontology, and converted to a compact core ontology in the spirit of GALEN. The paper presents the identified problems in the FMA and the main aspects of the re-modelling.
190	Deep Learning Meets Biomedical Ontologies: Knowledge Embeddings for Epilepsy.	Maldonado, Ramon; Goodwin, Travis R.; Skinner, Michael A.; Harabagiu, Sanda M.	2017	AMIA ... Annual Symposium proceedings. AMIA Symposium	1942-597X 1559-4076		While biomedical ontologies have traditionally been used to guide the identification of concepts or relations in biomedical data, recent advances in deep learning are able to capture high-quality knowledge from textual data and represent it in graphical structures. As opposed to the top-down methodology used in the generation of ontologies, which starts with the principled design of the upper ont…
191	An upper-level ontology for the biomedical domain.	McCray, Alexa T.	2003	Comparative and functional genomics	1531-6912 1532-6268 1531-6912	10.1002/cfg.255	At the US National Library of Medicine we have developed the Unified Medical Language System (UMLS), whose goal it is to provide integrated access to a large number of biomedical resources by unifying the vocabularies that are used to access those resources. The UMLS currently interrelates some 60 controlled vocabularies in the biomedical domain. The UMLS coverage is quite extensive, including no…
192	Towards an upper level ontology for molecular biology.	Schulz, Stefan; Beisswanger, Elena; Wermter, Joachim; Hahn, Udo	2006	AMIA ... Annual Symposium proceedings. AMIA Symposium	1942-597X 1559-4076		There is a growing need for the general-purpose description of the basic conceptual entities in the life sciences. Up until now, upper level models have mainly been purpose-driven, such as the GENIA ontology, originally devised as a vocabulary for corpus annotation. As an alternative,we here present BioTop, a description-logic-based top level ontology for molecular biology, which we consider as a…
194	Ontology for Semantic Data Integration in the Domain of IT Benchmarking.	Pfaff, Matthias; Neubig, Stefan; Krcmar, Helmut	2018	Journal on data semantics	1861-2032 1861-2040	10.1007/s13740-017-0084-9	A domain-specific ontology for IT benchmarking has been developed to bridge the gap between a systematic characterization of IT services and their data-based valuation. Since information is generally collected during a benchmark exercise using questionnaires on a broad range of topics, such as employee costs, software licensing costs, and quantities of hardware, it is commonly stored as natural l…
199	A top-level ontology of functions and its application in the Open Biomedical Ontologies.	Burek, Patryk; Hoehndorf, Robert; Loebe, Frank; Visagie, Johann; Herre, Heinrich; Kelso, Janet	2006	Bioinformatics (Oxford, England)	1367-4811 1367-4803	10.1093/bioinformatics/btl266	MOTIVATION: A clear understanding of functions in biology is a key component in accurate modelling of molecular, cellular and organismal biology. Using the existing biomedical ontologies it has been impossible to capture the complexity of the community's knowledge about biological functions. RESULTS: We present here a top-level ontological framework for representing knowledge about biological fun…
201	The African wildlife ontology tutorial ontologies.	Keet, C. Maria	2020	Journal of biomedical semantics	2041-1480	10.1186/s13326-020-00224-y	BACKGROUND: Most tutorial ontologies focus on illustrating one aspect of ontology development, notably language features and automated reasoners, but ignore ontology development factors, such as emergent modelling guidelines and ontological principles. Yet, novices replicate examples from the exercise they carry out. Not providing good examples holistically causes the propagation of sub-optimal o…
207	Applying a biomedical top-level ontology to encode biological taxa.	Boeker, Martin; Stenzhorn, Holger; Schulz, Stefan	2008	AMIA ... Annual Symposium proceedings. AMIA Symposium	1942-597X 1559-4076		Classifying biological entities in terms of species and taxa is an important endeavor in biology. But even though many statements within current biomedical ontologies are indeed taxon-dependent, no standard way exists to properly introduce taxon or species information into current ontological architectures. Therefore we discuss various practices to represent such information by applying a biomedi…
213	The RIKEN integrated database of mammals.	Masuya, Hiroshi; Makita, Yuko; Kobayashi, Norio; Nishikata, Koro; Yoshida, Yuko; Mochizuki, Yoshiki; Doi, Koji; Takatsuki, Terue; Waki, Kazunori; Tanaka, Nobuhiko; Ishii, Manabu; Matsushima, Akihiro; Takahashi, Satoshi; Hijikata, Atsushi; Kozaki, Kouji; Furuichi, Teiichi; Kawaji, Hideya; Wakana, Shigeharu; Nakamura, Yukio; Yoshiki, Atsushi; Murata, Takehide; Fukami-Kobayashi, Kaoru; Mohan, Sujath…	2011	Nucleic acids research	1362-4962 0305-1048 0305-1048	10.1093/nar/gkq1078	The RIKEN integrated database of mammals (http://scinets.org/db/mammal) is the official undertaking to integrate its mammalian databases produced from multiple large-scale programs that have been promoted by the institute. The database integrates not only RIKEN's original databases, such as FANTOM, the ENU mutagenesis program, the RIKEN Cerebellar Development Transcriptome Database and the Biores…
215	Traumatic brain injury rehabilitation: analysis of common data elements.	Grove, Michael J.; Lamberty, Greg J.; Gatewood, Lael C.; Johnson, Layne M.	2013	Studies in health technology and informatics	1879-8365 0926-9630		Physical medicine rehabilitation interventions for post-acute traumatic brain injury (TBI) are heterogeneous and subject to differences based on multi-disciplinary treatment plans [1]. There is no universal knowledge representation (KR) model for TBI rehabilitation which impedes data collection, aggregation, computation, and sharing. This paper describes results of an analysis of the National Ins…
216	Ontology-based approach for managing personal health and wellness information.	Sachinopoulou, Anna; Leppänen, Juha; Kaijanranta, Hannu; Lähteenmäki, Jaakko	2007	Annual International Conference of the IEEE Engineering in Medicine and Biology Society. IEEE Engineering in Medicine and Biology Society. Annual International Conference	2375-7477 2375-7477	10.1109/IEMBS.2007.4352662	This paper describes a new approach for collecting and sharing personal health and wellness information. The approach is based on a Personal Health Record (PHR) including both clinical and non-clinical data. The PHR is located on a network server referred as Common Server. The overall service architecture for providing anonymous and private access to the PHR is described. Semantic interoperabilit…
218	Fast, cheap and out of control: a zero curation model for ontology development.	Good, Benjamin M.; Tranfield, Erin M.; Tan, Poh C.; Shehata, Marlene; Singhera, Gurpreet K.; Gosselink, John; Okon, Elena B.; Wilkinson, Mark D.	2006	Pacific Symposium on Biocomputing. Pacific Symposium on Biocomputing	2335-6928 2335-6928		During two days at a conference focused on circulatory and respiratory health, 68 volunteers untrained in knowledge engineering participated in an experimental knowledge capture exercise. These volunteers created a shared vocabulary of 661 terms, linking these terms to each other and to a pre-existing upper ontology by adding 245 hyponym relationships and 340 synonym relationships. While ontology…
220	Alignment of the UMLS semantic network with BioTop: methodology and assessment.	Schulz, Stefan; Beisswanger, Elena; van den Hoek, László; Bodenreider, Olivier; van Mulligen, Erik M.	2009	Bioinformatics (Oxford, England)	1367-4811 1367-4803 1367-4803	10.1093/bioinformatics/btp194	MOTIVATION: For many years, the Unified Medical Language System (UMLS) semantic network (SN) has been used as an upper-level semantic framework for the categorization of terms from terminological resources in biomedicine. BioTop has recently been developed as an upper-level ontology for the biomedical domain. In contrast to the SN, it is founded upon strict ontological principles, using OWL DL as…
221	Coping with medical polysemy in the semantic web: the role of ontologies.	Pisanelli, Domenico M.; Gangemi, Aldo; Battaglia, Massimo; Catenacci, Carola	2004	Studies in health technology and informatics	0926-9630 0926-9630		Polysemy is the linguistic phenomenon by which a term has more than one meaning. It is not a negligible issue in information management, since an effective and unambiguous sharing of the semantic content of data among different databases or knowledge repositories is needed. The paper illustrates a case of polysemy (concerning inflammation), and puts it within the framework provided by the DOLCE+ …
222	Spatio-structural granularity of biological material entities.	Vogt, Lars	2010	BMC bioinformatics	1471-2105 1471-2105	10.1186/1471-2105-11-289	BACKGROUND: With the continuously increasing demands on knowledge- and data-management that databases have to meet, ontologies and the theories of granularity they use become more and more important. Unfortunately, currently used theories and schemes of granularity unnecessarily limit the performance of ontologies due to two shortcomings: (i) they do not allow the integration of multiple granular…
223	The ontology of biological taxa.	Schulz, Stefan; Stenzhorn, Holger; Boeker, Martin	2008	Bioinformatics (Oxford, England)	1367-4811 1367-4803 1367-4803	10.1093/bioinformatics/btn158	MOTIVATION: The classification of biological entities in terms of species and taxa is an important endeavor in biology. Although a large amount of statements encoded in current biomedical ontologies is taxon-dependent there is no obvious or standard way for introducing taxon information into an integrative ontology architecture, supposedly because of ongoing controversies about the ontological na…
224	OntoVIP: an ontology for the annotation of object models used for medical image simulation.	Gibaud, Bernard; Forestier, Germain; Benoit-Cattin, Hugues; Cervenansky, Frédéric; Clarysse, Patrick; Friboulet, Denis; Gaignard, Alban; Hugonnard, Patrick; Lartizien, Carole; Liebgott, Hervé; Montagnat, Johan; Tabary, Joachim; Glatard, Tristan	2014	Journal of biomedical informatics	1532-0480 1532-0464 1532-0464	10.1016/j.jbi.2014.07.008	This paper describes the creation of a comprehensive conceptualization of object models used in medical image simulation, suitable for major imaging modalities and simulators. The goal is to create an application ontology that can be used to annotate the models in a repository integrated in the Virtual Imaging Platform (VIP), to facilitate their sharing and reuse. Annotations make the anatomical,…
225	Granularity issues in the alignment of upper ontologies.	Schulz, Stefan; Boeker, Martin; Stenzhorn, Holger; Niggemann, Jörg	2009	Methods of information in medicine	0026-1270 0026-1270	10.3414/ME9221	OBJECTIVES: The application of upper ontologies has been repeatedly advocated for to support the interoperability between different domain ontologies for facilitating the shared use of data within and across disciplines. BioTop is an upper domain ontology that aims at aligning more specialized biomolecular and biomedical ontologies. The integration of BioTop and the upper ontology Basic Formal On…
226	ONTODerm--a domain ontology for dermatology.	Eapen, Bell Raj	2008	Dermatology online journal	1087-2108 1087-2108		A specialty specific ontology for dermatology can be a very useful tool for conveying an accurate meaning to collaborative guideline applications and software systems. This paper describes the basics of ontology and the need for ontology in dermatology. We also propose the basic structure for one such ontology called ONTODerm. ONTODerm is grounded on DOLCE Lite foundational ontology and its purpo…
227	Towards an ontology for sharing medical images and regions of interest in neuroimaging.	Temal, Lynda; Dojat, Michel; Kassel, Gilles; Gibaud, Bernard	2008	Journal of biomedical informatics	1532-0480 1532-0464	10.1016/j.jbi.2008.03.002	The goal of the NeuroBase project is to facilitate collaborative research in neuroimaging through a federated system based on semantic web technologies. The cornerstone and focus of this paper is the design of a common semantic model providing a unified view on all data and tools to be shared. For this purpose, we built a multi-layered and multi-components formal ontology. This paper presents two…
229	Fiat or bona fide boundary--a matter of granular perspective.	Vogt, Lars; Grobe, Peter; Quast, Björn; Bartolomaeus, Thomas	2012	PloS one	1932-6203 1932-6203	10.1371/journal.pone.0048603	BACKGROUND: Distinguishing bona fide (i.e. natural) and fiat (i.e. artificial) physical boundaries plays a key role for distinguishing natural from artificial material entities and is thus relevant to any scientific formal foundational top-level ontology, as for instance the Basic Formal Ontology (BFO). In BFO, the distinction is essential for demarcating two foundational categories of material e…
231	The @neurIST ontology of intracranial aneurysms: providing terminological services for an integrated IT infrastructure.	Boeker, Martin; Stenzhorn, Holger; Kumpf, Kai; Bijlenga, Philippe; Schulz, Stefan; Hanser, Susanne	2007	AMIA ... Annual Symposium proceedings. AMIA Symposium	1942-597X 1559-4076		The @neurIST ontology is currently under development within the scope of the European project @neurIST intended to serve as a module in a complex architecture aiming at providing a better understanding and management of intracranial aneurysms and subarachnoid hemorrhages. Due to the integrative structure of the project the ontology needs to represent entities from various disciplines on a large s…
232	Evaluation of a UMLS Auditing Process of Semantic Type Assignments.	Gu, Huanying Helen; Hripcsak, George; Chen, Yan; Morrey, C. Paul; Elhanan, Gai; Cimino, James; Geller, James; Perl, Yehoshua	2007	AMIA ... Annual Symposium proceedings. AMIA Symposium	1942-597X 1559-4076		The UMLS is a terminological system that integrates many source terminologies. Each concept in the UMLS is assigned one or more semantic types from the Semantic Network, an upper level ontology for biomedicine. Due to the complexity of the UMLS, errors exist in the semantic type assignments. Finding assignment errors may unearth modeling errors. Even with sophisticated tools, discovering assignme…
235	Ontological interpretation of biomedical database content.	Santana da Silva, Filipe; Jansen, Ludger; Freitas, Fred; Schulz, Stefan	2017	Journal of biomedical semantics	2041-1480	10.1186/s13326-017-0127-z	BACKGROUND: Biological databases store data about laboratory experiments, together with semantic annotations, in order to support data aggregation and retrieval. The exact meaning of such annotations in the context of a database record is often ambiguous. We address this problem by grounding implicit and explicit database content in a formal-ontological framework. METHODS: By using a typical extr…
237	Inflammation ontology design pattern: an exercise in building a core biomedical ontology with descriptions and situations.	Gangemi, Aldo; Catenacci, Carola; Battaglia, Massimo	2004	Studies in health technology and informatics	0926-9630 0926-9630		Formal ontology has proved to be an extremely useful tool for negotiating intended meaning, for building explicit, formal data sheets, and for the discovery of novel views on existing data structures. This paper describes an example of application of formal ontological methods to the creation of biomedical ontologies. Addressed here is the ambiguous notion of inflammation, which spans across mult…
238	Application of Ontology Technology in Health Statistic Data Analysis.	Guo, Minjiang; Hu, Hongpu; Lei, Xingyun	2017	Studies in health technology and informatics	1879-8365 0926-9630		Research Purpose: establish health management ontology for analysis of health statistic data. Proposed Methods: this paper established health management ontology based on the analysis of the concepts in China Health Statistics Yearbook, and used protégé to define the syntactic and semantic structure of health statistical data. RESULTS: six classes of top-level ontology concepts and their subclass…
239	HL7 FHIR: Ontological Reinterpretation of Medication Resources.	Martinez-Costa, Catalina; Schulz, Stefan	2017	Studies in health technology and informatics	1879-8365 0926-9630		"A solid ontology-based analysis with a rigorous formal mapping for correctness" is one of the ten reasons why the HL7 standard Fast Healthcare Interoperability Resources (FHIR) is advertised to be better than other standards for EHR interoperability. In this paper, we aim at contributing to this formal analysis by proposing an RDF representation of a subset of FHIR resources based on a highly co…
240	CLASSIFYING PROCESSES: AN ESSAY IN APPLIED ONTOLOGY.	Smith, Barry	2012	Ratio	0034-0006 1467-9329 0034-0006	10.1111/j.1467-9329.2012.00557.x	We begin by describing recent developments in the burgeoning discipline of applied ontology, focusing especially on the ways ontologies are providing a means for the consistent representation of scientific data. We then introduce Basic Formal Ontology (BFO), a top-level ontology that is serving as domain-neutral framework for the development of lower level ontologies in many specialist discipline…
242	Modeling patient safety incidents knowledge with the Categorial Structure method.	Souvignet, Julien; Bousquet, Cédric; Lewalle, Pierre; Trombert-Paviot, Béatrice; Rodrigues, Jean Marie	2011	AMIA ... Annual Symposium proceedings. AMIA Symposium	1942-597X 1559-4076		Following the WHO initiative named World Alliance for Patient Safety (PS) launched in 2004 a conceptual framework developed by PS national reporting experts has summarized the knowledge available. As a second step, the Department of Public Health of the University of Saint Etienne team elaborated a Categorial Structure (a semi formal structure not related to an upper level ontology) identifying t…
243	Standardized terminology for clinical trial protocols based on top-level ontological categories.	Heller, B.; Herre, H.; Lippoldt, K.; Loeffler, M.	2004	Studies in health technology and informatics	0926-9630 0926-9630		This paper describes a new method for the ontologically based standardization of concepts with regard to the quality assurance of clinical trial protocols. We developed a data dictionary for medical and trial-specific terms in which concepts and relations are defined context-dependently. The data dictionary is provided to different medical research networks by means of the software tool Onto-Buil…
244	Ontological analysis of SNOMED CT.	Héja, Gergely; Surján, György; Varga, Péter	2008	BMC medical informatics and decision making	1472-6947 1472-6947	10.1186/1472-6947-8-S1-S8	BACKGROUND: SNOMED CT is the most comprehensive medical terminology. However, its use for intelligent services based on formal reasoning is questionable. METHODS: The analysis of the structure of SNOMED CT is based on the formal top-level ontology DOLCE. RESULTS: The analysis revealed several ontological and knowledge-engineering errors, the most important are errors in the hierarchy (mostly from…
246	A multi-layered application for the gross description using Semantic Web technology.	Kim, Hong-Gee; Ha, Byung-Hyun; Lee, Jae-Il; Kim, Myeng-Ki	2005	International journal of medical informatics	1386-5056 1386-5056	10.1016/j.ijmedinf.2004.10.002	OBJECTIVE: Development of a Semantic Web technology based system for the formalization of the gross description. METHOD: A system is developed using the Java-2 platform. It is based on a light-weight version of the Galen top level ontology. Web technologies like XML, SAX en DOM have been used. RESULT: Three system components have been developed to support the semantic, the object and the syntax l…
247	SNOMED CT's problem list: ontologists' and logicians' therapy suggestions.	Schulz, Stefan; Suntisrivaraporn, Boontawee; Baader, Franz	2007	Studies in health technology and informatics	0926-9630 0926-9630		After a critical review of the present architecture of SNOMED CT, addressing both logical and ontological issues, we present a roadmap towards an overall improvement of this terminology. In particular, we recommend the following actions: Upper level categories should be rearranged according to a standard upper level ontology. Meta-class like concepts should be identified and removed from the taxo…
249	Design principles of DOLCE-based formal representation of ICD10.	Héja, Gergely; Varga, Péter; Surján, György	2008	Studies in health technology and informatics	0926-9630 0926-9630		The authors present the framework of formal representation of ICD10 based on DOLCE. The goal of the work is to represent the meaning of the categories of the classification systems based on a formal top-level ontology. The ICD categories are described in the space of atomic disease concepts, while the diseases themselves are defined on a pathological basis. The anatomical entities are taken from …
250	Knowledge model for emergency response based on contingency planning system of China.	Ni, Zi-Jian; Rong, Lili; Wang, Ning; Cao, Shuo	2019	International journal of information management	0268-4012 0143-6236 0268-4012	10.1016/j.ijinfomgt.2018.10.021	China is severely exposed to natural hazards. Currently, there are more than 5.5 million contingency plans for handling various incidents. Similar to those produced in other counties, the paper-based plans in China are limited in that emergency responders cannot easily extract helpful information for them. In this paper, a knowledge-based system will be proposed for providing different stakeholde…
254	An interoperable semantic service toolset with domain ontology for automated decision support in the end-of-life domain	Pease, Sarogini Grace; Sharpe, Richard; Lopik, Kate van; Tsalapati, Eleni; Goodall, Paul; Young, Bob; Conway, Paul; West, Andrew	2020	Future Generation Computer Systems	0167-739X	https://doi.org/10.1016/j.future.2020.06.008	In product-diverse, end-of-life (EoL) production lines the relevant markets, competitors and customer bases continuously change as new products are processed. The resale market itself changes with the influx of new products, as well as hardware and software discontinuations. Competitive business decision making is often performed by a human operator and may not be timely or fully informed. These …
255	Biomedical ontologies: What part-of is and isn’t	Schulz, Stefan; Kumar, Anand; Bittner, Thomas	2006	Journal of Biomedical Informatics	1532-0464	https://doi.org/10.1016/j.jbi.2005.11.003	Mereological relations such as part-of and its inverse has-part are fundamental to the description of the structure of living organisms. Whereas classical mereology focuses on individual entities, mereological relations in biomedical ontologies are generally asserted between classes of individuals. In general, this practice leaves some basic issues unanswered: type constraints of mereological rel…
256	An empirical analysis of ontology reuse in BioPortal	Ochs, Christopher; Perl, Yehoshua; Geller, James; Arabandi, Sivaram; Tudorache, Tania; Musen, Mark A.	2017	Journal of Biomedical Informatics	1532-0464	https://doi.org/10.1016/j.jbi.2017.05.021	Biomedical ontologies often reuse content (i.e., classes and properties) from other ontologies. Content reuse enables a consistent representation of a domain and reusing content can save an ontology author significant time and effort. Prior studies have investigated the existence of reused terms among the ontologies in the NCBO BioPortal, but as of yet there has not been a study investigating how…
257	Reuse of termino-ontological resources and text corpora for building a multilingual domain ontology: An application to Alzheimer’s disease	Dramé, Khadim; Diallo, Gayo; Delva, Fleur; Dartigues, Jean François; Mouillet, Evelyne; Salamon, Roger; Mougin, Fleur	2014	Journal of Biomedical Informatics	1532-0464	https://doi.org/10.1016/j.jbi.2013.12.013	Ontologies are useful tools for sharing and exchanging knowledge. However ontology construction is complex and often time consuming. In this paper, we present a method for building a bilingual domain ontology from textual and termino-ontological resources intended for semantic annotation and information retrieval of textual documents. This method combines two approaches: ontology learning from te…
258	SNOMED reaching its adolescence: Ontologists’ and logicians’ health check	Schulz, Stefan; Suntisrivaraporn, Boontawee; Baader, Franz; Boeker, Martin	2009	International Journal of Medical Informatics	1386-5056	https://doi.org/10.1016/j.ijmedinf.2008.06.004	After a critical review of the present architecture of SNOMED CT, addressing both logical and ontological issues, we present a roadmap toward an overall improvement and recommend the following actions: SNOMED CT's ontology, dictionary, and information model components should be kept separate. SNOMED CT's upper level should be re-arranged according to a standard upper level ontology. SNOMED CT con…
259	Integrating cancer diagnosis terminologies based on logical definitions of SNOMED CT concepts	Nikiema, Jean Noël; Jouhet, Vianney; Mougin, Fleur	2017	Journal of Biomedical Informatics	1532-0464	https://doi.org/10.1016/j.jbi.2017.08.013	In oncology, the reuse of data is confronted with the heterogeneity of terminologies. It is necessary to semantically integrate these distinct terminologies. The semantic integration by using a third terminology as a support is a conventional approach for the integration of two terminologies that are not very structured. The aim of our study was to use SNOMED CT for integrating ICD-10 and ICD-O3.…
260	A novel approach for connecting temporal-ontologies with blood flow simulations	Weichert, F.; Mertens, C.; Walczak, L.; Kern-Isberner, G.; Wagner, M.	2013	Journal of Biomedical Informatics	1532-0464	https://doi.org/10.1016/j.jbi.2013.03.004	In this paper an approach for developing a temporal domain ontology for biomedical simulations is introduced. The ideas are presented in the context of simulations of blood flow in aneurysms using the Lattice Boltzmann Method. The advantages in using ontologies are manyfold: On the one hand, ontologies having been proven to be able to provide medical special knowledge e.g., key parameters for sim…
261	Bridging the gap between medical and bioinformatics: An ontological case study in colon carcinoma	Kumar, Anand; Yip, Yum Lina; Smith, Barry; Grenon, Pierre	2006	Computers in Biology and Medicine	0010-4825	https://doi.org/10.1016/j.compbiomed.2005.07.001	Ontological principles are needed in order to bridge the gap between medical and biological information in a robust and computable fashion. This is essential in order to draw inferences across the levels of granularity which span medicine and biology, an example of which include the understanding of the roles of tumor markers in the development and progress of carcinoma. Such information integrat…
265	AgroPortal: A vocabulary and ontology repository for agronomy	Jonquet, Clément; Toulet, Anne; Arnaud, Elizabeth; Aubin, Sophie; Yeumo, Esther Dzalé; Emonet, Vincent; Graybeal, John; Laporte, Marie-Angélique; Musen, Mark A.; Pesce, Valeria; Larmande, Pierre	2018	Computers and Electronics in Agriculture	0168-1699	https://doi.org/10.1016/j.compag.2017.10.012	Many vocabularies and ontologies are produced to represent and annotate agronomic data. However, those ontologies are spread out, in different formats, of different size, with different structures and from overlapping domains. Therefore, there is need for a common platform to receive and host them, align them, and enabling their use in agro-informatics applications. By reusing the National Center…
266	A model-driven approach for representing clinical archetypes for Semantic Web environments	Martínez-Costa, Catalina; Menárguez-Tortosa, Marcos; Fernández-Breis, Jesualdo Tomás; Maldonado, José Alberto	2009	Journal of Biomedical Informatics	1532-0464	https://doi.org/10.1016/j.jbi.2008.05.005	The life-long clinical information of any person supported by electronic means configures his Electronic Health Record (EHR). This information is usually distributed among several independent and heterogeneous systems that may be syntactically or semantically incompatible. There are currently different standards for representing and exchanging EHR information among different systems. In advanced …
267	The ACGT Master Ontology and its applications – Towards an ontology-driven cancer research and management system	Brochhausen, Mathias; Spear, Andrew D.; Cocos, Cristian; Weiler, Gabriele; Martín, Luis; Anguita, Alberto; Stenzhorn, Holger; Daskalaki, Evangelia; Schera, Fatima; Schwarz, Ulf; Sfakianakis, Stelios; Kiefer, Stephan; Dörr, Martin; Graf, Norbert; Tsiknakis, Manolis	2011	Journal of Biomedical Informatics	1532-0464	https://doi.org/10.1016/j.jbi.2010.04.008	Objective: This paper introduces the objectives, methods and results of ontology development in the EU co-funded project Advancing Clinico-genomic Trials on Cancer – Open Grid Services for Improving Medical Knowledge Discovery (ACGT). While the available data in the life sciences has recently grown both in amount and quality, the full exploitation of it is being hindered by the use of different u…
268	The NCI Thesaurus quality assurance life cycle	Coronado, Sherri de; Wright, Lawrence W.; Fragoso, Gilberto; Haber, Margaret W.; Hahn-Dantona, Elizabeth A.; Hartel, Francis W.; Quan, Sharon L.; Safran, Tracy; Thomas, Nicole; Whiteman, Lori	2009	Journal of Biomedical Informatics	1532-0464	https://doi.org/10.1016/j.jbi.2009.01.003	The National Cancer Institute Enterprise Vocabulary Services (NCI EVS) uses a wide range of quality assurance (QA) techniques to maintain and extend NCI Thesaurus (NCIt). NCIt is a reference terminology and biomedical ontology used in a growing number of NCI and other systems that extend from translational and basic research through clinical care to public information and administrative activitie…
269	The Primary Care Research Object Model (PCROM): A Computable Information Model for Practice-based Primary Care Research	Speedie, Stuart M.; Taweel, Adel; Sim, Ida; Arvanitis, Theodoros N.; Delaney, Brendan; Peterson, Kevin A.	2008	Journal of the American Medical Informatics Association	1067-5027	https://doi.org/10.1197/jamia.M2745	Objectives Chronic disease prevalence and burden is growing, as is the need for applicable large community-based clinical trials of potential interventions. To support the development of clinical trial management systems for such trials, a community-based primary care research information model is needed. We analyzed the requirements of trials in this environment, and constructed an information m…
270	Mediation of foundation ontology based knowledge sources	Anjum, Najam A.; Harding, J. A.; Young, R. I.; Case, K.	2012	Computers in Industry	0166-3615	https://doi.org/10.1016/j.compind.2012.01.009	Ontologies are helpful in giving interoperable structures to sources of knowledge and information. This interoperability, however, is greatly hindered by the heterogeneity of independently developed ontologies which in turn increases the requirements for mediation systems to reconcile the differences. A core concepts ontology for a certain domain contained by a foundation ontology can be used to …
271	Semantic reengineering of business processes	Damjanović, Violeta	2010	Information Systems	0306-4379	https://doi.org/10.1016/j.is.2009.06.003	This paper discusses transforming ontological models into non-ontological models of business processes, when the process of articulating different data models is known as reengineering domains. As a crucial factor in achieving interoperability and semantic reengineering of the domains with the different levels of semantic representation (expressiveness), we point out the role of foundational onto…
272	Domain-specific summarization of Life-Science e-experiments from provenance traces	Gaignard, Alban; Montagnat, Johan; Gibaud, Bernard; Forestier, Germain; Glatard, Tristan	2014	Journal of Web Semantics	1570-8268	https://doi.org/10.1016/j.websem.2014.07.001	Translational research in Life-Science nowadays leverages e-Science platforms to analyze and produce huge amounts of data. With the unprecedented growth of Life-Science data repositories, identifying relevant data for analysis becomes increasingly difficult. The instrumentation of e-Science platforms with provenance tracking techniques provides useful information from a data analysis process desi…
273	Representing oncology in datasets: Standard or custom biomedical terminology?	Schulz, Stefan; Daumke, Philipp; Romacker, Martin; López-García, Pablo	2019	Informatics in Medicine Unlocked	2352-9148	https://doi.org/10.1016/j.imu.2019.100186	In this article we investigate whether a custom or an established biomedical terminology is recommended for coding cancer datasets. We first give an overview of biomedical terminology focused on the domain of cancer and introduce three clinical use cases to demonstrate how several cancer aspects can be coded using ICD-10, ICD-O, TNM, MeSH, NCIt, MedDRA, and SNOMED CT. The same collection of termi…
274	An ontology-based monitoring system for multi-source environmental observations	Masmoudi, Maroua; Lamine, Sana Ben Abdallah Ben; Zghal, Hajer Baazaoui; Karray, Mohamed Hedi; Archimede, Bernard	2018	Procedia Computer Science	1877-0509	https://doi.org/10.1016/j.procs.2018.08.076	Multi-source observed data are generally characterized by their syntactic, structural and semantic heterogeneities. A key challenge is the semantic interoperability of these data. In this context, we propose an ontology-based system that supports environmental monitoring. Our contributions could be resumed around 1) the construction of an ontology which allows to represent the knowledge and reuse…
275	An ontology of cancer therapies supporting interoperability and data consistency in EPRs	Eccher, Claudio; Scipioni, Alessandro; Miller, Alexis A.; Ferro, Antonella; Pisanelli, Domenico M.	2013	Computers in Biology and Medicine	0010-4825	https://doi.org/10.1016/j.compbiomed.2013.04.012	Ontologies can formally describe the semantics of the medical domain in an unambiguous and machine processable form, acting as a conceptual interface between different applications that must interoperate. In this paper we present an ontology of cancer therapies originally developed to bridge the gap between an oncologic Electronic Patient Record (EPR) and a guideline-based decision support system…
276	A fuzzy document clustering approach based on domain-specified ontology	Yue, Lin; Zuo, Wanli; Peng, Tao; Wang, Ying; Han, Xuming	2015	Data & Knowledge Engineering	0169-023X	https://doi.org/10.1016/j.datak.2015.04.008	Document clustering techniques include automatic document organization, topic extraction, fast information retrieval or filtering, etc. Numerous methods have been developed for document clustering research. Despite the advances achieved, however, document clustering still presents certain challenges such as optimizing feature selection for low-dimensional document representation and incorporating…
277	Clinical modeling—A critical analysis	Blobel, Bernd; Goossen, William; Brochhausen, Mathias	2014	International Journal of Medical Informatics	1386-5056	https://doi.org/10.1016/j.ijmedinf.2013.09.003	Background Modeling clinical processes (and their informational representation) is a prerequisite for optimally enabling and supporting high quality and safe care through information and communication technology and meaningful use of gathered information. Objectives The paper investigates existing approaches to clinical modeling, thereby systematically analyzing the underlying principles, the con…
278	Validating EHR clinical models using ontology patterns	Martínez-Costa, Catalina; Schulz, Stefan	2017	Journal of Biomedical Informatics	1532-0464	https://doi.org/10.1016/j.jbi.2017.11.001	Clinical models are artefacts that specify how information is structured in electronic health records (EHRs). However, the makeup of clinical models is not guided by any formal constraint beyond a semantically vague information model. We address this gap by advocating ontology design patterns as a mechanism that makes the semantics of clinical models explicit. This paper demonstrates how ontology…
280	A pilot ontological model of public health indicators	Surján, György; Szilágyi, Éva; Kováts, Tamás	2006	Computers in Biology and Medicine	0010-4825	https://doi.org/10.1016/j.compbiomed.2005.07.003	There are various public health databases in the world aiming to provide data to compare health conditions in different countries. Their data sets are more or less overlapping but data from different databases and different countries are hard to compare due to different definitions and interpretations. Our aim was to create a core ontological model that is able to represent public health indicato…
281	Quality evaluation of cancer study Common Data Elements using the UMLS Semantic Network	Jiang, Guoqian; Solbrig, Harold R.; Chute, Christopher G.	2011	Journal of Biomedical Informatics	1532-0464	https://doi.org/10.1016/j.jbi.2011.08.001	The binding of controlled terminology has been regarded as important for standardization of Common Data Elements (CDEs) in cancer research. However, the potential of such binding has not yet been fully explored, especially its quality assurance aspect. The objective of this study is to explore whether there is a relationship between terminological annotations and the UMLS Semantic Network (SN) th…
282	Auditing associative relations across two knowledge sources	Vizenor, Lowell T.; Bodenreider, Olivier; McCray, Alexa T.	2009	Journal of Biomedical Informatics	1532-0464	https://doi.org/10.1016/j.jbi.2009.01.004	Objectives This paper proposes a novel semantic method for auditing associative relations in biomedical terminologies. We tested our methodology on two Unified Medical Language System (UMLS) knowledge sources. Methods We use the UMLS semantic groups as high-level representations of the domain and range of relationships in the Metathesaurus and in the Semantic Network. A mapping created between Me…
283	Semantic Web in data mining and knowledge discovery: A comprehensive survey	Ristoski, Petar; Paulheim, Heiko	2016	Journal of Web Semantics	1570-8268	https://doi.org/10.1016/j.websem.2016.01.001	Data Mining and Knowledge Discovery in Databases (KDD) is a research field concerned with deriving higher-level insights from data. The tasks performed in that field are knowledge intensive and can often benefit from using additional knowledge from various sources. Therefore, many approaches have been proposed in this area that combine Semantic Web data with the data mining and knowledge discover…
284	Chapter 25 Knowledge Engineering	Schreiber, Guus	2008	Handbook of Knowledge Representation			Publisher Summary The discipline of knowledge engineering grew out of the early work on expert systems in the seventies. With the growing popularity of knowledge-based systems, there arose also a need for a systematic approach for building such systems, similar to methodologies in mainstream software engineering. Over the years, the discipline of knowledge engineering has evolved into the develop…
285	A pattern-based approach to a cell tracking ontology.	Burek, Patryk; Scherf, Nico; Herre, Heinrich	2019	Procedia Computer Science	1877-0509	https://doi.org/10.1016/j.procs.2019.09.237	Time-lapse microscopy has thoroughly transformed our understanding of biological motion and developmental dynamics from single cells to entire organisms. The increasing amount of cell tracking data demands the creation of tools to make extracted data searchable and interoperable between experiment and data types. In order to address that problem, the current paper reports on the progress in build…
286	Conto: A Protégé Plugin for Configuring Ontologies	LeClair, Andrew; Khedri, Ridha	2016	Procedia Computer Science	1877-0509	https://doi.org/10.1016/j.procs.2016.04.114	With the extensive proliferation of data, the efficient organization and integration of data has become exceedingly important. To achieve this, ontologies have been employed to govern the data by providing structure and a layer of abstraction over the data sources. However, the ontologies themselves present shortcomings in how they capture the definition of concepts of a domain. The definitions a…
287	Validating the semantics of a medical iconic language using ontological reasoning	Lamy, Jean-Baptiste; Soualmia, Lina F.; Kerdelhué, Gaëtan; Venot, Alain; Duclos, Catherine	2013	Journal of Biomedical Informatics	1532-0464	https://doi.org/10.1016/j.jbi.2012.08.006	To help clinicians read medical texts such as clinical practice guidelines or drug monographs, we proposed an iconic language called VCM. This language can use icons to represent the main medical concepts, including diseases, symptoms, treatments and follow-up procedures, by combining various pictograms, shapes and colors. However, the semantics of this language have not been formalized, and user…
288	New-Fangled Alignment of Ontologies for Content Based Semantic Image Retrieval	khodaskar, Anuja; Ladhake, Siddarth	2015	Procedia Computer Science	1877-0509	https://doi.org/10.1016/j.procs.2015.04.185	This paper highlights content based image retrieval system using alignment of ontologies. The traditional contents-based image retrieval systems using single ontology retrieve imprecise images. To overcome this weakness, proposed image retrieval system designed using core semantic multiple ontology which merges feature ontology, semantic feature ontology, user ontology and metadata ontology. Prop…
289	Translating standards into practice – One Semantic Web API for Gene Expression	Deus, Helena F.; Prud’hommeaux, Eric; Miller, Michael; Zhao, Jun; Malone, James; Adamusiak, Tomasz; McCusker, Jim; Das, Sudeshna; Serra, Philippe Rocca; Fox, Ronan; Marshall, M. Scott	2012	Journal of Biomedical Informatics	1532-0464	https://doi.org/10.1016/j.jbi.2012.03.002	Sharing and describing experimental results unambiguously with sufficient detail to enable replication of results is a fundamental tenet of scientific research. In today’s cluttered world of “-omics” sciences, data standards and standardized use of terminologies and ontologies for biomedical informatics play an important role in reporting high-throughput experiment results in formats that can be …
290	ADO: A disease ontology representing the domain knowledge specific to Alzheimer's disease	Malhotra, Ashutosh; Younesi, Erfan; Gündel, Michaela; Müller, Bernd; Heneka, Michael T.; Hofmann-Apitius, Martin	2014	Alzheimer's & Dementia	1552-5260	https://doi.org/10.1016/j.jalz.2013.02.009	Background Biomedical ontologies offer the capability to structure and represent domain-specific knowledge semantically. Disease-specific ontologies can facilitate knowledge exchange across multiple disciplines, and ontology-driven mining approaches can generate great value for modeling disease mechanisms. However, in the case of neurodegenerative diseases such as Alzheimer's disease, there is a …
291	Bio-medical entity extraction using support vector machines	Takeuchi, Koichi; Collier, Nigel	2005	Artificial Intelligence in Medicine	0933-3657	https://doi.org/10.1016/j.artmed.2004.07.019	Summary Objective: Support vector machines (SVMs) have achieved state-of-the-art performance in several classification tasks. In this article we apply them to the identification and semantic annotation of scientific and technical terminology in the domain of molecular biology. This illustrates the extensibility of the traditional named entity task to special domains with large-scale terminologies…
292	The Ontology of Systems Engineering: Towards a Computational Digital Engineering Semantic Framework	Orellana, Douglas; Mandrick, William	2019	Procedia Computer Science	1877-0509	https://doi.org/10.1016/j.procs.2019.05.079	The goal of implementing an enterprise digital engineering strategy is to improve data sharing throughout system conceptualization, development, manufacturing, operations, sustainment and their supporting organizations. Data sharing is a critical element of interoperability of models and other digital artifacts supporting the systems engineering process. Achieving interoperability within systems …
293	Modeling functional Magnetic Resonance Imaging (fMRI) experimental variables in the Ontology of Experimental Variables and Values (OoEVV)	Burns, Gully A. P. C.; Turner, Jessica A.	2013	NeuroImage	1053-8119	https://doi.org/10.1016/j.neuroimage.2013.05.024	Neuroimaging data is raw material for cognitive neuroscience experiments, leading to scientific knowledge about human neurological and psychological disease, language, perception, attention and ultimately, cognition. The structure of the variables used in the experimental design defines the structure of the data gathered in the experiments; this in turn structures the interpretative assertions th…
294	TrialX: Using semantic technologies to match patients to relevant clinical trials based on their Personal Health Records	Patel, Chintan; Gomadam, Karthik; Khan, Sharib; Garg, Vivek	2010	Journal of Web Semantics	1570-8268	https://doi.org/10.1016/j.websem.2010.08.004	Abstract Clinical trials form a critical link in the translation of basic biological research into routine clinical practice. However, finding eligible participants for clinical trials is a critical hurdle and a frequent cause for delays in the completion of trials. The lack of comprehensive, efficient, and consumer-friendly online tools has limited consumers’ ability to pro-actively find the rig…
296	Abstraction networks for terminologies: Supporting management of “big knowledge”	Halper, Michael; Gu, Huanying; Perl, Yehoshua; Ochs, Christopher	2015	Artificial Intelligence in Medicine	0933-3657	https://doi.org/10.1016/j.artmed.2015.03.005	Objective Terminologies and terminological systems have assumed important roles in many medical information processing environments, giving rise to the “big knowledge” challenge when terminological content comprises tens of thousands to millions of concepts arranged in a tangled web of relationships. Use and maintenance of knowledge structures on that scale can be daunting. The notion of abstract…
297	MEMOn: Modular Environmental Monitoring Ontology to link heterogeneous Earth observed data	Masmoudi, Maroua; Karray, Mohamed Hedi; Lamine, Sana Ben Abdallah Ben; Zghal, Hajer Baazaoui; Archimede, Bernard	2020	Environmental Modelling & Software	1364-8152	https://doi.org/10.1016/j.envsoft.2019.104581	Earth observation (EO) systems play a significant role in environmental monitoring and the prediction of natural disasters. These systems generate a massive amount of heterogeneous data stored in different formats. The exploitation of this data is still limited while, in most cases, data are not linked, and sources are not interoperable. Hence, data cannot be exploited as an interoperable global …
298	Ontologies in radiation oncology	Phillips, Mark H.; Serra, Lucas M.; Dekker, Andre; Ghosh, Preetam; Luk, Samuel M. H.; Kalet, Alan; Mayo, Charles	2020	Physica Medica	1120-1797	https://doi.org/10.1016/j.ejmp.2020.03.017	Ontologies are a formal, computer-compatible method for representing scientific knowledge about a given domain. They provide a standardized vocabulary, taxonomy and set of relations between concepts. When formatted in a standard way, they can be read and reasoned upon by computers as well as by humans. At the 2019 International Conference on the Use of Computers in Radiation Therapy, there was a …
299	Ontology based Clinical Practice Justification in Natural Language	Mendes, David; Rodrigues, Irene Pimenta; Baeta, Carlos	2013	Procedia Technology	2212-0173	https://doi.org/10.1016/j.protcy.2013.12.144	One of the most important contributions that any decision support system can make to achieve wide acceptance among any community is to be able to justify its own suggestions. When dealing with highly technical and scientifically advanced practitioners like medical doctors or any other related clinical workers, the ability to justify itself using the domain specialist usual terminology and technic…
300	A methodology for extending domain coverage in SemRep	Rosemblat, Graciela; Shin, Dongwook; Kilicoglu, Halil; Sneiderman, Charles; Rindflesch, Thomas C.	2013	Journal of Biomedical Informatics	1532-0464	https://doi.org/10.1016/j.jbi.2013.08.005	We describe a domain-independent methodology to extend SemRep coverage beyond the biomedical domain. SemRep, a natural language processing application originally designed for biomedical texts, uses the knowledge sources provided by the Unified Medical Language System (UMLS©). Ontological and terminological extensions to the system are needed in order to support other areas of knowledge. We extend…
302	An overview of the ONIONS project: Applying ontologies to the integration of medical terminologies	Gangemi, Aldo; Pisanelli, Domenico M.; Steve, Geri	1999	Data & Knowledge Engineering	0169-023X	https://doi.org/10.1016/S0169-023X(99)00023-3	The paper presents a review of the ONIONS project. ONIONS is committed to developing a large-scale, axiomatized ontology library for medical terminology. The developed methodology exploits a description logic-based design for the modules in the library and makes extended use of generic theories, thus creating a stratification of the modules. Terminological knowledge is acquired by conceptual anal…
303	Comparing ontology authoring workflows with Protégé: In the laboratory, in the tutorial and in the ‘wild’	Vigo, Markel; Matentzoglu, Nicolas; Jay, Caroline; Stevens, Robert	2019	Journal of Web Semantics	1570-8268	https://doi.org/10.1016/j.websem.2018.09.004	The development of ontology engineering tools has traditionally lacked a user-centred perspective, instead being guided by the need to address particular gaps indicated by anecdotal evidence. This has typically resulted in prototypes that do not obtain traction beyond a narrow scope. Understanding the authoring patterns of ontology engineers is crucial to informing the development of ontology eng…
304	HAIKU: A Semantic Framework for Surveillance of Healthcare-Associated Infections	Shaban-Nejad, Arash; Riazanov, Alexandre; Charland, Katia M.; Rose, Gregory W.; Baker, Christopher J. O.; Tamblyn, Robyn; Forster, Alan J.; Buckeridge, David L.	2012	Procedia Computer Science	1877-0509	https://doi.org/10.1016/j.procs.2012.06.151	Healthcare-Associated Infections (HAI) impose a substantial health and financial burden. Surveillance for HAI is essential to develop and evaluate prevention and control efforts. The traditional approaches to HAI surveillance are often limited in scope and efficiency by the need to manually obtain and integrate data from disparate paper charts and information systems. The considerable effort requ…
305	Semantic interoperability in the Internet of Things: An overview from the INTER-IoT perspective	Ganzha, Maria; Paprzycki, Marcin; Pawłowski, Wiesław; Szmeja, Paweł; Wasielewska, Katarzyna	2017	Journal of Network and Computer Applications	1084-8045	https://doi.org/10.1016/j.jnca.2016.08.007	The Internet of Things (IoT) idea, explored across the globe, brings about an important issue: how to achieve interoperability among multiple existing (and constantly created) IoT platforms. In this context, in January 2016, the European Commission has funded seven projects that are to deal with various aspects of interoperability in the Internet of Things. Among them, the INTER-IoT project is ai…
306	Reasoning and change management in modular ontologies	Stuckenschmidt, Heiner; Klein, Michel	2007	Data & Knowledge Engineering	0169-023X	https://doi.org/10.1016/j.datak.2007.02.001	The benefits of modular representations are well known from many areas of computer science. While in software engineering modularization is mainly a vehicle for supporting distributed development and re-use, in knowledge representation, the main goal of modularization is efficiency of reasoning. In this paper, we concentrate on the benefits of modularization in the context of ontologies, explicit…
307	yOWL: An ontology-driven knowledge base for yeast biologists	Villanueva-Rosales, Natalia; Dumontier, Michel	2008	Journal of Biomedical Informatics	1532-0464	https://doi.org/10.1016/j.jbi.2008.05.001	Knowledge management is an ongoing challenge for the biological community such that large, diverse and continuously growing information requires more sophisticated methods to store, integrate and query their knowledge. The semantic web initiative provides a new knowledge engineering framework to represent, share and discover information. In this paper, we describe our efforts towards the developm…
308	Biological data integration using Semantic Web technologies	Pasquier, C.	2008	Biochimie	0300-9084	https://doi.org/10.1016/j.biochi.2008.02.007	Current research in biology heavily depends on the availability and efficient use of information. In order to build new knowledge, various sources of biological data must often be combined. Semantic Web technologies, which provide a common framework allowing data to be shared and reused between applications, can be applied to the management of disseminated biological data. However, due to some sp…
309	Measuring expert performance at manually classifying domain entities under upper ontology classes	Stevens, Robert; Lord, Phillip; Malone, James; Matentzoglu, Nicolas	2019	Journal of Web Semantics	1570-8268	https://doi.org/10.1016/j.websem.2018.08.004	Background: Classifying entities in domain ontologies under upper ontology classes is a recommended task in ontology engineering to facilitate semantic interoperability and modelling consistency. Integrating upper ontologies this way is difficult and, despite emerging automated methods, remains a largely manual task. Problem: Little is known about how well experts perform at upper ontology integr…
310	Usability of upper level ontologies: The case of ResearchCyc	Conesa, Jordi; Storey, Veda C.; Sugumaran, Vijayan	2010	Data & Knowledge Engineering	0169-023X	https://doi.org/10.1016/j.datak.2009.08.002	Repositories of knowledge about the real world are intended to serve as surrogates for the meaning and context of terms and concepts. These are being developed at two levels: (1) individual domain ontologies that capture concepts about a particular application domain; and (2) upper level ontologies that contain massive amounts of knowledge about the real world and are domain independent. This pap…
311	Semantic SenseLab: Implementing the vision of the Semantic Web in neuroscience	Samwald, Matthias; Chen, Huajun; Ruttenberg, Alan; Lim, Ernest; Marenco, Luis; Miller, Perry; Shepherd, Gordon; Cheung, Kei-Hoi	2010	Artificial Intelligence in Medicine	0933-3657	https://doi.org/10.1016/j.artmed.2009.11.003	Objective Integrative neuroscience research needs a scalable informatics framework that enables semantic integration of diverse types of neuroscience data. This paper describes the use of the Web Ontology Language (OWL) and other Semantic Web technologies for the representation and integration of molecular-level data provided by several of SenseLab suite of neuroscience databases. Methods Based o…
312	Ontology driven health information systems architectures enable pHealth for empowered patients	Blobel, Bernd	2011	International Journal of Medical Informatics	1386-5056	https://doi.org/10.1016/j.ijmedinf.2010.10.004	The paradigm shift from organization-centered to managed care and on to personal health settings increases specialization and distribution of actors and services related to the health of patients or even citizens before becoming patients. As a consequence, extended communication and cooperation is required between all principals involved in health services such as persons, organizations, devices,…
313	Repairing mappings across biomedical ontologies by probabilistic reasoning and belief revision	Li, Weizhuo; Zhang, Songmao	2020	Knowledge-Based Systems	0950-7051	https://doi.org/10.1016/j.knosys.2020.106436	The ontology matching approaches identify correspondences among entities across ontologies, and the quality of ontology mappings is crucial for supporting knowledge sharing and reuse on the Semantic Web. In the annual Ontology Evaluation Alignment Initiative (OAEI) competitions, matching large and complex, real-world biomedical ontologies is one of the most challenging endeavors. As matching meth…
314	Smart manufacturing and DVSM based on an Ontological approach	Huang, Zhuoyu; Jowers, Casey; Dehghan-Manshadi, Ali; Dargusch, Matthew S.	2020	Computers in Industry	0166-3615	https://doi.org/10.1016/j.compind.2020.103189	Smart manufacturing is characterized as transparent shop floor production, rapid and intelligent responses to dynamic changes, and a utilization of high-performance inter-cooperation networks. Smart manufacturing and a global appetite for personalized products have transitioned industry from mass production into the age of mass customization. Increased autonomy is slowly changing customer expecta…
315	Object Recognition based on Surface Detection - A Review	Boruah, Abhijit; Kakoty, Nayan M.; Ali, Tazid	2018	Procedia Computer Science	1877-0509	https://doi.org/10.1016/j.procs.2018.07.009	The task of object recognition for prosthetic hands to perform effective grasping has been among the prime objectives in the domain of rehabilitation robotics. Pertaining to the sensors being implemented in the existing approaches, the object recognition techniques can be divided into vision based and haptic based categories. Most of the works on object recognition for prosthetic hands have adapt…
316	Narrative-based taxonomy distillation for effective indexing of text collections	Cataldi, Mario; Candan, K. Selçuk; Sapino, Maria Luisa	2012	Data & Knowledge Engineering	0169-023X	https://doi.org/10.1016/j.datak.2011.09.008	Taxonomies embody formalized knowledge and define aggregations between concepts/categories in a given domain, facilitating the organization of the data and making the contents easily accessible to the users. Since taxonomies have significant roles in data annotation, search and navigation, they are often carefully engineered. However, especially in domains, such as news, where content dynamically…
317	Toward an ontology-based framework for clinical research databases	Kong, Y. Megan; Dahlke, Carl; Xiang, Qun; Qian, Yu; Karp, David; Scheuermann, Richard H.	2011	Journal of Biomedical Informatics	1532-0464	https://doi.org/10.1016/j.jbi.2010.05.001	Clinical research includes a wide range of study designs from focused observational studies to complex interventional studies with multiple study arms, treatment and assessment events, and specimen procurement procedures. Participant characteristics from case report forms need to be integrated with molecular characteristics from mechanistic experiments on procured specimens. In order to capture a…
318	Desiderata for domain reference ontologies in biomedicine	Burgun, Anita	2006	Journal of Biomedical Informatics	1532-0464	https://doi.org/10.1016/j.jbi.2005.09.002	Domain reference ontologies represent knowledge about a particular part of the world in a way that is independent from specific objectives, through a theory of the domain. An example of reference ontology in biomedical informatics is the Foundational Model of Anatomy (FMA), an ontology of anatomy that covers the entire range of macroscopic, microscopic, and subcellular anatomy. The purpose of thi…
319	A time-indexed mereology for SUMO	Muñoz, Lydia Silva; Grüninger, Michael	2019	Data & Knowledge Engineering	0169-023X	https://doi.org/10.1016/j.datak.2019.101724	While the period of time during which a subprocess occurs is precisely the time during which the part-whole relation with its main process takes place, part-whole relations between objects do not obey such a rule. The parts of an object can exist before the object is conformed as such, and can survive its dismantlement. In fact, there are no means for knowing when, during the existence of the par…
320	An interactive ontology-driven information system for simulating background radiation and generating scenarios for testing special nuclear materials detection algorithms	Sorokine, Alexandre; Schlicher, Bob G.; Ward, Richard C.; Wright, Michael C.; Kruse, Kara L.; Bhaduri, Budhendra; Slepoy, Alexander	2015	Engineering Applications of Artificial Intelligence	0952-1976	https://doi.org/10.1016/j.engappai.2015.04.010	This paper describes an original approach to generate scenarios for the purpose of testing the algorithms used to detect special nuclear materials (SNM) that incorporates the use of ontologies. Separating the signal of SNM from the background requires sophisticated algorithms. To assist in developing such algorithms, there is a need for scenarios that capture a very wide range of variables affect…
321	Summarizing and visualizing structural changes during the evolution of biomedical ontologies using a Diff Abstraction Network	Ochs, Christopher; Perl, Yehoshua; Geller, James; Haendel, Melissa; Brush, Matthew; Arabandi, Sivaram; Tu, Samson	2015	Journal of Biomedical Informatics	1532-0464	https://doi.org/10.1016/j.jbi.2015.05.018	Biomedical ontologies are a critical component in biomedical research and practice. As an ontology evolves, its structure and content change in response to additions, deletions and updates. When editing a biomedical ontology, small local updates may affect large portions of the ontology, leading to unintended and potentially erroneous changes. Such unwanted side effects often go unnoticed since b…
322	A concept ideation framework for medical device design	Hagedorn, Thomas J.; Grosse, Ian R.; Krishnamurty, Sundar	2015	Journal of Biomedical Informatics	1532-0464	https://doi.org/10.1016/j.jbi.2015.04.010	Medical device design is a challenging process, often requiring collaboration between medical and engineering domain experts. This collaboration can be best institutionalized through systematic knowledge transfer between the two domains coupled with effective knowledge management throughout the design innovation process. Toward this goal, we present the development of a semantic framework for med…
323	A product life cycle ontology for additive manufacturing	Ali, Munira Mohd; Rai, Rahul; Otte, J. Neil; Smith, Barry	2019	Computers in Industry	0166-3615	https://doi.org/10.1016/j.compind.2018.12.007	The manufacturing industry is evolving rapidly, becoming more complex, more interconnected, and more geographically distributed. Competitive pressure and diversity of consumer demand are driving manufacturing companies to rely more and more on improved knowledge management practices. As a result, multiple software systems are being created to support the integration of data across the product lif…
324	Towards the ontological foundations of symbolic biological theories	Schulz, Stefan; Hahn, Udo	2007	Artificial Intelligence in Medicine	0933-3657	https://doi.org/10.1016/j.artmed.2006.12.001	Summary Objective Support for the symbolic representation of the physical structure of living organisms by an ontologically solid and logically sound foundation as a basis for formal reasoning. Methods A set of canonical relations and attributes necessary for empirically adequate descriptions of biological entities is proposed. Results It is shown how a broad range of biological organisms and the…
325	Exploring semantic groups through visual approaches	Bodenreider, Olivier; McCray, Alexa T.	2003	Journal of Biomedical Informatics	1532-0464	https://doi.org/10.1016/j.jbi.2003.11.002	Objectives. We investigate several visual approaches for exploring semantic groups, a grouping of semantic types from the Unified Medical Language System (UMLS) semantic network. We are particularly interested in the semantic coherence of the groups, and we use the semantic relationships as important indicators of that coherence. Methods. First, we create a radial representation of the number of …
326	Towards a core ontology for robotics and automation	Prestes, Edson; Carbonera, Joel Luis; Fiorini, Sandro Rama; Jorge, Vitor A. M.; Abel, Mara; Madhavan, Raj; Locoro, Angela; Goncalves, Paulo; Barreto, Marcos E.; Habib, Maki; Chibani, Abdelghani; Gérard, Sébastien; Amirat, Yacine; Schlenoff, Craig	2013	Robotics and Autonomous Systems	0921-8890	https://doi.org/10.1016/j.robot.2013.04.005	In this paper, we present the current results of the newly formed IEEE-RAS Working Group, named Ontologies for Robotics and Automation. In particular, we introduce a core ontology that encompasses a set of terms commonly used in Robotics and Automation along with the methodology we have adopted. Our work uses ISO/FDIS 8373 standard developed by the ISO/TC184/SC2 Working Group as a reference. This…
327	Designing ontologies for higher level fusion	Little, Eric G.; Rogova, Galina L.	2009	Information Fusion	1566-2535	https://doi.org/10.1016/j.inffus.2008.05.006	The purpose of higher level fusion is to produce contextual understanding of the states of the environment and prediction of their impact in relation to specific goals of decision makers. One of the main challenges of designing higher level fusion processes is to provide a formal structure of domain-specific types of entities, attributes, situations, and the relations between them for reasoning a…
328	Integration of prostate cancer clinical data using an ontology	Min, Hua; Manion, Frank J.; Goralczyk, Elizabeth; Wong, Yu-Ning; Ross, Eric; Beck, J. Robert	2009	Journal of Biomedical Informatics	1532-0464	https://doi.org/10.1016/j.jbi.2009.05.007	It is increasingly important for investigators to efficiently and effectively access, interpret, and analyze the data from diverse biological, literature, and annotation sources in a unified way. The heterogeneity of biomedical data and the lack of metadata are the primary sources of the difficulty for integration, presenting major challenges to effective search and retrieval of the information. …
329	Towards a Novel and Generic Approach for OWL Ontology Weighting	Abioui, Hasna; Idarrou, Ali; Bouzit, Ali; Mammass, Driss	2018	Procedia Computer Science	1877-0509	https://doi.org/10.1016/j.procs.2018.01.140	Semantic search is qualified – by web-related enterprises as well as, academic research – as a key technology, ensuring important improvements in terms of shared data understanding, while it leads to refined and targeted interpretations. Accordingly, ontologies are the focal asset for a well-functioning semantic search approach, since their ability to share, represent and reuse explicit and seman…
330	DOLCE ergo SUMO: On foundational and domain models in the SmartWeb Integrated Ontology (SWIntO)	Oberle, Daniel; Ankolekar, Anupriya; Hitzler, Pascal; Cimiano, Philipp; Sintek, Michael; Kiesel, Malte; Mougouie, Babak; Baumann, Stephan; Vembu, Shankar; Romanelli, Massimo; Buitelaar, Paul; Engel, Ralf; Sonntag, Daniel; Reithinger, Norbert; Loos, Berenike; Zorn, Hans-Peter; Micelli, Vanessa; Porzel, Robert; Schmidt, Christian; Weiten, Moritz; Burkhardt, Felix; Zhou, Jianshen	2007	Journal of Web Semantics	1570-8268	https://doi.org/10.1016/j.websem.2007.06.002	Increased availability of mobile computing, such as personal digital assistants (PDAs), creates the potential for constant and intelligent access to up-to-date, integrated and detailed information from the Web, regardless of one's actual geographical position. Intelligent question-answering requires the representation of knowledge from various domains, such as the navigational and discourse conte…
331	A survey on knowledge representation in materials science and engineering: An ontological perspective	Zhang, Xiaoming; Zhao, Chongchong; Wang, Xiang	2015	Computers in Industry	0166-3615	https://doi.org/10.1016/j.compind.2015.07.005	Informatics in materials science and engineering is playing more and more important role in contemporary society. Intelligent applications such as new materials discovery, materials selection, life prediction, and failure analysis heavily depend on diverse materials information and knowledge. However, most of the existing materials information scatters in different heterogeneous sources without p…
332	Semantic annotation of the CEREALAB database by the AGROVOC linked dataset	Beneventano, Domenico; Bergamaschi, Sonia; Sorrentino, Serena; Vincini, Maurizio; Benedetti, Fabio	2015	Ecological Informatics	1574-9541	https://doi.org/10.1016/j.ecoinf.2014.07.002	Nowadays, there has been an increment of open data government initiatives promoting the idea that particular data should be freely published. However, the great majority of these resources is published in an unstructured format and is typically accessed only by closed communities. Starting from these considerations, in a previous work related to a dataset on young workers on non permanent contrac…
333	Energy, growth, and evolution: Towards a naturalistic ontology of economics	Herrmann-Pillath, Carsten	2015	Ecological Economics	0921-8009	https://doi.org/10.1016/j.ecolecon.2014.11.014	In recent years new approaches to the integration of economics and thermodynamics have been developed which build on the physics of open non-equilibrium systems, the so-called ‘Maximum Entropy Production Principle’. I review these contributions in the light of the implications for economic ontology, i.e. the question what the fundamental constituents of real world economic phenomena are. I argue …
334	Proposal of an ontology for Mental Health Management in Brazil	Yamada, Diego Bettiol; Yoshiura, Vinicius Tohoru; Miyoshi, Newton Shydeo Brandão; Lima, Inácia Bezerra de; Shinoda, Gustavo Yukiu Usumoto; Rijo, Rui Pedro Charters Lopes; Marques, João Mazzoncini de Azevedo; Cruz-Cunha, Maria Manuela; Alves, Domingos	2018	Procedia Computer Science	1877-0509	https://doi.org/10.1016/j.procs.2018.10.020	Mental illness represent a large part of public health problems worldwide. Additionally, mental health managers need to make decisions based on complex data from dispersed sources with low levels of standardization and integration. This generally hinders knowledge extraction and its use as a reference to provide useful indicators and reports for efficient decision making. In this context, the int…
335	The quest for standards in medical imaging	Gibaud, Bernard	2011	European Journal of Radiology	0720-048X	https://doi.org/10.1016/j.ejrad.2010.05.003	This article focuses on standards supporting interoperability and system integration in the medical imaging domain. We introduce the basic concepts and actors and we review the most salient achievements in this domain, especially with the DICOM standard, and the definition of IHE integration profiles. We analyze and discuss what was successful, and what could still be more widely adopted by indus…
336	The unexpected high practical value of medical ontologies	Pinciroli, Francesco; Pisanelli, Domenico M.	2006	Computers in Biology and Medicine	0010-4825	https://doi.org/10.1016/j.compbiomed.2005.04.006	Ontology is no longer a mere research topic, but its relevance has been recognized in several practical fields. Current applications areas include natural language translation, e-commerce, geographic information systems, legal information systems and biology and medicine. It is the backbone of solid and effective applications in health care and can help to build more powerful and more interoperab…
337	MoSuMo: A Semantic Web service to generate electrostatic potentials across solvent excluded protein surfaces and binding pockets	Gawronski, Alexander; Dumontier, Michel	2011	Computers & Graphics	0097-8493	https://doi.org/10.1016/j.cag.2011.03.039	Investigations of molecular interactions can benefit from knowledge of the regions that correspond to binding sites and electrostatic potentials across molecular surfaces. In support of simulations aimed at a coarser level of granularity than molecular dynamics, we have developed MoSuMo, a SADI-based Semantic Web service for generating molecular surfaces from a set of 3D atomic coordinates. MoSuM…
338	A Lightweight Approach to the Multi-perspective Modeling of Processes and Objects	Bureka, Patryk; Herre, Heinrich	2020	Procedia Computer Science	1877-0509	https://doi.org/10.1016/j.procs.2020.09.101	Process modeling has a broad range of applications, varying from business and system engineering, via artifact design, up to natural process modeling utilized in natural sciences. Over the last decades, various sophisticated languages and frameworks have been developed to support process modeling. The current paper discusses an approach to process modeling, which is, in contrast to many existing …
339	Comparison of character-level and part of speech features for name recognition in biomedical texts	Collier, Nigel; Takeuchi, Koichi	2004	Journal of Biomedical Informatics	1532-0464	https://doi.org/10.1016/j.jbi.2004.08.008	The immense volume of data which is now available from experiments in molecular biology has led to an explosion in reported results most of which are available only in unstructured text format. For this reason there has been great interest in the task of text mining to aid in fact extraction, document screening, citation analysis, and linkage with large gene and gene-product databases. In particu…
340	The AMTEx approach in the medical document indexing and retrieval application	Hliaoutakis, Angelos; Zervanou, Kaliope; Petrakis, Euripides G. M.	2009	Data & Knowledge Engineering	0169-023X	https://doi.org/10.1016/j.datak.2008.11.002	AMTEx is a medical document indexing method, specifically designed for the automatic indexing of documents in large medical collections, such as MEDLINE, the premier bibliographic database of the US National Library of Medicine (NLM). AMTEx combines MeSH, the terminological thesaurus resource of NLM, with a well-established method for extraction of terminology, the C/NC-value method. The performa…
341	Text mining of cancer-related information: Review of current status and future directions	Spasić, Irena; Livsey, Jacqueline; Keane, John A.; Nenadić, Goran	2014	International Journal of Medical Informatics	1386-5056	https://doi.org/10.1016/j.ijmedinf.2014.06.009	Purpose This paper reviews the research literature on text mining (TM) with the aim to find out (1) which cancer domains have been the subject of TM efforts, (2) which knowledge resources can support TM of cancer-related information and (3) to what extent systems that rely on knowledge and computational methods can convert text data into useful clinical information. These questions were used to d…
342	Automatic image annotation and semantic based image retrieval for medical domain	Burdescu, Dumitru Dan; Mihai, Cristian Gabriel; Stanescu, Liana; Brezovan, Marius	2013	Neurocomputing	0925-2312	https://doi.org/10.1016/j.neucom.2012.07.030	Automatic image annotation is the process of assigning meaningful words to an image taking into account its content. This process is of great interest as it allows indexing, retrieving, and understanding of large collections of image data. This paper presents a system used in the medical domain for three distinct tasks: image annotation, semantic based image retrieval and content based image retr…
343	Organism, machine, artifact: The conceptual and normative challenges of synthetic biology	Holm, Sune; Powell, Russell	2013	Studies in History and Philosophy of Science Part C: Studies in History and Philosophy of Biological and Biomedical Sciences	1369-8486	https://doi.org/10.1016/j.shpsc.2013.05.009	Synthetic biology is an emerging discipline that aims to apply rational engineering principles in the design and creation of organisms that are exquisitely tailored to human ends. The creation of artificial life raises conceptual, methodological and normative challenges that are ripe for philosophical investigation. This special issue examines the defining concepts and methods of synthetic biolog…
344	A domain-independent process for automatic ontology population from text	Faria, Carla; Serra, Ivo; Girardi, Rosario	2014	Science of Computer Programming	0167-6423	https://doi.org/10.1016/j.scico.2013.12.005	Ontology Population looks for instantiating the constituent elements of an ontology, like properties and non-taxonomic relationships. Manual population by domain experts and knowledge engineers is an expensive and time consuming task. Fast ontology population is critical for the success of knowledge-based applications. Thus, automatic or semi-automatic approaches are needed. This work proposes a …
345	Analyzing user interactions with biomedical ontologies: A visual perspective	Kamdar, Maulik R.; Walk, Simon; Tudorache, Tania; Musen, Mark A.	2018	Journal of Web Semantics	1570-8268	https://doi.org/10.1016/j.websem.2017.12.002	Biomedical ontologies are large: Several ontologies in the BioPortal repository contain thousands or even hundreds of thousands of entities. The development and maintenance of such large ontologies is difficult. To support ontology authors and repository developers in their work, it is crucial to improve our understanding of how these ontologies are explored, queried, reused, and used in downstre…
346	BioOntoVerb: A top level ontology based framework to populate biomedical ontologies from texts	Ruiz-Martínez, Juana María; Valencia-García, Rafael; Martínez-Béjar, Rodrigo; Hoffmann, Achim	2012	Knowledge-Based Systems	0950-7051	https://doi.org/10.1016/j.knosys.2012.06.002	The Semantic Web can be conceived as an extension of the current Web where information is given well-defined meaning. In this scenario ontologies are crucial since they provide meaning and facilitate the search for contents and information. Ontology population is a knowledge acquisition activity used to transform data sources into instance data. The instantiation of ontologies with new knowledge …
347	Part-whole representation and reasoning in formal biomedical ontologies	Schulz, Stefan; Hahn, Udo	2005	Artificial Intelligence in Medicine	0933-3657	https://doi.org/10.1016/j.artmed.2004.11.005	Summary Objective:Biomedical ontologies are typically structured in a biaxial way, reflecting both a taxonomic (is-a) and a partonomic (part-of) hierarchy. Commonly used biomedical terminologies, which incorporate such distinctions excel in terms of broad coverage but lack a rigid formal foundation. The latter, however, is a prerequisite for automated reasoning. For the biomedical domain, it is n…
348	BNO—An ontology for understanding the transittability of complex biomolecular networks	Ayadi, Ali; Zanni-Merk, Cecilia; Beuvron, François de Bertrand de; Thompson, Julie; Krichen, Saoussen	2019	Journal of Web Semantics	1570-8268	https://doi.org/10.1016/j.websem.2019.01.002	Analysis of biological systems is being progressively facilitated by computational tools. Most of these tools are based on qualitative and numerical methods. However, they are not always evident, and there is an increasing need to provide an additional semantic layer. Semantic technologies, especially ontologies, are one of the tools frequently used for this purpose. Indeed, they are indispensabl…
349	Formal ontology for natural language processing and the integration of biomedical databases	Simon, Jonathan; Santos, Mariana Dos; Fielding, James; Smith, Barry	2006	International Journal of Medical Informatics	1386-5056	https://doi.org/10.1016/j.ijmedinf.2005.07.015	Summary The central hypothesis underlying this communication is that the methodology and conceptual rigor of a philosophically inspired formal ontology can bring significant benefits in the development and maintenance of application ontologies [A. Flett, M. Dos Santos, W. Ceusters, Some Ontology Engineering Procedures and their Supporting Technologies, EKAW2002, 2003]. This hypothesis has been te…
350	Towards an ontological theory of substance intolerance and hypersensitivity	Hogan, William R.	2011	Journal of Biomedical Informatics	1532-0464	https://doi.org/10.1016/j.jbi.2010.02.003	A proper ontological treatment of intolerance—including hypersensitivity—to various substances is critical to patient care and research. However, existing methods and standards for documenting these conditions have flaws that inhibit these goals, especially translational research that bridges the two activities. In response, I outline a realist approach to the ontology of substance intolerance, i…
351	NanoParticle Ontology for cancer nanotechnology research	Thomas, Dennis G.; Pappu, Rohit V.; Baker, Nathan A.	2011	Journal of Biomedical Informatics	1532-0464	https://doi.org/10.1016/j.jbi.2010.03.001	Data generated from cancer nanotechnology research are so diverse and large in volume that it is difficult to share and efficiently use them without informatics tools. In particular, ontologies that provide a unifying knowledge framework for annotating the data are required to facilitate the semantic integration, knowledge-based searching, unambiguous interpretation, mining and inferencing of the…
352	KnowBaSICS-M: An ontology-based system for semantic management of medical problems and computerised algorithmic solutions	Bratsas, Charalampos; Koutkias, Vassilis; Kaimakamis, Evangelos; Bamidis, Panagiotis D.; Pangalos, George Ι; Maglaveras, Nicos	2007	Computer Methods and Programs in Biomedicine	0169-2607	https://doi.org/10.1016/j.cmpb.2007.06.005	In this paper, an ontology-based system (KnowBaSICS-M) is presented for the semantic management of Medical Computational Problems (MCPs), i.e., medical problems and computerised algorithmic solutions. The system provides an open environment, which: (1) allows clinicians and researchers to retrieve potential algorithmic solutions pertinent to a medical problem and (2) enables incorporation of new …
353	Methods in biomedical ontology	Yu, Alexander C.	2006	Journal of Biomedical Informatics	1532-0464	https://doi.org/10.1016/j.jbi.2005.11.006	Research on ontologies is becoming widespread in the biomedical informatics community. At the same time, it has become apparent that the challenges of properly constructing and maintaining ontologies have proven more difficult than many workers in the field initially expected. Discovering general, feasible methods has thus become a central activity for many of those hoping to reap the benefits of…
354	Towards semantic-driven high-content image analysis: An operational instantiation for mitosis detection in digital histopathology	Racoceanu, D.; Capron, F.	2015	Computerized Medical Imaging and Graphics	0895-6111	https://doi.org/10.1016/j.compmedimag.2014.09.004	This study concerns a novel symbolic cognitive vision framework emerged from the Cognitive Microscopy (MICO11MICO – a French National Research Agency, Technologies for health and autonomy (ANR TecSan) project: https://www.comp.nus.edu.sg/∼danielr/projects.htm.) initiative. MICO aims at supporting the evolution towards digital pathology, by studying cognitive clinical-compliant protocols involving…
355	An integrated framework for automatic ontology learning from unstructured repair text data for effective fault detection and isolation in automotive domain	Rajpathak, Dnyanesh; Xu, Yiming; Gibbs, Ian	2020	Computers in Industry	0166-3615	https://doi.org/10.1016/j.compind.2020.103338	A real-life hierarchical classification system is developed to automatically extract a domain ontology from repair data collected during the warranty period of an original equipment manufacturer (OEM), e.g. automotive. Given the complex nature of products, failures may occur impacting consumers and to limit their adverse effect it is critical to react through effective fault detection and isolati…
356	Methodological guidelines for reusing general ontologies	Fernández-López, Mariano; Gómez-Pérez, Asunción; Suárez-Figueroa, Mari Carmen	2013	Data & Knowledge Engineering	0169-023X	https://doi.org/10.1016/j.datak.2013.03.006	Currently, there is a great deal of well-founded explicit knowledge formalizing general notions, such as time concepts and the part_of relation. Yet, it is often the case that instead of reusing ontologies that implement such notions (the so-called general ontologies), engineers create procedural programs that implicitly implement this knowledge. They do not save time and code by reusing explicit…
357	Supporting ontological analysis of taxonomic relationships	Welty, Christopher; Guarino, Nicola	2001	Data & Knowledge Engineering	0169-023X	https://doi.org/10.1016/S0169-023X(01)00030-1	Taxonomies are an important part of conceptual modeling. They provide substantial structural information, and are typically the key elements in integration efforts, however there has been little guidance as to what makes a proper taxonomy. We have adopted several notions from the philosophical practice of formal ontology, and adapted them for use in information systems. These tools, identity, ess…
358	An ontological system for interoperable spatial generalisation in biodiversity monitoring	Nieland, Simon; Moran, Niklas; Kleinschmit, Birgit; Förster, Michael	2015	Computers & Geosciences	0098-3004	https://doi.org/10.1016/j.cageo.2015.08.006	Semantic heterogeneity remains a barrier to data comparability and standardisation of results in different fields of spatial research. Because of its thematic complexity, differing acquisition methods and national nomenclatures, interoperability of biodiversity monitoring information is especially difficult. Since data collection methods and interpretation manuals broadly vary there is a need for…
359	Evaluating ontology mapping techniques: An experiment in public safety information sharing	Kaza, Siddharth; Chen, Hsinchun	2008	Decision Support Systems	0167-9236	https://doi.org/10.1016/j.dss.2007.12.007	The public safety community in the United States consists of thousands of local, state, and federal agencies, each with its own information system. In the past few years, there has been a thrust on the seamless interoperability of systems in these agencies. Ontology-based interoperability approaches in the public safety domain need to rely on mapping between ontologies as each agency has its own …
360	An ontology-centric architecture for extensible scientific data management systems	Li, Yuan-Fang; Kennedy, Gavin; Ngoran, Faith; Wu, Philip; Hunter, Jane	2013	Future Generation Computer Systems	0167-739X	https://doi.org/10.1016/j.future.2011.06.007	Data management has become a critical challenge faced by a wide array of scientific disciplines in which the provision of sound data management is pivotal to the achievements and impact of research projects. Massive and rapidly expanding amounts of data combined with data models that evolve over time contribute to making data management an increasingly challenging task that warrants a new approac…
361	Genetic and expression differences between putative ecotypes of Sphagnum denticulatum Brid. (Sphagnaceae: Bryophyta) subjected to drought stress and rehydration	Winnicka, Katarzyna; Melosik, Iwona	2019	Perspectives in Plant Ecology, Evolution and Systematics	1433-8319	https://doi.org/10.1016/j.ppees.2019.02.004	Adverse changes in vegetation occur as the effect of the progressive drying of peatlands, leading to the disappearance of peat mosses (Sphagnum), a key component of these ecosystems. We report gene expression divergence for two putative ecotypes of S. denticulatum collected from contrasted habitats under the threat of drought. We used cDNA-amplified fragment length polymorphism (cDNA-AFLP) as the…
362	Automated essay evaluation with semantic analysis	Zupanc, Kaja; Bosnić, Zoran	2017	Knowledge-Based Systems	0950-7051	https://doi.org/10.1016/j.knosys.2017.01.006	Essays are considered as the most useful tool to assess learning outcomes, guide students’ learning process and to measure their progress. Manual grading of students’ essays is a time-consuming process, but is nevertheless necessary. Automated essay evaluation represents a practical solution to this task, however, its main weakness is the predominant focus on vocabulary and text syntax, and limit…
363	Linking from Schema.org microdata to the Web of Linked Data: An empirical assessment	Nogales, Alberto; Sicilia, Miguel-Angel; Sánchez-Alonso, Salvador; Garcia-Barriocanal, Elena	2016	Computer Standards & Interfaces	0920-5489	https://doi.org/10.1016/j.csi.2015.12.003	The increase of Linked Open Data (LOD) usage has grown in the last few years, and the number of datasets available is considerably higher. Taking this into account, another way to make data available is microdata, whose aim is to make information more understandable for search engines to give better results. The Schema.org vocabulary was created for the enrichment of microdata as a way to give mo…
364	An automatic method for reporting the quality of thesauri	Lacasta, Javier; Falquet, Gilles; Zarazaga-Soria, F. Javier; Nogueras-Iso, Javier	2016	Data & Knowledge Engineering	0169-023X	https://doi.org/10.1016/j.datak.2016.05.002	Thesauri are knowledge models commonly used for information classification and retrieval whose structure is defined by standards such as the ISO 25964. However, when creators do not correctly follow the specifications, they construct models with inadequate concepts or relations that provide a limited usability. This paper describes a process that automatically analyzes the thesaurus properties an…
365	Concept relation extraction using Naïve Bayes classifier for ontology-based question answering systems	kumar, G. Suresh; Zayaraz, G.	2015	Journal of King Saud University - Computer and Information Sciences	1319-1578	https://doi.org/10.1016/j.jksuci.2014.03.001	Domain ontology is used as a reliable source of knowledge in information retrieval systems such as question answering systems. Automatic ontology construction is possible by extracting concept relations from unstructured large-scale text. In this paper, we propose a methodology to extract concept relations from unstructured text using a syntactic and semantic probability-based Naïve Bayes classif…
366	Construction of the Ontology-Based Agricultural Knowledge Management System	ZHENG, Ye-lu; HE, Qi-yun; QIAN, Ping; LI, Ze	2012	Journal of Integrative Agriculture	2095-3119	https://doi.org/10.1016/S2095-3119(12)60059-8	Ontology is the formal representation of concepts and their mutual relations. It has wide application potential in the classification of agricultural information, the construction of information and knowledge database, the research and development of intelligent search engine, as well as the realization of cooperative information service, etc. In this research, an ontology-based agricultural know…
367	Automatic interpretation of loosely encoded input	Fan, James; Barker, Ken; Porter, Bruce	2009	Artificial Intelligence	0004-3702	https://doi.org/10.1016/j.artint.2008.10.007	Knowledge-based systems are often brittle when given unanticipated input, i.e. assertions or queries that misalign with the ontology of the knowledge base. We call such misalignments “loose speak”. We found that loose speak occurs frequently in interactions with knowledge-based systems, but with such regularity that it often can be interpreted and corrected algorithmically. We also found that the…
368	OntoCR: A CEN/ISO-13606 clinical repository based on ontologies	Lozano-Rubí, Raimundo; Carrero, Adolfo Muñoz; Balazote, Pablo Serrano; Pastor, Xavier	2016	Journal of Biomedical Informatics	1532-0464	https://doi.org/10.1016/j.jbi.2016.02.007	Objective To design a new semantically interoperable clinical repository, based on ontologies, conforming to CEN/ISO 13606 standard. Materials and methods The approach followed is to extend OntoCRF, a framework for the development of clinical repositories based on ontologies. The meta-model of OntoCRF has been extended by incorporating an OWL model integrating CEN/ISO 13606, ISO 21090 and SNOMED …
369	Spatiotemporal and semantic information extraction from Web news reports about natural hazards	Wang, Wei; Stewart, Kathleen	2015	Computers, Environment and Urban Systems	0198-9715	https://doi.org/10.1016/j.compenvurbsys.2014.11.001	In the field of geographic information science, modeling geographic dynamics based on spatiotemporal information extracted from the Web, especially unconstructed data such as online news reports, is a growing area of research. Extracting spatiotemporal and semantic information from a set of Web documents enables us to build a rich representation of geographic knowledge described in text, capturin…
370	HL7 ontology and mobile agents for interoperability in heterogeneous medical information systems	Orgun, B.; Vu, J.	2006	Computers in Biology and Medicine	0010-4825	https://doi.org/10.1016/j.compbiomed.2005.04.010	Modern medical information management is a knowledge intensive activity requiring a high degree of interoperability across various health management entities. Ontology-based multi-agent systems provide a framework for interactions in a distributed medical systems environment without the limitations of a more traditional client server approach. In this paper, we describe electronic Medical Agent S…
371	From collective intentionality to intentional collectives: An ontological perspective	Bottazzi, Emanuele; Catenacci, Carola; Gangemi, Aldo; Lehmann, Jos	2006	Cognitive Systems Research	1389-0417	https://doi.org/10.1016/j.cogsys.2005.11.009	This paper presents a methodology for the analysis of the entities which the discourse on collective intentionality usually refers to. We aim, in particular, at characterizing the notion of intentional collective. Based on reviews of the relevant literature, we apply three formal-ontological tools of our choice (namely, DOLCE, DnS, and DDPO) to the treatment of the notions of collection, agent, p…
372	Databases and the geometry of knowledge	Brazhnik, Olga	2007	Data & Knowledge Engineering	0169-023X	https://doi.org/10.1016/j.datak.2006.05.005	Based on a geometrical interpretation of knowledge space, this work defines relationships between data, concepts and models, and establishes a framework for their integration. Concepts encapsulate our knowledge and provide a basis for data acquisition. They change as we learn more. Every discipline operates with a specific set of concepts organized in models. In order to co-process data collected…
373	A mereotopological product relationship description approach for assembly oriented design	Demoly, Frédéric; Matsokis, Aristeidis; Kiritsis, Dimitris	2012	Robotics and Computer-Integrated Manufacturing	0736-5845	https://doi.org/10.1016/j.rcim.2012.03.003	This paper describes a novel approach for integrated assembly modelling and planning. The main objective is to make assembly information accessible and exploitable by data management systems and computer-aided X tools in order to support product architects and designers. Product information and knowledge as well as the related assembly sequence require a logical foundation in order to be managed …
374	A framework to represent, capture, and trace ontology development processes	Vegetti, Marcela; Roldán, Luciana; Gonnet, Silvio; Leone, Horacio; Henning, Gabriela	2016	Engineering Applications of Artificial Intelligence	0952-1976	https://doi.org/10.1016/j.engappai.2016.10.001	This article presents OntoTracED, a comprehensive framework to represent, capture and trace ontology development processes. It has three components: (i) a conceptual model that defines the framework foundations, (ii) an ontological engineering domain model (OEDM), which specifies and describes design objects, as well as those operations that are particular to a specific ontology development metho…
375	A multi-agent model system for land-use change simulation	Ralha, Célia G.; Abreu, Carolina G.; Coelho, Cássio G. C.; Zaghetto, Alexandre; Macchiavello, Bruno; Machado, Ricardo B.	2013	Environmental Modelling & Software	1364-8152	https://doi.org/10.1016/j.envsoft.2012.12.003	This paper presents a multi-agent model system to characterize land-use change dynamics. The replicable parameterization process should be useful to the development of simulation frameworks, important to environmental policy makers to analyze different scenarios during decision making process. The methodological two-fold approach intends to form a solid backbone based on: (i) the systematic and s…
376	Building Ontology from Texts	Benaissa, Bedr-eddine; Bouchiha, Djelloul; Zouaoui, Amine; Doumi, Noureddine	2015	Procedia Computer Science	1877-0509	https://doi.org/10.1016/j.procs.2015.12.042	The purpose of this paper is to present an approach to create semi-automatically ontology from Arabic texts. The whole process is supervised by a linguistic expert. Our involvement in this project focused on a lexical ontology, taking as model the WordNet ontology, and as input source, the “Arabic verbs” of a contemporary monolingual dictionary () /mζjm Alγny/ in the form a lexical database. The …
377	Ontological anti-patterns: empirically uncovered error-prone structures in ontology-driven conceptual models	Sales, Tiago Prince; Guizzardi, Giancarlo	2015	Data & Knowledge Engineering	0169-023X	https://doi.org/10.1016/j.datak.2015.06.004	The construction of large-scale reference conceptual models is a complex engineering activity. To develop high-quality models, a modeler must have the support of expressive engineering tools such as theoretically well-founded modeling languages and methodologies, patterns and anti-patterns and automated supporting environments. This paper proposes a set of Ontological Anti-Patterns for Ontology-D…
378	Semantic mappings and locality of nursing diagnostic concepts in UMLS	Kim, Tae Youn; Coenen, Amy; Hardiker, Nicholas	2012	Journal of Biomedical Informatics	1532-0464	https://doi.org/10.1016/j.jbi.2011.09.002	One solution for enhancing the interoperability between nursing information systems, given the availability of multiple nursing terminologies, is to cross-map existing nursing concepts. The Unified Medical Language System (UMLS) developed and distributed by the National Library of Medicine (NLM) is a knowledge resource containing cross-mappings of various terminologies in a unified framework. Whi…
379	S3Mining: A model-driven engineering approach for supporting novice data miners in selecting suitable classifiers	Espinosa, Roberto; García-Saiz, Diego; Zorrilla, Marta; Zubcoff, José Jacobo; Mazón, Jose-Norberto	2019	Computer Standards & Interfaces	0920-5489	https://doi.org/10.1016/j.csi.2019.03.004	Data mining has proven to be very useful in order to extract information from data in many different contexts. However, due to the complexity of data mining techniques, it is required the know-how of an expert in this field to select and use them. Actually, adequately applying data mining is out of the reach of novice users which have expertise in their area of work, but lack skills to employ the…
380	Building a geocollaboratory: Supporting Human–Environment Regional Observatory (HERO) collaborative science activities	MacEachren, Alan M.; Pike, William; Yu, Chaoqing; Brewer, Isaac; Gahegan, Mark; Weaver, Stephen D.; Yarnal, Brent	2006	Computers, Environment and Urban Systems	0198-9715	https://doi.org/10.1016/j.compenvurbsys.2005.10.005	Collaboratories have been defined as centers without walls, virtual places where teams of scientists can undertake coordinated research. As part of the Human–Environment Regional Observatory (HERO) infrastructure project, we have been developing a geocollaboratory to support work by geographically distributed scientists about geographic problems. Our specific focus is on science teams developing …
381	OntoPowSys: A power system ontology for cross domain interactions in an eco industrial park	Devanand, Aravind; Karmakar, Gourab; Krdzavac, Nenad; Rigo-Mariani, Rémy; Eddy, Y. S. Foo; Karimi, Iftekhar A.; Kraft, Markus	2020	Energy and AI	2666-5468	https://doi.org/10.1016/j.egyai.2020.100008	Knowledge management in multi-domain, heterogeneous industrial networks like an Eco-Industrial Park (EIP) is a challenging task. In this paper, an ontology-based management system has been proposed for addressing this challenge. It focuses on the power systems domain and provides a framework for integrating this knowledge with the other domains of an EIP. The proposed ontology, OntoPowSys is expr…
382	A reusable framework for health counseling dialogue systems based on a behavioral medicine ontology	Bickmore, Timothy W.; Schulman, Daniel; Sidner, Candace L.	2011	Journal of Biomedical Informatics	1532-0464	https://doi.org/10.1016/j.jbi.2010.12.006	Automated approaches to promoting health behavior change, such as exercise, diet, and medication adherence promotion, have the potential for significant positive impact on society. We describe a theory-driven computational model of dialogue that simulates a human health counselor who is helping his or her clients to change via a series of conversations over time. Applications built using this mod…
383	Learning domain ontologies for semantic Web service descriptions	Sabou, Marta; Wroe, Chris; Goble, Carole; Stuckenschmidt, Heiner	2005	Journal of Web Semantics	1570-8268	https://doi.org/10.1016/j.websem.2005.09.008	High quality domain ontologies are essential for successful employment of semantic Web services. However, their acquisition is difficult and costly, thus hampering the development of this field. In this paper we report on the first stage of research that aims to develop (semi-)automatic ontology learning tools in the context of Web services that can support domain experts in the ontology building…
384	Opportunistic sensing for inferring in-the-wild human contexts based on activity pattern recognition using smart computing	Ehatisham-ul-Haq, Muhammad; Azam, Muhammad Awais	2020	Future Generation Computer Systems	0167-739X	https://doi.org/10.1016/j.future.2020.01.003	In recent years, with the evolution of internet-of-things and smart sensing technologies, sensor-based physical activity recognition has gained substantial prominence, and numerous research works have been conducted in this regard. However, the accurate recognition of in-the-wild human activities and the associated contexts remains an open research challenge to be addressed. This research work pr…
385	A proposed semantic framework for diabetes education content management, customisation and delivery within the M2DM project	Boulos, M. N. Kamel; Harvey, F. E.; Roudsari, A. V.; Bellazzi, R.; Hernando, M. E.; Deutsch, T.; Cramp, D. G.; Carson, E. R.	2006	Computer Methods and Programs in Biomedicine	0169-2607	https://doi.org/10.1016/j.cmpb.2006.07.003	M2DM (multi access services for telematic management of diabetes mellitus, http://www.labmedinfo.org/research/m2dm/m2dm.htm) is an EU-funded telemedicine project that aims at increasing the quality of diabetes care by improving communication between patients and caregivers. As part of this project, we have undertaken the initial work of describing the necessary requirements (framework) of an adva…
386	Domain Ontologies Integration for Virtual Modelling and Simulation Environments	Smirnov, Pavel A.; Kovalchuk, Sergey V.; Dukhanov, Alexey V.	2014	Procedia Computer Science	1877-0509	https://doi.org/10.1016/j.procs.2014.05.234	This paper presents a model of semantic ontologies integration into workflow co mposition design process via Virtual Simu lation Objects (VSO) concept and technology. Doma in knowledge distributed over open linked data sources may be usefully applied for new VSO-images design and used for organization co mputational-intensive simulation e xpe riments. In this paper we describe the VSO- architectu…
387	Ontology development for unified traditional Chinese medical language system	Zhou, Xuezhong; Wu, Zhaohui; Yin, Aining; Wu, Lancheng; Fan, Weiyu; Zhang, Ruen	2004	Artificial Intelligence in Medicine	0933-3657	https://doi.org/10.1016/j.artmed.2004.01.014	Traditional Chinese medicine (TCM) as a complete knowledge system researches into human health conditions via a different approach compared to orthodox medicine. We are developing a unified traditional Chinese medical language system (UTCMLS) through an ontology approach that will support TCM language knowledge storage, concept-based information retrieval and information integration. UTCMLS is a …
388	Semi-automatic terminology ontology learning based on topic modeling	Rani, Monika; Dhar, Amit Kumar; Vyas, O. P.	2017	Engineering Applications of Artificial Intelligence	0952-1976	https://doi.org/10.1016/j.engappai.2017.05.006	Ontologies provide features like a common vocabulary, reusability, machine-readable content, and also allows for semantic search, facilitate agent interaction and ordering & structuring of knowledge for the Semantic Web (Web 3.0) application. However, the challenge in ontology engineering is automatic learning, i.e., the there is still a lack of fully automatic approach from a text corpus or data…
389	A knowledge-based system for generating interaction networks from ecological data	Coetzer, Willem; Moodley, Deshendran; Gerber, Aurona	2017	Data & Knowledge Engineering	0169-023X	https://doi.org/10.1016/j.datak.2017.09.005	Semantic heterogeneity hampers efforts to find, integrate, analyse and interpret ecological data. An application case-study is described, in which the objective was to automate the integration and interpretation of heterogeneous, flower-visiting ecological data. A prototype knowledge-based system is described and evaluated. The system's semantic architecture uses a combination of ontologies and a…
390	Domain-oriented software development environment	Oliveira, Káthia Marçal de; Zlot, Fábio; Rocha, Ana Regina; Travassos, Guilherme Horta; Galotta, Cátia; Menezes, Crediné Silva de	2004	Journal of Systems and Software	0164-1212	https://doi.org/10.1016/S0164-1212(03)00233-4	During software development, one of the most critical activities for software engineers is the correct description and identification of product requirements. This activity involves understanding the problem, which is essential to allow one to define a solution for it. To do this, it is important not only to understand the tasks routinely performed which are part of the problem, but more importan…
391	Women and dementia – not forgotten	Bamford, Sally-Marie; Walker, Trinley	2012	Maturitas	0378-5122	https://doi.org/10.1016/j.maturitas.2012.06.013	Objectives To inform our understanding of gender, sex and dementia for women's health and highlight both current and emerging issues. The purpose of this article is to provide policy makers with an improved understanding of the sex-specific and gender dimensions that exist to help formulate more effective and targeted health and social care policies. Methods The findings, from which this article …
392	An ontology for Autism Spectrum Disorder (ASD) to infer ASD phenotypes from Autism Diagnostic Interview-Revised data	Mugzach, Omri; Peleg, Mor; Bagley, Steven C.; Guter, Stephen J.; Cook, Edwin H.; Altman, Russ B.	2015	Journal of Biomedical Informatics	1532-0464	https://doi.org/10.1016/j.jbi.2015.06.026	Objective Our goal is to create an ontology that will allow data integration and reasoning with subject data to classify subjects, and based on this classification, to infer new knowledge on Autism Spectrum Disorder (ASD) and related neurodevelopmental disorders (NDD). We take a first step toward this goal by extending an existing autism ontology to allow automatic inference of ASD phenotypes and…
393	Food Track & Trace ontology for helping the food traceability control	Pizzuti, Teresa; Mirabelli, Giovanni; Sanz-Bobi, Miguel Angel; Goméz-Gonzaléz, Fernando	2014	Journal of Food Engineering	0260-8774	https://doi.org/10.1016/j.jfoodeng.2013.07.017	This paper describes a food ontology developed for traceability purposes. The Food Track&Trace Ontology (FTTO) is part of a general framework devoted to managing food traceability and it has been developed with the aim of being connected with a Global Track&Trace Information System. The main goal of the proposed FTTO Ontology is to include the most representative food concepts involved in a SC al…
394	Semantic annotation for knowledge management: Requirements and a survey of the state of the art	Uren, Victoria; Cimiano, Philipp; Iria, José; Handschuh, Siegfried; Vargas-Vera, Maria; Motta, Enrico; Ciravegna, Fabio	2006	Journal of Web Semantics	1570-8268	https://doi.org/10.1016/j.websem.2005.10.002	While much of a company's knowledge can be found in text repositories, current content management systems have limited capabilities for structuring and interpreting documents. In the emerging Semantic Web, search, interpretation and aggregation can be addressed by ontology-based semantic mark-up. In this paper, we examine semantic annotation, identify a number of requirements, and review the curr…
395	Higher-level Knowledge, Rational and Social Levels Constraints of the Common Model of the Mind	Lieto, Antonio; Kennedy, William G.; Lebiere, Christian; Romero, Oscar J.; Taatgen, Niels; West, Robert L.	2018	Procedia Computer Science	1877-0509	https://doi.org/10.1016/j.procs.2018.11.033	We present the input to the discussion about the computational framework known as Common Model of Cognition (CMC) from the working group dealing with the knowledge/rational/social levels. In particular, we present a list of the higher level constraints that should be addressed within such a general framework.
396	Formal foundations for situation awareness based on dependent type theory	Dapoigny, Richard; Barlatier, Patrick	2013	Information Fusion	1566-2535	https://doi.org/10.1016/j.inffus.2012.02.006	Cognitive situation awareness has recently caught the attention of the information fusion community. Some approaches have developed formalizations that are both ontology-based and underpinned with Situation Theory. While the semantics of Situation Theory is very attractive from the cognitive point of view, the languages that are used to express knowledge and to reason with suffer from a number of…
397	An ontological approach for pathology assessment and diagnosis of tunnels	Dimitrova, Vania; Mehmood, Muhammad Owais; Thakker, Dhavalkumar; Sage-Vallier, Bastien; Valdes, Joaquin; Cohn, Anthony G.	2020	Engineering Applications of Artificial Intelligence	0952-1976	https://doi.org/10.1016/j.engappai.2019.103450	Tunnel maintenance requires complex decision making, which involves pathology diagnosis and risk assessment, to ensure full safety while optimising maintenance and repair costs. A Decision Support System (DSS) can play a key role in this process by supporting the decision makers in identifying pathologies based on disorders present in various tunnel portions and contextual factors affecting a tun…
398	Publication, discovery and interoperability of Clinical Decision Support Systems: A Linked Data approach	Marco-Ruiz, Luis; Pedrinaci, Carlos; Maldonado, J. A.; Panziera, Luca; Chen, Rong; Bellika, J. Gustav	2016	Journal of Biomedical Informatics	1532-0464	https://doi.org/10.1016/j.jbi.2016.07.011	Background The high costs involved in the development of Clinical Decision Support Systems (CDSS) make it necessary to share their functionality across different systems and organizations. Service Oriented Architectures (SOA) have been proposed to allow reusing CDSS by encapsulating them in a Web service. However, strong barriers in sharing CDS functionality are still present as a consequence of …
399	A framework for constructing cognition ontologies using WordNet, FrameNet, and SUMO	Reed, Stephen K.; Pease, Adam	2015	Cognitive Systems Research	1389-0417	https://doi.org/10.1016/j.cogsys.2014.06.001	Psychoinformatics is an emerging discipline that uses tools from the information sciences to organize psychological data. This article supports that objective by proposing a framework for constructing cognition ontologies by using WordNet, FrameNet, and the Suggested Upper Merged Ontology (SUMO). The first section describes the major characteristics of each of these tools. WordNet is a large lexi…
400	Supply chain knowledge management supported by a simple knowledge organization system	Rodríguez-Enríquez, Cristian A.; Alor-Hernández, Giner; Mejia-Miranda, Jezreel; Sánchez-Cervantes, Jose L.; Rodríguez-Mazahua, Lisbeth; Sánchez-Ramírez, Cuauhtémoc	2016	Electronic Commerce Research and Applications	1567-4223	https://doi.org/10.1016/j.elerap.2016.06.004	Supply chain management and business-to-business procurement present several drawbacks in terms of knowledge management. Every stage of a supply chain lacks an effective approach to integrate data workflows for knowledge acquisition. Thus, semantic technologies such as the simple knowledge organization system (SKOS) are being adapted to the requirements of the knowledge management systems of comp…
401	Adapting ontologies to best-practice artifacts using transformation patterns: Method, implementation and use cases	Svátek, Vojtěch; Dudáš, Marek; Zamazal, Ondřej	2016	Journal of Web Semantics	1570-8268	https://doi.org/10.1016/j.websem.2016.07.002	Reengineering an existing ontology to get it aligned with best practices, represented as design patterns or core ontologies, can be challenging. We demonstrate how the versatile PatOMat framework for pattern-based ontology transformation, together with the GUIPOT Protégé plugin as its front-end, can be used to fulfill this task. Two different use cases are presented. One consists in introducing r…
402	Constructing a dental implant ontology for domain specific clustering and life span analysis	Trappey, Charles V.; Wang, Tong-Mei; Hoang, Sean; Trappey, Amy J. C.	2013	Advanced Engineering Informatics	1474-0346	https://doi.org/10.1016/j.aei.2013.04.003	Dental implant and prosthetics is a growing industry that follows the increasing aged populations that incur a higher percentage of tooth loss [1]. The dental implant sector is one of the most technical oriented fields in dentistry with many new techniques, devices, and materials being invented and put to clinical trials. Most innovations and technologies tend to be protected by intellectual prop…
403	Semantic enrichment for medical ontologies	Lee, Yugyung; Geller, James	2006	Journal of Biomedical Informatics	1532-0464	https://doi.org/10.1016/j.jbi.2005.08.001	The Unified Medical Language System (UMLS) contains two separate but interconnected knowledge structures, the Semantic Network (upper level) and the Metathesaurus (lower level). In this paper, we have attempted to work out better how the use of such a two-level structure in the medical field has led to notable advances in terminologies and ontologies. However, most ontologies and terminologies do…
404	Ontologies supporting continuity of care: The case of heart failure	Eccher, Claudio; Purin, Barbara; Pisanelli, Domenico M.; Battaglia, Massimo; Apolloni, Ivano; Forti, Stefano	2006	Computers in Biology and Medicine	0010-4825	https://doi.org/10.1016/j.compbiomed.2005.07.002	Heart failure can be the final stage of almost any type of cardiovascular diseases. Such diseases are the leading cause of recurrent hospital stay and mortality in developed countries, and an increasingly important cause of morbidity and mortality in developing countries. In consideration of the growing incidence of this syndrome, the Province of Trento (Northern Italy) supports a research projec…
405	Foundations of information technology based on Bunge's systemist philosophy of reality.	Lukyanenko, Roman; Storey, Veda C.; Pastor, Oscar	2021	Software and systems modeling	1619-1374 1619-1366	10.1007/s10270-021-00862-5	General ontology is a prominent theoretical foundation for information technology analysis, design, and development. Ontology is a branch of philosophy which studies what exists in reality. A widely used ontology in information systems, especially for conceptual modeling, is the BWW (Bunge-Wand-Weber), which is based on ideas of the philosopher and physicist Mario Bunge, as synthesized by Wand an…
406	Organic Codes: A Unifying Concept for Life.	de Farias, Savio Torres; Prosdocimi, Francisco; Caponi, Gustavo	2021	Acta biotheoretica	1572-8358 0001-5342	10.1007/s10441-021-09422-2	Although the knowledge about biological systems has advanced exponentially in recent decades, it is surprising to realize that the very definition of Life keeps presenting theoretical challenges. Even if several lines of reasoning seek to identify the essence of life phenomenon, most of these thoughts contain fundamental problem in their basic conceptual structure. Most concepts fail to identify …
407	Towards a Semantic Data Harmonization Federated Infrastructure.	Martinez-Costa, Catalina; Abad-Navarro, Francisco	2021	Studies in health technology and informatics	1879-8365 0926-9630	10.3233/SHTI210116	Data integration is an increasing need in medical informatics projects like the EU Precise4Q project, in which multidisciplinary semantically and syntactically heterogeneous data across several institutions needs to be integrated. Besides, data sharing agreements often allow a virtual data integration only, because data cannot leave the source repository. We propose a data harmonization infrastru…
408	TCDO: A Community-Based Ontology for Integrative Representation and Analysis of Traditional Chinese Drugs and Their Properties.	Zhu, Yan; Liu, Lihong; Gao, Bo; Liu, Jing; Qiao, Xingchao; Lian, Chaojie; He, Yongqun	2021	Evidence-based complementary and alternative medicine : eCAM	1741-427X 1741-4288	10.1155/2021/6637810	Traditional Chinese drugs (TCDs) have been widely used in clinical practice in China and many other regions for thousands of years. Nowadays TCD's bioactive ingredients and mechanisms of action are being identified. However, the lack of standardized terminologies or ontologies for the description of TCDs has hindered the interoperability and deep analysis of TCD knowledge and data. By aligning wi…
409	Developing an Ontology for Documenting Adverse Events While Avoiding Pitfalls.	Neuenschwander, Stefanie; Romao, Patricia; Holm, Jürgen; Sariyar, Murat	2022	Studies in health technology and informatics	1879-8365 0926-9630	10.3233/SHTI210885	Ontologies promise more benefits than terminologies in terms of data annotation and computer-assisted reasoning, by defining a hierarchy of terms and their relations within a domain. Here, we present central insights related to the development of an ontology for documenting events during interoperative neuromonitoring (IOM), for which we used the Basic Formal Ontology (BFO) as an upper-level onto…
410	Ontological modeling of the International Classification of Functioning, Disabilities and Health (ICF): Activities&Participation and Environmental Factors components.	Cozzi, Silvia; Martinuzzi, Andrea; Della Mea, Vincenzo	2021	BMC medical informatics and decision making	1472-6947	10.1186/s12911-021-01729-x	BACKGROUND: The International Classification of Functioning, Disability and Health (ICF) is a classification of health and health-related states developed by the World Health Organization (WHO) to provide a standard and unified language to be used as a reference model for the description of health and health-related states. The concept of functioning on which ICF is based is that of a "dynamic in…
415	Knowledge-based approaches to drug discovery for rare diseases	Alves, Vinicius M.; Korn, Daniel; Pervitsky, Vera; Thieme, Andrew; Capuzzi, Stephen J.; Baker, Nancy; Chirkova, Rada; Ekins, Sean; Muratov, Eugene N.; Hickey, Anthony; Tropsha, Alexander	2022	Drug Discovery Today	1359-6446	https://doi.org/10.1016/j.drudis.2021.10.014	The conventional drug discovery pipeline has proven to be unsustainable for rare diseases. Herein, we discuss recent advances in biomedical knowledge mining applied to discovering therapeutics for rare diseases. We summarize current chemogenomics data of relevance to rare diseases and provide a perspective on the effectiveness of machine learning (ML) and biomedical knowledge graph mining in rare…
416	An intelligent system for modeling and evaluation of domain ontologies for Crystallography as a prospective domain with a focus on their retrieval	Deepak, Gerard; Gulzar, Zameer; Leema, A. Anny	2021	Computers & Electrical Engineering	0045-7906	https://doi.org/10.1016/j.compeleceng.2021.107604	Ontological design is a better approach to depict the chosen theory and terms and the related concepts. It is necessary as some theories and terms are quite troublesome for understanding and their relationship within the selected region or field. In this study, Crystallography is chosen as the main field and different approaches were used to build the relationship between the concepts present in …
417	A core ontology on the Human–Computer Interaction phenomenon	Costa, Simone Dornelas; Barcellos, Monalessa Perini; Falbo, Ricardo de Almeida; Conte, Tayana; Oliveira, Káthia M. de	2022	Data & Knowledge Engineering	0169-023X	https://doi.org/10.1016/j.datak.2021.101977	Human–Computer Interaction (HCI) is a complex communication phenomenon involving human beings and computer systems that gained large attention from industry and academia with the advent of new types of interactive systems (mobile applications, smart cities, smart homes, ubiquitous systems and so on). Despite of its importance, there is still a lack of formal and explicit representations of what t…
418	An ontology-based framework to formalize and represent 4D printing knowledge in design	Dimassi, Saoussen; Demoly, Frédéric; Cruz, Christophe; Qi, H. Jerry; Kim, Kyoung-Yun; André, Jean-Claude; Gomes, Samuel	2021	Computers in Industry	0166-3615	https://doi.org/10.1016/j.compind.2020.103374	Over the last decade, 4D printing paradigm has received intensive research efforts, whether from researchers in additive manufacturing (AM) or in smart materials (SMs) development. Related research works have thereby generated a large number of ad-hoc solutions with relevant disparate and scattered knowledge. This lack of common core knowledge is mainly due to the multiple involved expertise for …
419	A Platform and Algorithms for Interoperability Between Clinical Coding Systems	Juric, Damir; Geleta, David; McKay, Gregory; Stoilos, Giorgos	2021	Procedia Computer Science	1877-0509	https://doi.org/10.1016/j.procs.2021.08.058	A large number of conceptually different medical coding and classification systems are in use in medical practice, of which the most popular are ICD-9, ICD-10, and Read Codes. To achieve interoperability, a platform that enables translation between them is needed. In this paper we report on the progress of Babylon Health in developing such an interoperability platform. Based on state-of-the-art p…
420	An Overview of Biomedical Ontologies for Pandemics and Infectious Diseases Representation	Bayoudhi, Leila; Sassi, Najla; Jaziri, Wassim	2021	Procedia Computer Science	1877-0509	https://doi.org/10.1016/j.procs.2021.09.201	Several infectious diseases and pandemics have so far emerged. Pandemics are by nature rapidly evolving. In this context, COVID-19 cases, seen recently in a growing number of countries around the world, have been increasing exponentially. So, researchers and responsible actors should take quick decisions to mitigate the spread of such diseases. To do so, several computer science solutions, includ…
421	Making science computable: Developing code systems for statistics, study design, and risk of bias	Alper, Brian S.; Dehnbostel, Joanne; Afzal, Muhammad; Subbian, Vignesh; Soares, Andrey; Kunnamo, Ilkka; Shahin, Khalid; McClure, Robert C.	2021	Journal of Biomedical Informatics	1532-0464	https://doi.org/10.1016/j.jbi.2021.103685	The COVID-19 crisis led a group of scientific and informatics experts to accelerate development of an infrastructure for electronic data exchange for the identification, processing, and reporting of scientific findings. The Fast Healthcare Interoperability Resources (FHIR®) standard which is overcoming the interoperability problems in health information exchange was extended to evidence-based med…
422	Extracting data models from background knowledge graphs	Oliveira, Daniela; d’Aquin, Mathieu	2022	Knowledge-Based Systems	0950-7051	https://doi.org/10.1016/j.knosys.2021.107818	Knowledge Graphs have emerged as a core technology to aggregate and publish knowledge on the Web. However, integrating knowledge from different sources, not specifically designed to be interoperable, is not a trivial task. Finding the right ontologies to model a dataset is a challenge since several valid data models exist and there is no clear agreement between them. In this paper, we propose to …
423	Overview of GFO 2.0 Functions: An ontology module for representing teleological knowledge	Burek, Patryk; Loebe, Frank; Herre, Heinrich	2021	Procedia Computer Science	1877-0509	https://doi.org/10.1016/j.procs.2021.08.105	Teleological knowledge and functional representation are present in numerous scientific and engineering disciplines and are key aspects addressed by a broad spectrum of design and modeling frameworks. The current paper summarizes the results obtained in the area of functional modeling achieved under the umbrella of the second release of the General Formal Ontology (GFO 2.0), which is a modular to…
424	A review of the generation of requirements specification in natural language using objects UML models and domain ontology	Abdalazeim, Alaa; Meziane, Farid	2021	Procedia Computer Science	1877-0509	https://doi.org/10.1016/j.procs.2021.05.102	In the software development life cycle, requirements engineering is the main process that is derived from users by informal interviews written in natural language by requirements engineers (analysts). The requirements may suffer from incompleteness and ambiguity when transformed into formal or semi-formal models that are not well understood by stakeholders. Hence, the stakeholder cannot verify if…
425	Surgical data science – from concepts toward clinical translation	Maier-Hein, Lena; Eisenmann, Matthias; Sarikaya, Duygu; März, Keno; Collins, Toby; Malpani, Anand; Fallert, Johannes; Feussner, Hubertus; Giannarou, Stamatia; Mascagni, Pietro; Nakawala, Hirenkumar; Park, Adrian; Pugh, Carla; Stoyanov, Danail; Vedula, Swaroop S.; Cleary, Kevin; Fichtinger, Gabor; Forestier, Germain; Gibaud, Bernard; Grantcharov, Teodor; Hashizume, Makoto; Heckmann-Nötzel, Doreen;…	2022	Medical Image Analysis	1361-8415	https://doi.org/10.1016/j.media.2021.102306	Recent developments in data science in general and machine learning in particular have transformed the way experts envision the future of surgery. Surgical Data Science (SDS) is a new research field that aims to improve the quality of interventional healthcare through the capture, organization, analysis and modeling of data. While an increasing number of data-driven approaches and clinical applic…
426	Introducing the Open Energy Ontology: Enhancing data interpretation and interfacing in energy systems analysis	Booshehri, Meisam; Emele, Lukas; Flügel, Simon; Förster, Hannah; Frey, Johannes; Frey, Ulrich; Glauer, Martin; Hastings, Janna; Hofmann, Christian; Hoyer-Klick, Carsten; Hülk, Ludwig; Kleinau, Anna; Knosala, Kevin; Kotzur, Leander; Kuckertz, Patrick; Mossakowski, Till; Muschner, Christoph; Neuhaus, Fabian; Pehl, Michaja; Robinius, Martin; Sehn, Vera; Stappel, Mirjam	2021	Energy and AI	2666-5468	https://doi.org/10.1016/j.egyai.2021.100074	Heterogeneous data, different definitions and incompatible models are a huge problem in many domains, with no exception for the field of energy systems analysis. Hence, it is hard to re-use results, compare model results or couple models at all. Ontologies provide a precisely defined vocabulary to build a common and shared conceptualisation of the energy domain. Here, we present the Open Energy O…
