# Supplementary material for: The use of Foundational Ontologies in Bioinformatics
Source: Research Square preprint supplement (doi:10.21203/rs.3.rs-1929507/v1), 2022-08-09
Supplement: Supplementary file 7 [file Extraction - 4 - Assessment.xlsx]

## Sheet: Final + Assesment
1	IC2	IC3	IC3	The BioTop Family of Upper Level Ontological Resources for Biomedicine.	Schulz, Stefan; Boeker, Martin; Martinez-Costa, Catalina	2017	Studies in health technology and informatics	1879-8365 0926-9630	10.3233/978-1-61499-753-5-441	Biotop	Biomedicine	NA	NA	NA
2	IC1	IC2	IC2	Interoperability between biomedical ontologies through relation expansion, upper-level ontologies and automatic reasoning.	Hoehndorf, Robert; Dumontier, Michel; Oellrich, Anika; Rebholz-Schuhmann, Dietrich; Schofield, Paul N.; Gkoutos, Georgios V.	2011	PloS one	1932-6203 1932-6203	10.1371/journal.pone.0022006	BFO, DOLCE, GFO	Biomedicine	NA	NA	NA
3	IC2	IC2	IC2	Proposed actions are no actions: re-modeling an ontology design pattern with a realist top-level ontology.	Seddig-Raufie, Djamila; Jansen, Ludger; Schober, Daniel; Boeker, Martin; Grewe, Niels; Schulz, Stefan	2012	Journal of biomedical semantics	2041-1480	10.1186/2041-1480-3-S2-S2	Biotop	Biomedicine	Ontological Reduction	NA	NA
5	IC2	IC3	IC3	SNOMED CT standard ontology based on the ontology for general medical science.	El-Sappagh, Shaker; Franda, Francesco; Ali, Farman; Kwak, Kyung-Sup	2018	BMC medical informatics and decision making	1472-6947 1472-6947	10.1186/s12911-018-0651-5	BFO	Biomedicine	Ontological Reduction	None	Domain
6	IC2	IC2	IC2	Harmonizing SNOMED CT with BioTopLite: An Exercise in Principled Ontology Alignment.	Schulz, Stefan; Martinez-Costa, Catalina	2015	Studies in health technology and informatics	1879-8365 0926-9630		Biotop	Biomedicine	NA	NA	NA
8	IC1	IC1	IC1	Top-level categories of constitutively organized material entities--suggestions for a formal top-level ontology.	Vogt, Lars; Grobe, Peter; Quast, Bjorn; Bartolomaeus, Thomas	2011	PloS one	1932-6203 1932-6203	10.1371/journal.pone.0018794	BFO	Biomedicine	NA	NA	NA
9	IC2	IC2	IC2	Scalable representations of diseases in biomedical ontologies.	Schulz, Stefan; Spackman, Kent; James, Andrew; Cocos, Cristian; Boeker, Martin	2011	Journal of biomedical semantics	2041-1480	10.1186/2041-1480-2-S2-S6	Biotop	Diseases	Ontological Reduction	None	Domain
10	IC1	IC1	IC1	The Problems of Realism-Based Ontology Design: a Case Study in Creating Definitions for an Application Ontology for Diabetes Camps.	Schuler, James C.; Ceusters, Werner M.	2017	AMIA ... Annual Symposium proceedings. AMIA Symposium	1942-597X 1559-4076		BFO	Diabetes	Ontological Reduction	Application (IS)	Application
12	IC1	IC1	IC1	OBIB-a novel ontology for biobanking.	Brochhausen, Mathias; Zheng, Jie; Birtwell, David; Williams, Heather; Masci, Anna Maria; Ellis, Helena Judge; Stoeckert, Christian J. Jr	2016	Journal of biomedical semantics	2041-1480	10.1186/s13326-016-0068-y	BFO	Biobank	OBO Principles + Ontological Reduction	Application (querying, seach)	Domain
17	IC2	IC2	IC2	Effects of guideline-based training on the quality of formal ontologies: a randomized controlled trial.	Boeker, Martin; Jansen, Ludger; Grewe, Niels; Rohl, Johannes; Schober, Daniel; Seddig-Raufie, Djamila; Schulz, Stefan	2013	PloS one	1932-6203 1932-6203	10.1371/journal.pone.0061425	BFO, Biotop	Biomedicine	GoodOD	NA	NA
20	IC1	IC1	IC1	CNTRO 2.0: A Harmonized Semantic Web Ontology for Temporal Relation Inferencing in Clinical Narratives.	Tao, Cui; Solbrig, Harold R.; Chute, Christopher G.	2011	AMIA Joint Summits on Translational Science proceedings. AMIA Joint Summits on Translational Science	2153-4063		BFO	Clinical	Ontological Reduction	None	Domain
22	IC1	IC1	IC1	Transforming semi-structured life science diagrams into meaningful domain ontologies with DiDOn.	Keet, C. Maria	2012	Journal of biomedical informatics	1532-0480 1532-0464	10.1016/j.jbi.2012.01.004	BFO, DOLCE	Biomedicine	NA	NA	NA
24	IC1	IC1	IC1	The neurological disease ontology.	Jensen, Mark; Cox, Alexander P.; Chaudhry, Naveed; Ng, Marcus; Sule, Donat; Duncan, William; Ray, Patrick; Weinstock-Guttman, Bianca; Smith, Barry; Ruttenberg, Alan; Szigeti, Kinga; Diehl, Alexander D.	2013	Journal of biomedical semantics	2041-1480	10.1186/2041-1480-4-42	BFO	Neurological Diseases	OBO Principles + Ontological Reduction	Application (data integration)	Domain
27	IC1	IC1	IC1	Semantic aspects of the International Classification of Functioning, Disability and Health: towards sharing knowledge and unifying information.	Andronache, Adrian Stefan; Simoncello, Andrea; Della Mea, Vincenzo; Daffara, Carlo; Francescutti, Carlo	2012	American journal of physical medicine & rehabilitation	1537-7385 0894-9115	10.1097/PHM.0b013e31823d53ea	BFO, SUMO	Disability Measurements	Ontological Reduction	Application (maping experiment)	Domain
28	IC2	IC2	IC2	CSEO - the Cigarette Smoke Exposure Ontology.	Younesi, Erfan; Ansari, Sam; Guendel, Michaela; Ahmadi, Shiva; Coggins, Chris; Hoeng, Julia; Hofmann-Apitius, Martin; Peitsch, Manuel C.	2014	Journal of biomedical semantics	2041-1480	10.1186/2041-1480-5-31	BFO	Tobacco smoke exposure-associated diseases	Ontological Reduction	Metric Based Approach	Domain
29	IC2	IC2	IC2	The ChEBI reference database and ontology for biologically relevant chemistry: enhancements for 2013.	Hastings, Janna; de Matos, Paula; Dekker, Adriano; Ennis, Marcus; Harsha, Bhavana; Kale, Namrata; Muthukrishnan, Venkatesh; Owen, Gareth; Turner, Steve; Williams, Mark; Steinbeck, Christoph	2013	Nucleic acids research	1362-4962 0305-1048	10.1093/nar/gks1146	BFO	Chemical Entities	None	None	Domain
30	IC2	IC1	IC1	TRAK ontology: defining standard care for the rehabilitation of knee conditions.	Button, Kate; van Deursen, Robert W.; Soldatova, Larisa; Spasic, Irena	2013	Journal of biomedical informatics	1532-0480 1532-0464	10.1016/j.jbi.2013.04.009	BFO, Biotop	Knee Conditions	OBO Principles + Ontological Reduction	Application (IS)	Domain
36	IC2	IC1	IC1	Ontology for assessment studies of human-computer-interaction in surgery.	Machno, Andrej; Jannin, Pierre; Dameron, Olivier; Korb, Werner; Scheuermann, Gerik; Meixensberger, Jurgen	2015	Artificial intelligence in medicine	1873-2860 0933-3657	10.1016/j.artmed.2014.12.011	BFO, DOLCE, GFO	Human-Computer-Interaction in Surgery	Ontology Development 101	Validation with experts + Application	Domain
37	IC1	IC2	IC2	Grains, components and mixtures in biomedical ontologies.	Jansen, Ludger; Schulz, Stefan	2011	Journal of biomedical semantics	2041-1480	10.1186/2041-1480-2-S4-S2	Biotop	Biomedicine	NA	NA	NA
38	IC1	IC1	IC1	An ontology-based exploration of the concepts and relationships in the activities and participation component of the international classification of functioning, disability and health.	Della Mea, Vincenzo; Simoncello, Andrea	2012	Journal of biomedical semantics	2041-1480	10.1186/2041-1480-3-1	SUMO	International Classification of Function, Disability and Health	NA	NA	NA
39	IC1	IC1	IC1	The epidemiology ontology: an ontology for the semantic annotation of epidemiological resources.	Pesquita, Catia; Ferreira, Joao D.; Couto, Francisco M.; Silva, Mario J.	2014	Journal of biomedical semantics	2041-1480	10.1186/2041-1480-5-4	BFO	Epidemiology	Ontological reduction	Application (resource annotation)	Domain
40	IC1	IC1	IC1	Why functions are not special dispositions: an improved classification of realizables for top-level ontologies.	Rohl, Johannes; Jansen, Ludger	2014	Journal of biomedical semantics	2041-1480	10.1186/2041-1480-5-27	BFO, DOLCE, GFO	Biomedicine	NA	NA	NA
43	IC1	IC1	IC1	OntoStudyEdit: a new approach for ontology-based representation and management of metadata in clinical and epidemiological research.	Uciteli, Alexandr; Herre, Heinrich	2015	Journal of biomedical semantics	2041-1480	10.1186/s13326-015-0042-0	GFO	Clinical and Epidemiological	Ontological reduction	None	Domain
45	IC1	IC1	IC1	Toward a patient safety upper level ontology.	Souvignet, Julien; Rodrigues, Jean-Marie	2015	Studies in health technology and informatics	1879-8365 0926-9630		BFO	Patient Safety	Ontological reduction	Validation with experts	Domain
46	IC1	IC1	IC1	Representing vision and blindness.	Ray, Patrick L.; Cox, Alexander P.; Jensen, Mark; Allen, Travis; Duncan, William; Diehl, Alexander D.	2016	Journal of biomedical semantics	2041-1480	10.1186/s13326-016-0058-0	BFO	Sight/Blindness	Ontological reduction	None	Domain
47	IC1	IC2	IC2	CELDA -- an ontology for the comprehensive representation of cells in complex systems.	Seltmann, Stefanie; Stachelscheid, Harald; Damaschun, Alexander; Jansen, Ludger; Lekschas, Fritz; Fontaine, Jean-Fred; Nguyen-Dobinsky, Throng Nghia; Leser, Ulf; Kurtz, Andreas	2013	BMC bioinformatics	1471-2105 1471-2105	10.1186/1471-2105-14-228	Biotop	Cell Types	Ontology Development 101	Validation with experts + Application	Domain
50	IC1	IC1	IC1	Process attributes in bio-ontologies.	Andrade, Andre Q.; Blonde, Ward; Hastings, Janna; Schulz, Stefan	2012	BMC bioinformatics	1471-2105 1471-2105	10.1186/1471-2105-13-217	BFO, Biotop	Heart beating measurements	Ontological reduction	Competency Questions + Application (use case analysis)	Domain
53	IC1	IC1	IC1	An ontological analysis of medical Bayesian indicators of performance.	Barton, Adrien; Ethier, Jean-Francois; Duvauferrier, Regis; Burgun, Anita	2017	Journal of biomedical semantics	2041-1480	10.1186/s13326-016-0099-4	BFO	Diagnosis	Ontological reduction	Application (example use case scenario)	Domain
56	IC1	IC1	IC1	Information and organization in public health institutes: an ontology-based modeling of the entities in the reception-analysis-report phases.	Pozza, Giandomenico; Borgo, Stefano; Oltramari, Alessandro; Contalbrigo, Laura; Marangon, Stefano	2016	Journal of biomedical semantics	2041-1480	10.1186/s13326-016-0095-8	DOLCE	Public Health	NA	NA	NA
57	IC1	IC2	IC2	Semantic enrichment of clinical models towards semantic interoperability. The heart failure summary use case.	Martinez-Costa, Catalina; Cornet, Ronald; Karlsson, Daniel; Schulz, Stefan; Kalra, Dipak	2015	Journal of the American Medical Informatics Association : JAMIA	1527-974X 1067-5027	10.1093/jamia/ocu013	Biotop	Eletronic Health Records	NA	NA	NA
60	IC1	IC1	IC1	Development and application of an interaction network ontology for literature mining of vaccine-associated gene-gene interactions.	Hur, Junguk; Ozgur, Arzucan; Xiang, Zuoshuang; He, Yongqun	2015	Journal of biomedical semantics	2041-1480	10.1186/2041-1480-6-2	BFO	Gene Interaction	OBO Principles + Ontological reduction	Application (support text mining)	Domain
71	IC2	IC2	IC2	TNM-O: ontology support for staging of malignant tumours.	Boeker, Martin; Franca, Fabio; Bronsert, Peter; Schulz, Stefan	2016	Journal of biomedical semantics	2041-1480	10.1186/s13326-016-0106-9	Biotop	Cancer	None	Application (experimental setting: data classification using ontology)	Domain
72	IC1	IC1	IC1	The Semanticscience Integrated Ontology (SIO) for biomedical research and knowledge discovery.	Dumontier, Michel; Baker, Christopher Jo; Baran, Joachim; Callahan, Alison; Chepelev, Leonid; Cruz-Toledo, Jose; Del Rio, Nicholas R.; Duck, Geraint; Furlong, Laura I.; Keath, Nichealla; Klassen, Dana; McCusker, James P.; Queralt-Rosinach, Nuria; Samwald, Matthias; Villanueva-Rosales, Natalia; Wilkinson, Mark D.; Hoehndorf, Robert	2014	Journal of biomedical semantics	2041-1480	10.1186/2041-1480-5-14	SIO	Biomedicine	None (ULO developed considering foundations (e.g. mereotopology, processes and participation, referential relations).	NA	NA
74	IC2	IC2	IC2	Ontology patterns for tabular representations of biomedical knowledge on neglected tropical diseases.	Santana, Filipe; Schober, Daniel; Medeiros, Zulma; Freitas, Fred; Schulz, Stefan	2011	Bioinformatics (Oxford, England)	1367-4811 1367-4803	10.1093/bioinformatics/btr226	Biotop	Neglected Tropical Diseases	"Estabilished ontology guidelines" - not referenced (only one example: Rector, 2003)	Competency Questions + Application (ETL tool)	Domain
76	IC1	IC1	IC1	A Patient Safety Information Model for Interoperability.	Rodrigues, Jean Marie; Dhingra-Kumar, Neelam; Schulz, Stefan; Souvignet, Julien	2016	Studies in health technology and informatics	1879-8365 0926-9630	10.3233/978-1-61499-645-3-77	BFO	Patient Safety	Ontological reduction	Validation with experts	Domain
83	IC2	IC2	IC2	Design Considerations for a Knowledge Graph: The WATRIMed Use Case.	Some, Borlli Michel Jonas; Bordea, Georgeta; Thiessard, Frantz; Schulz, Stefan; Diallo, Gayo	2019	Studies in health technology and informatics	1879-8365 0926-9630		Biotop	Herbal-based Traditional Medicine	None	Application (integration of different knowledge resources)	Application
86	IC2	IC1	IC1	Towards a foundational representation of potential drug-drug interaction knowledge.	Brochhausen, Mathias; Schneider, Jodi; Malone, Daniel; Empey, Philip E.; Hogan, William R.; Boyce, Richard D.	2014	CEUR workshop proceedings	1613-0073 1613-0073		BFO	Potential Drug-Drug Interaction	OBO Principles + Ontological reduction	None	Domain
89	IC1	IC1	IC1	An ontological framework for the formalization, organization and usage of TCM-Knowledge.	Long, Hai; Zhu, Yan; Jia, Lirong; Gao, Bo; Liu, Jing; Liu, Lihong; Herre, Heinrich	2019	BMC medical informatics and decision making	1472-6947 1472-6947	10.1186/s12911-019-0760-9	GFO	Chinese Traditional Medicine	Ontological reduction	None	Domain
90	IC4	IC1	IC1	Ontology-Based Approach to Social Data Sentiment Analysis: Detection of Adolescent Depression Signals.	Jung, Hyesil; Park, Hyeoun-Ae; Song, Tae-Min	2017	Journal of medical Internet research	1438-8871 1438-8871	10.2196/jmir.7452	BFO	Depression	Ontology Development 101	Competency Question	Domain
91	IC2	IC1	IC1	An ontologically founded architecture for information systems in clinical and epidemiological research.	Uciteli, Alexandr; Gross, Silvia; Kireyev, Sergej; Herre, Heinrich	2011	Journal of biomedical semantics	2041-1480	10.1186/2041-1480-2-S4-S1	GFO	Clinical and Epidemiological	Ontological reduction	Application (prototype IS)	Application
97	IC1	IC1	IC1	Levels and building blocks-toward a domain granularity framework for the life sciences.	Vogt, Lars	2019	Journal of biomedical semantics	2041-1480	10.1186/s13326-019-0196-2	BFO	Biomedicine	NA	NA	NA
182	IC2	IC1	IC1	Restructuring the foundational model of anatomy.	Héja, Gergely; Varga, Péter; Pallinger, Péter; Surján, György	2006	Studies in health technology and informatics	0926-9630 0926-9630		DOLCE	Human Anatomy	NA	NA	NA
192	IC3	IC3	IC3	Towards an upper level ontology for molecular biology.	Schulz, Stefan; Beisswanger, Elena; Wermter, Joachim; Hahn, Udo	2006	AMIA ... Annual Symposium proceedings. AMIA Symposium	1942-597X 1559-4076		Biotop	Molecular Biology	NA	None	Domain
199	IC2	IC3	IC3	A top-level ontology of functions and its application in the Open Biomedical Ontologies.	Burek, Patryk; Hoehndorf, Robert; Loebe, Frank; Visagie, Johann; Herre, Heinrich; Kelso, Janet	2006	Bioinformatics (Oxford, England)	1367-4811 1367-4803	10.1093/bioinformatics/btl266	GFO	Biomedicine	Ontological reduction	Application (ontology analysis of more specific ones)	Domain
213	IC2	IC3	IC3	The RIKEN integrated database of mammals.	Masuya, Hiroshi; Makita, Yuko; Kobayashi, Norio; Nishikata, Koro; Yoshida, Yuko; Mochizuki, Yoshiki; Doi, Koji; Takatsuki, Terue; Waki, Kazunori; Tanaka, Nobuhiko; Ishii, Manabu; Matsushima, Akihiro; Takahashi, Satoshi; Hijikata, Atsushi; Kozaki, Kouji; Furuichi, Teiichi; Kawaji, Hideya; Wakana, Shigeharu; Nakamura, Yukio; Yoshiki, Atsushi; Murata, Takehide; Fukami-Kobayashi, Kaoru; Mohan, Sujath…	2011	Nucleic acids research	1362-4962 0305-1048 0305-1048	10.1093/nar/gkq1078	Other (YAMATO)	Mammalian Databases	Ontological reduction	Application (data integration + IS development)	Application
220	IC2	IC2	IC2	Alignment of the UMLS semantic network with BioTop: methodology and assessment.	Schulz, Stefan; Beisswanger, Elena; van den Hoek, László; Bodenreider, Olivier; van Mulligen, Erik M.	2009	Bioinformatics (Oxford, England)	1367-4811 1367-4803 1367-4803	10.1093/bioinformatics/btp194	Biotop	Biomedicine	NA	NA	NA
221	IC2	IC1	IC1	Coping with medical polysemy in the semantic web: the role of ontologies.	Pisanelli, Domenico M.; Gangemi, Aldo; Battaglia, Massimo; Catenacci, Carola	2004	Studies in health technology and informatics	0926-9630 0926-9630		DOLCE	Inflammation	NA	NA	NA
222	IC1	IC1	IC1	Spatio-structural granularity of biological material entities.	Vogt, Lars	2010	BMC bioinformatics	1471-2105 1471-2105	10.1186/1471-2105-11-289	BFO	Biomedicine	NA	NA	NA
223	IC2	IC2	IC2	The ontology of biological taxa.	Schulz, Stefan; Stenzhorn, Holger; Boeker, Martin	2008	Bioinformatics (Oxford, England)	1367-4811 1367-4803 1367-4803	10.1093/bioinformatics/btn158	BFO, Biotop, DOLCE	Biological Taxa	NA	NA	NA
224	IC1	IC1	IC1	OntoVIP: an ontology for the annotation of object models used for medical image simulation.	Gibaud, Bernard; Forestier, Germain; Benoit-Cattin, Hugues; Cervenansky, Frédéric; Clarysse, Patrick; Friboulet, Denis; Gaignard, Alban; Hugonnard, Patrick; Lartizien, Carole; Liebgott, Hervé; Montagnat, Johan; Tabary, Joachim; Glatard, Tristan	2014	Journal of biomedical informatics	1532-0480 1532-0464 1532-0464	10.1016/j.jbi.2014.07.008	DOLCE	Medical Image Simulation	OntoSpec	Application (IS development + querying (reasoning))	Application
226	IC1	IC1	IC1	ONTODerm--a domain ontology for dermatology.	Eapen, Bell Raj	2008	Dermatology online journal	1087-2108 1087-2108		DOLCE	Dermatology	Ontological reduction	None	Domain
227	IC1	IC1	IC1	Towards an ontology for sharing medical images and regions of interest in neuroimaging.	Temal, Lynda; Dojat, Michel; Kassel, Gilles; Gibaud, Bernard	2008	Journal of biomedical informatics	1532-0480 1532-0464	10.1016/j.jbi.2008.03.002	DOLCE	Neuroimaging	OntoSpec	Application (ontoneurobase) and use cases (mostly querying)	Domain
229	IC1	IC1	IC1	Fiat or bona fide boundary--a matter of granular perspective.	Vogt, Lars; Grobe, Peter; Quast, Björn; Bartolomaeus, Thomas	2012	PloS one	1932-6203 1932-6203	10.1371/journal.pone.0048603	BFO	Biomedicine	NA	NA	NA
231	IC1	IC1	IC1	The @neurIST ontology of intracranial aneurysms: providing terminological services for an integrated IT infrastructure.	Boeker, Martin; Stenzhorn, Holger; Kumpf, Kai; Bijlenga, Philippe; Schulz, Stefan; Hanser, Susanne	2007	AMIA ... Annual Symposium proceedings. AMIA Symposium	1942-597X 1559-4076		DOLCE	Intracranial Aneurysms	Ontological reduction	Validation with experts	Application
235	IC2	IC2	IC2	Ontological interpretation of biomedical database content.	Santana da Silva, Filipe; Jansen, Ludger; Freitas, Fred; Schulz, Stefan	2017	Journal of biomedical semantics	2041-1480	10.1186/s13326-017-0127-z	Biotop	Biomedicine	OBO Principles + Ontological reduction (Biotop)	Evaluation queries (similar to CQs)	NA
237	IC2	IC1	IC1	Inflammation ontology design pattern: an exercise in building a core biomedical ontology with descriptions and situations.	Gangemi, Aldo; Catenacci, Carola; Battaglia, Massimo	2004	Studies in health technology and informatics	0926-9630 0926-9630		DOLCE	Inflammation	Ontological reduction	None	Domain
239	IC2	IC2	IC2	HL7 FHIR: Ontological Reinterpretation of Medication Resources.	Martinez-Costa, Catalina; Schulz, Stefan	2017	Studies in health technology and informatics	1879-8365 0926-9630		Biotop	Biomedicine	Ontological reduction + ODPs	NA	NA
240	IC1	IC1	IC1	CLASSIFYING PROCESSES: AN ESSAY IN APPLIED ONTOLOGY.	Smith, Barry	2012	Ratio	0034-0006 1467-9329 0034-0006	10.1111/j.1467-9329.2012.00557.x	BFO	Biomedicine	NA	NA	NA
244	IC1	IC1	IC1	Ontological analysis of SNOMED CT.	Héja, Gergely; Surján, György; Varga, Péter	2008	BMC medical informatics and decision making	1472-6947 1472-6947	10.1186/1472-6947-8-S1-S8	DOLCE	Biomedicine	NA	NA	NA
246	IC1	IC1	IC1	A multi-layered application for the gross description using Semantic Web technology.	Kim, Hong-Gee; Ha, Byung-Hyun; Lee, Jae-Il; Kim, Myeng-Ki	2005	International journal of medical informatics	1386-5056 1386-5056	10.1016/j.ijmedinf.2004.10.002	Other	Pathology	Ontological reduction	NA	NA
249	IC1	IC1	IC1	Design principles of DOLCE-based formal representation of ICD10.	Héja, Gergely; Varga, Péter; Surján, György	2008	Studies in health technology and informatics	0926-9630 0926-9630		DOLCE	Biomedicine	Ontological reduction	NA	NA
285	IC1	IC1	IC1	A pattern-based approach to a cell tracking ontology.	Burek, Patryk; Scherf, Nico; Herre, Heinrich	2019	Procedia Computer Science	1877-0509	https://doi.org/10.1016/j.procs.2019.09.237	GFO	Cell Tracking	Ontological reduction + ODPs	None	Domain
311	IC1	IC1	IC1	Semantic SenseLab: Implementing the vision of the Semantic Web in neuroscience	Samwald, Matthias; Chen, Huajun; Ruttenberg, Alan; Lim, Ernest; Marenco, Luis; Miller, Perry; Shepherd, Gordon; Cheung, Kei-Hoi	2010	Artificial Intelligence in Medicine	0933-3657	https://doi.org/10.1016/j.artmed.2009.11.003	BFO	Neuroscience	Ontological reduction	Application (database integration)	Domain
317	IC3	IC1	IC1	Toward an ontology-based framework for clinical research databases	Kong, Y. Megan; Dahlke, Carl; Xiang, Qun; Qian, Yu; Karp, David; Scheuermann, Richard H.	2011	Journal of Biomedical Informatics	1532-0464	https://doi.org/10.1016/j.jbi.2010.05.001	BFO	Immunology	Ontological reudction (middle-out approach)	Application (database integration, data transformation)	Application
324	IC1	IC1	IC1	Towards the ontological foundations of symbolic biological theories	Schulz, Stefan; Hahn, Udo	2007	Artificial Intelligence in Medicine	0933-3657	https://doi.org/10.1016/j.artmed.2006.12.001	BFO	Biomedicine	NA	NA	NA
334	IC1	IC1	IC1	Proposal of an ontology for Mental Health Management in Brazil	Yamada, Diego Bettiol; Yoshiura, Vinicius Tohoru; Miyoshi, Newton Shydeo Brandão; Lima, Inácia Bezerra de; Shinoda, Gustavo Yukiu Usumoto; Rijo, Rui Pedro Charters Lopes; Marques, João Mazzoncini de Azevedo; Cruz-Cunha, Maria Manuela; Alves, Domingos	2018	Procedia Computer Science	1877-0509	https://doi.org/10.1016/j.procs.2018.10.020	BFO	Mental Health Management	Ontological reduction	None	Application
337	IC2	IC2	IC2	MoSuMo: A Semantic Web service to generate electrostatic potentials across solvent excluded protein surfaces and binding pockets	Gawronski, Alexander; Dumontier, Michel	2011	Computers & Graphics	0097-8493	https://doi.org/10.1016/j.cag.2011.03.039	SIO	Proteins	Ontological reduction	Application (IS development)	Application
346	IC1	IC2	IC2	BioOntoVerb: A top level ontology based framework to populate biomedical ontologies from texts	Ruiz-Martínez, Juana María; Valencia-García, Rafael; Martínez-Béjar, Rodrigo; Hoffmann, Achim	2012	Knowledge-Based Systems	0950-7051	https://doi.org/10.1016/j.knosys.2012.06.002	BFO, Biotop	Biomedicine	NA	NA	NA
349	IC1	IC1	IC1	Formal ontology for natural language processing and the integration of biomedical databases	Simon, Jonathan; Santos, Mariana Dos; Fielding, James; Smith, Barry	2006	International Journal of Medical Informatics	1386-5056	https://doi.org/10.1016/j.ijmedinf.2005.07.015	BFO	Biomedicine	Ontological Reduction	Application (integration)	Application
350	IC4	IC1	IC1	Towards an ontological theory of substance intolerance and hypersensitivity	Hogan, William R.	2011	Journal of Biomedical Informatics	1532-0464	https://doi.org/10.1016/j.jbi.2010.02.003	BFO, SIO	Substance Intolerance	Ontological reduction	None	Domain
351	IC4	IC1	IC1	NanoParticle Ontology for cancer nanotechnology research	Thomas, Dennis G.; Pappu, Rohit V.; Baker, Nathan A.	2011	Journal of Biomedical Informatics	1532-0464	https://doi.org/10.1016/j.jbi.2010.03.001	BFO	Cancer	Use cases definition + ontological reduction + OBO principles	None	Domain
353	IC1	IC1	IC1	Methods in biomedical ontology	Yu, Alexander C.	2006	Journal of Biomedical Informatics	1532-0464	https://doi.org/10.1016/j.jbi.2005.11.006	BFO, DOLCE	Biomedicine	NA	NA	NA
392	IC1	IC1	IC1	An ontology for Autism Spectrum Disorder (ASD) to infer ASD phenotypes from Autism Diagnostic Interview-Revised data	Mugzach, Omri; Peleg, Mor; Bagley, Steven C.; Guter, Stephen J.; Cook, Edwin H.; Altman, Russ B.	2015	Journal of Biomedical Informatics	1532-0464	https://doi.org/10.1016/j.jbi.2015.06.026	BFO	Autism Spectrum Disorder (ASD)	Ontological reduction	Instantiation	Domain
404	IC1	IC1	IC1	Ontologies supporting continuity of care: The case of heart failure	Eccher, Claudio; Purin, Barbara; Pisanelli, Domenico M.; Battaglia, Massimo; Apolloni, Ivano; Forti, Stefano	2006	Computers in Biology and Medicine	0010-4825	https://doi.org/10.1016/j.compbiomed.2005.07.002	DOLCE	Heart Failure	Ontological reduction	Instantiation	Application
407	IC	IC	IC	Towards a Semantic Data Harmonization Federated Infrastructure.	Martinez-Costa, Catalina; Abad-Navarro, Francisco	2021	Studies in health technology and informatics	1879-8365 0926-9630	10.3233/SHTI210116	Biotop	Clinical	Ontological reduction	Application (example use case scenario)	Application
408	IC	IC	IC	TCDO: A Community-Based Ontology for Integrative Representation and Analysis of Traditional Chinese Drugs and Their Properties.	Zhu, Yan; Liu, Lihong; Gao, Bo; Liu, Jing; Qiao, Xingchao; Lian, Chaojie; He, Yongqun	2021	Evidence-based complementary and alternative medicine : eCAM	1741-427X 1741-4288	10.1155/2021/6637810	BFO	Traditional Chinese Drugs	XOD	Instantiation	Domain
409	IC	IC	IC	Developing an Ontology for Documenting Adverse Events While Avoiding Pitfalls.	Neuenschwander, Stefanie; Romao, Patricia; Holm, Jürgen; Sariyar, Murat	2022	Studies in health technology and informatics	1879-8365 0926-9630	10.3233/SHTI210885	BFO	Interoperative Neuromonitoring	Ontological reduction	Instantiation	Domain
410	IC	IC	IC	Ontological modeling of the International Classification of Functioning, Disabilities and Health (ICF): Activities&Participation and Environmental Factors components.	Cozzi, Silvia; Martinuzzi, Andrea; Della Mea, Vincenzo	2021	BMC medical informatics and decision making	1472-6947	10.1186/s12911-021-01729-x	SUMO	International Classification of Function, Disability and Health	Main steps from methods described in [15,16,17, 18, 19]: Methontology, Ontology Development 101, Togaf (EA) and [16, 19]	Application (validation against case studies)	Domain
420	IC	IC	IC	An Overview of Biomedical Ontologies for Pandemics and Infectious Diseases Representation	Bayoudhi, Leila; Sassi, Najla; Jaziri, Wassim	2021	Procedia Computer Science	1877-0509	https://doi.org/10.1016/j.procs.2021.09.201	BFO	Pandemics and Infectious Diseases	NA	NA	NA
ID	Analysis Step 1	Analysis Step 2	Analysis Step 3	Title	Author	Publication Year	Publication Title	ISSN	DOI	FO used	Work Domain	Ontology Engineering Method/Guideline	Ontology Evaluation Method	Ontology Specificity Level
